# Supplementary material for: Antigens Expressed by Breast Cancer Cells Undergoing EMT Stimulate Cytotoxic CD8+ T Cell Immunity
Source: MDPI journal article supplement (doi:10.3390/cancers14184397), 2022-09-09

**Figure S1.** Limited role of CD4<sup>+</sup> T cells in immunity elicited by EO771 WCV against mesenchymal EO771 tumor growth.

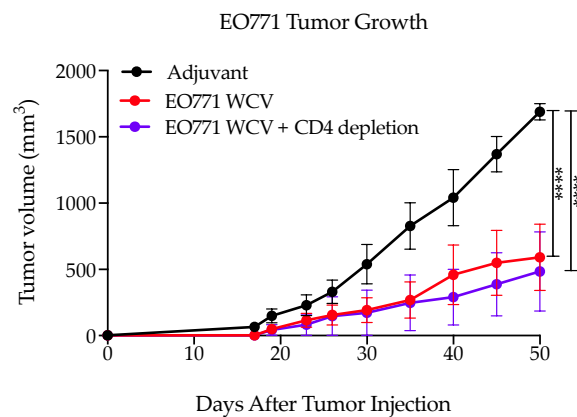

Tumor growth curve of EO771 cells in mice treated with adjuvant (n=5), EO771 WCV (n=5) or EO771 WCV plus CD4<sup>+</sup> T cell depletion (Ab clone GK1.5) (n=5). Error bars depict mean with SEM. A two-way ANOVA was performed using Dunnett's multiple comparisons test. At day 50, when compared to adjuvant alone, significant protection was provided by treatment with both EO771 WCV ( $p < 0.0001$ ) as well as EO771 WCV + CD4 depletion ( $p < 0.0001$ ).

**Figure S2.** Uncropped western blot images and densitometry from Figure 2c.

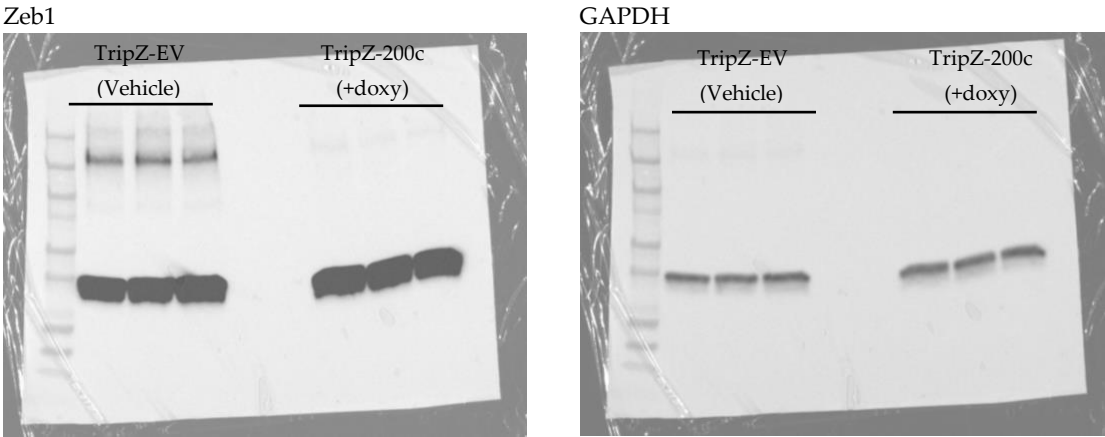

Densitometry

| Zeb1       |            |            | GAPDH      |            |            |
|------------|------------|------------|------------|------------|------------|
|            | Mean pixel | Pixel area |            | Mean pixel | Pixel area |
| Spot 1     | 1407.42    | 12728      | Spot 1     | 16451.58   | 16848      |
| Spot 2     | 1523.83    | 12728      | Spot 2     | 16705.06   | 16848      |
| Spot 3     | 1354.71    | 12728      | Spot 3     | 19561.31   | 16848      |
| Spot 4     | 218.33     | 12728      | Spot 4     | 20008.52   | 16848      |
| Spot 5     | 190.24     | 12728      | Spot 5     | 18765.15   | 16848      |
| Spot 6     | 197.94     | 12728      | Spot 6     | 18775.73   | 16848      |
| Background | 96.19      | 12728      | Background | 336.06     | 16848      |

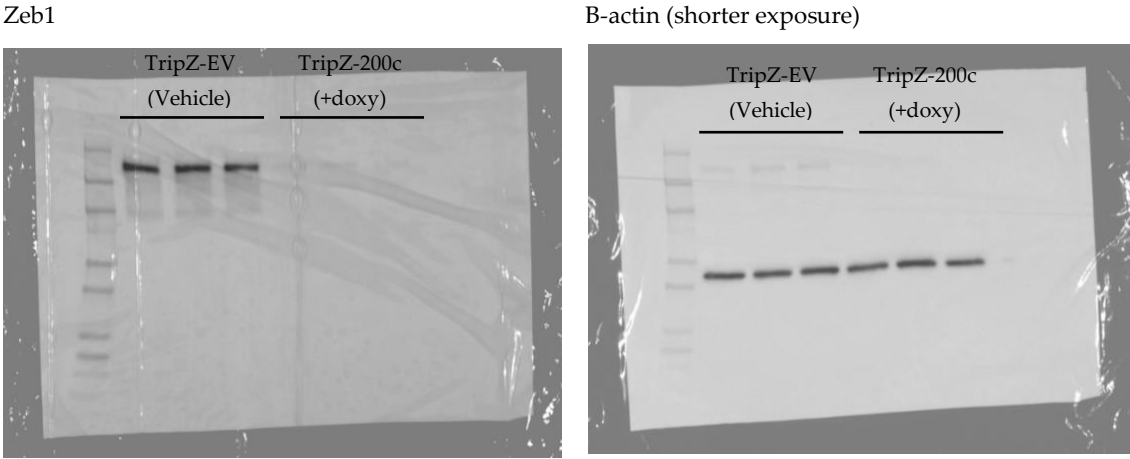

| Zeb1       |            |            | B-actin    |            |            |
|------------|------------|------------|------------|------------|------------|
|            | Mean pixel | Pixel area |            | Mean pixel | Pixel area |
| Spot 1     | 19218.37   | 9450       | Spot 1     | 25058.26   | 7350       |
| Spot 2     | 17998.71   | 9450       | Spot 2     | 22782.59   | 7350       |
| Spot 3     | 16304.25   | 9450       | Spot 3     | 25193.4    | 7350       |
| Spot 4     | 1531.76    | 9450       | Spot 4     | 23097.39   | 7350       |
| Spot 5     | 1789.48    | 9450       | Spot 5     | 26547.88   | 7350       |
| Spot 6     | 1399.07    | 9450       | Spot 6     | 20689.65   | 7350       |
| Background | 596.32     | 9450       | Background | 605.71     | 7350       |

**Figure S3.** Gating strategy to identify proliferating CD8+ T cell population from Fig. 4b flow cytometry analysis.

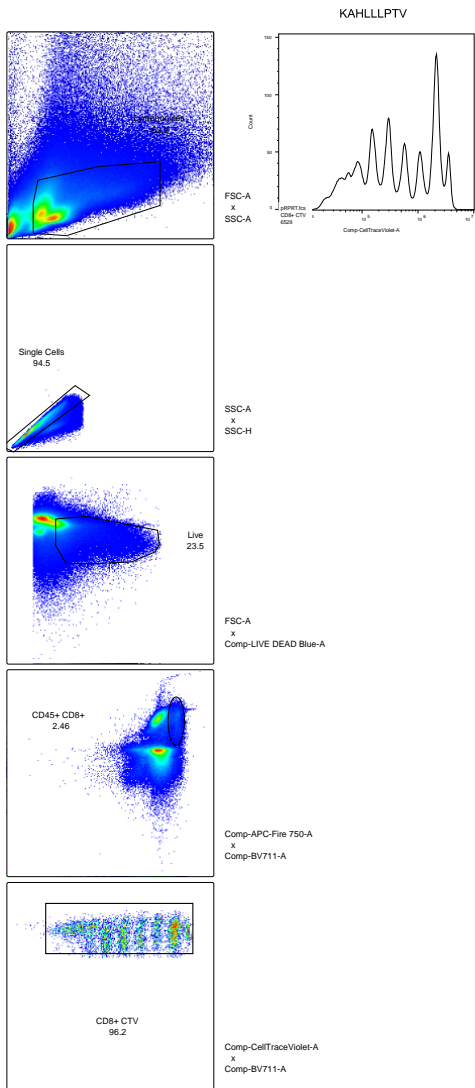

Supplement: s1 [file s1]
