# Supplementary material for: Antigens Expressed by Breast Cancer Cells Undergoing EMT Stimulate Cytotoxic CD8+ T Cell Immunity
Source: MDPI journal article supplement (doi:10.3390/cancers14184397), 2022-09-09
Supplement: s1 [file s1]

**Table S1.** Primers for qRT-PCR.

| Target             | Forward                 | Reverse                 |
|--------------------|-------------------------|-------------------------|
| Qki                | GAAGTCCGCGCCCAAG        | GCCTCTATTTTGCTCCTCCTTCT |
| ESPR1              | CTTCCAAGGTTACCAGTATGCAA | TTGTTGTAAGGCTTTGCTGGGT  |
| RMB47 Isoform 1, 4 | GGAAGAGCAGGGATTGCAGA    | CTCTGAGGCAAACCCGAACT    |
| RMB47 Isoform 2, 3 | AACAGGCTTAGCGCTCCATT    | CTCTGAGGCAAACCCGAACT    |
| ESPR2              | TAGAGGTGGCCCGTTTCCTA    | CATAGCGGTTAAGGACCTGCT   |
| NOVA2              | CCAAAGACTTCTACCCAGGAAC  | GTCGGGGTTTCATCGTGGTTT   |
| SRSF6              | GCGTCTACATAGGACGCCTG    | TCCACGAAACCGTACCCATT    |
| CDH1 (mine)        | ATGATGCCCCCAACACTCC     | TGGCAATGGGTGAACCATCA    |
| Cdh2               | GCTTCGTGACACCCCTCAC     | ACAGACGCCTGAAGCAAGG     |
| ZEB1 (mine)        | GCGGCGCAATAACGTTACAA    | TCATGACTGCTGGCTTCTGG    |
| Vim                | GGCTGCGAGAGAAATTGCAG    | CGATCTGGACATGCTGTTCT    |

**Table S2.** Primers for intron retention events.

| Target     | Forward                 | Reverse                 |
|------------|-------------------------|-------------------------|
| Macrodl    | AAGGACGAGGGCATTACCG     | CCTGTTCAAGGTGGGATGTG    |
| Dvl1       | CAGCATCACAGACTCCACCAT   | ATCTCCCGAAGCACCCGTA     |
| Rhod       | GCTGCAAGATAGACCTGCGT    | ATTCTGAGTAATCCGCCGCC    |
| Kmt2d      | CCTCTTTGCTCCCTTTGGCA    | TCGGCGGGTTACTCAGGTTA    |
| Ocel       | GTACCCACCACTGACCAACA    | CCCTCGCTTCTTCTCAAACCTCT |
| Rabggt     | CTCCAAGATGGGGACCTTGC    | CTGTTTCATCAGTGGCTGAGTC  |
| Trim11     | GACATTAAGGACGCCCTGTG    | TCCCACGTGTGGTCAGAAAG    |
| Inf2       | CCTCCTGGTATGTGGATGCC    | TCACACACAGCCTTTTTCCT    |
| Tex9       | GACTCCACTCTGCAGATAAAGAA | TTGGCAGTCTGCGCATC       |
| Dennd3     | AGTGGTCGTGTTGATGCCT     | GGAGAACGGTGATCCGTGAG    |
| Pan2       | CGTCCACCCTACTCTTCACAC   | CTCCAGGCAGATACTTCGCT    |
| Rfng (4/5) | ACGAAAATGGTTCTGCCACG    | CGGGCTCATTTTGAGGGCAA    |
| (5/6)      | TCTGGTTTGCTACTGGTGGG    | GCAAAAATAGCACCAGACGGC   |
| Gpt (8/9)  | GGGTTTCGTGGTGGCTATGT    | GAAGACCTGCTCCGTGAGTT    |
| (9/10)     | CTTCCCTCAAATTCAGCTGCC   | AATGATAGGTGCCCTCCTGCT   |
| Ydj        | AACTAGAAGCTCAACTCAGCCG  | CAGCCGTGTGAAGCGGA       |
| Usp21      | TTCTGGGCTCTGGTCATGTTG   | AAGTCCCTTCGCAGACAGAAG   |
| Ampd2      | GCCTGTTCTCAGCTACCAC     | TCATGAGCACGCTGTTACGG    |
| Cchr1      | TTCGTGGTCGGTGCTATGAAC   | CATAGCTGAGTCGGTTGCTGA   |
| Ddx39b     | GCAAAGAGATCCGCCCAGTC    | TGGTCTCGTCATCCACGAAG    |
| Gtpbp2     | TGAACCCATCTCAGTACCGC    | CATAATCCACCTCTCGCTCCC   |
| Npepl1     | GACGGGGTGTCTTACGCTTG    | TCAGGGCAGTAGACTAGCGG    |

**Table S3.** Differential gene expression in EO771 cells following miR200c restoration (p.adj. < 0.05, log2FC > 1.2).

| Genes         | log2FC | AveExpr | t      | p-Value | adj.P.Val | B     |
|---------------|--------|---------|--------|---------|-----------|-------|
| Slco2b1       | −1.58  | 0.27    | −14.40 | 0.00    | 0.000     | 10.26 |
| Gbp3          | −1.56  | −1.40   | −11.49 | 0.00    | 0.000     | 8.33  |
| Mmp2          | −1.80  | −1.86   | −12.58 | 0.00    | 0.000     | 9.12  |
| Fam214a       | −1.77  | 0.22    | −11.19 | 0.00    | 0.000     | 8.15  |
| Mndal         | −1.70  | −1.17   | −13.42 | 0.00    | 0.000     | 9.66  |
| Aldh1l1       | −1.68  | 1.19    | −12.51 | 0.00    | 0.000     | 9.47  |
| Rtp4          | −1.59  | −1.09   | −12.24 | 0.00    | 0.000     | 8.91  |
| Ifi203        | −1.41  | −1.42   | −10.71 | 0.00    | 0.000     | 7.74  |
| Aspa          | −1.40  | −1.27   | −12.87 | 0.00    | 0.000     | 9.25  |
| Capn6         | −1.32  | −1.86   | −16.57 | 0.00    | 0.000     | 11.00 |
| Mpeg1         | −1.97  | −1.27   | −12.50 | 0.00    | 0.000     | 8.97  |
| Rnase4        | −1.84  | −1.80   | −11.16 | 0.00    | 0.000     | 8.08  |
| Casp12        | −1.82  | 0.31    | −10.52 | 0.00    | 0.000     | 7.59  |
| Oas1g         | −1.80  | −1.95   | −1.16  | 0.00    | 0.000     | 6.28  |
| Dlc1          | −1.67  | 0.56    | −1.04  | 0.00    | 0.000     | 6.20  |
| Oas2          | −1.59  | −1.62   | −11.75 | 0.00    | 0.000     | 8.48  |
| Gm13373       | −1.50  | −1.90   | −1.69  | 0.00    | 0.000     | 6.79  |
| Oasl2         | −1.48  | 1.31    | −15.15 | 0.00    | 0.000     | 11.92 |
| 4631405J19Rik | −1.45  | −1.04   | −1.05  | 0.00    | 0.000     | 5.14  |
| Trim30a       | −1.32  | −1.17   | −10.85 | 0.00    | 0.000     | 7.79  |
| Irgm2         | −1.30  | −1.13   | −1.67  | 0.00    | 0.000     | 5.80  |
| 5033428I22Rik | −1.25  | −1.28   | −1.03  | 0.00    | 0.000     | 6.11  |
| Ifi2712a      | −1.17  | −1.46   | −1.27  | 0.00    | 0.000     | 4.13  |
| Agt           | −1.01  | −1.81   | −1.69  | 0.00    | 0.000     | 4.67  |
| Ypel4         | −1.88  | −1.40   | −1.81  | 0.00    | 0.000     | 6.92  |
| Slc2a6        | −1.88  | 0.25    | −12.70 | 0.00    | 0.000     | 9.34  |
| Ptgds         | −1.86  | 2.21    | −18.64 | 0.00    | 0.000     | 14.72 |
| Selenop       | −1.82  | 1.31    | −12.82 | 0.00    | 0.000     | 10.11 |
| Thrsp         | −1.80  | −1.67   | −1.97  | 0.00    | 0.000     | 7.02  |
| Prelp         | −1.80  | 1.89    | −17.36 | 0.00    | 0.000     | 13.32 |
| Ifit1         | −1.78  | −1.06   | −10.25 | 0.00    | 0.000     | 7.57  |
| Sema6d        | −1.65  | −1.03   | −1.66  | 0.00    | 0.000     | 4.59  |
| Xaf1          | −1.46  | −1.64   | −11.75 | 0.00    | 0.000     | 8.82  |
| Plxnb3        | −1.44  | −1.05   | −1.86  | 0.00    | 0.000     | 3.61  |
| Fmo1          | −1.35  | 0.68    | −14.97 | 0.00    | 0.000     | 11.39 |
| Igtp          | −1.34  | −1.11   | −1.93  | 0.00    | 0.000     | 3.70  |
| Aldh3a1       | −1.30  | −1.71   | −1.11  | 0.00    | 0.000     | 6.32  |
| Gprc5b        | −1.25  | −1.97   | −1.77  | 0.00    | 0.000     | 3.48  |
| Ctso          | −1.23  | 1.16    | −11.79 | 0.00    | 0.000     | 9.27  |
| Pla2g4a       | −1.23  | −1.32   | −1.31  | 0.00    | 0.000     | 4.18  |
| Layn          | −1.19  | 0.44    | −10.04 | 0.00    | 0.000     | 7.29  |
| Ypel2         | −1.17  | 0.95    | −11.40 | 0.00    | 0.000     | 8.81  |
| Cd69          | −1.16  | −1.98   | −1.34  | 0.00    | 0.000     | 4.18  |
| Nsd1          | −1.13  | 1.78    | −17.10 | 0.00    | 0.000     | 13.21 |
| Adgra2        | −1.11  | 1.79    | −14.84 | 0.00    | 0.000     | 11.71 |
| Pbx1          | −1.03  | −1.74   | −1.51  | 0.00    | 0.000     | 4.43  |
| Egr1          | −1.00  | 1.08    | −12.34 | 0.00    | 0.000     | 9.99  |
| Ifi44         | −1.98  | 0.04    | −13.22 | 0.00    | 0.000     | 10.33 |

|               |       |       |        |      |       |       |
|---------------|-------|-------|--------|------|-------|-------|
| Oas1b         | −1.97 | −1.91 | −1.80  | 0.00 | 0.000 | 2.08  |
| Sall2         | −1.97 | 0.32  | −10.57 | 0.00 | 0.000 | 7.99  |
| Map2k6        | −1.95 | 0.61  | −1.38  | 0.00 | 0.000 | 6.80  |
| Ifi207        | −1.90 | −1.43 | −1.23  | 0.00 | 0.000 | 2.72  |
| C1ra          | −1.88 | 3.00  | −17.85 | 0.00 | 0.000 | 14.45 |
| Irf7          | −1.83 | 0.30  | −11.54 | 0.00 | 0.000 | 9.24  |
| Gab3          | −1.80 | 0.46  | −11.45 | 0.00 | 0.000 | 8.73  |
| Acrbp         | −1.79 | −1.79 | −1.03  | 0.00 | 0.001 | 0.88  |
| Tle2          | −1.76 | 3.69  | −10.24 | 0.00 | 0.000 | 16.19 |
| Slfn2         | −1.75 | 0.15  | −1.97  | 0.00 | 0.000 | 5.15  |
| Prickle2      | −1.60 | −1.88 | −1.35  | 0.00 | 0.000 | 6.41  |
| Pik3ip1       | −1.54 | 1.69  | −15.44 | 0.00 | 0.000 | 12.43 |
| Ppargc1a      | −1.47 | −1.09 | −1.45  | 0.00 | 0.000 | 4.45  |
| Plscr4        | −1.41 | 0.05  | −1.13  | 0.00 | 0.000 | 5.38  |
| Zfr2          | −1.40 | 1.59  | −12.85 | 0.00 | 0.000 | 10.47 |
| Prtn3         | −1.39 | 3.26  | −18.58 | 0.00 | 0.000 | 15.14 |
| S100a7a       | −1.38 | −1.70 | −1.29  | 0.00 | 0.000 | 4.19  |
| Col13a1       | −1.37 | 0.13  | −10.80 | 0.00 | 0.000 | 8.18  |
| Apol9a        | −1.37 | 1.51  | −10.19 | 0.00 | 0.000 | 8.06  |
| Fabp4         | −1.36 | 0.78  | −10.05 | 0.00 | 0.000 | 7.74  |
| Sgk3          | −1.35 | 1.10  | −11.11 | 0.00 | 0.000 | 8.77  |
| Fbxo41        | −1.33 | 0.72  | −1.13  | 0.00 | 0.000 | 5.45  |
| Fkbp7         | −1.30 | 0.71  | −10.55 | 0.00 | 0.000 | 8.08  |
| 2900041M22Rik | −1.26 | 0.27  | −1.40  | 0.00 | 0.000 | 5.77  |
| Casp4         | −1.24 | 2.88  | −14.14 | 0.00 | 0.000 | 11.84 |
| Oas1a         | −1.22 | 1.72  | −12.90 | 0.00 | 0.000 | 10.64 |
| Kifc2         | −1.20 | −1.13 | −1.39  | 0.00 | 0.002 | −0.24 |
| Cetn4         | −1.19 | 0.49  | −1.17  | 0.00 | 0.000 | 5.47  |
| Calml4        | −1.17 | 0.68  | −10.06 | 0.00 | 0.000 | 7.74  |
| 1810010H24Rik | −1.14 | 1.46  | −12.82 | 0.00 | 0.000 | 10.43 |
| Gm14027       | −1.10 | −1.02 | −1.50  | 0.00 | 0.001 | 0.00  |
| Isg15         | −1.09 | 0.97  | −10.45 | 0.00 | 0.000 | 8.30  |
| Esr1          | −1.08 | 1.39  | −11.27 | 0.00 | 0.000 | 9.01  |
| Fndc5         | −1.08 | −1.76 | −1.96  | 0.00 | 0.000 | 3.84  |
| Cpeb1         | −1.05 | 1.12  | −10.31 | 0.00 | 0.000 | 7.96  |
| Lbp           | −1.04 | 2.55  | −15.60 | 0.00 | 0.000 | 13.09 |
| Rsad2         | −1.01 | 1.32  | −13.26 | 0.00 | 0.000 | 10.91 |
| Ifit3         | −1.98 | −1.41 | −1.82  | 0.00 | 0.000 | 7.24  |
| Sema6c        | −1.96 | −1.79 | −1.16  | 0.00 | 0.000 | 5.34  |
| Vwa5b1        | −1.96 | −1.01 | −1.58  | 0.00 | 0.000 | 5.86  |
| Rassf2        | −1.95 | −1.47 | −1.28  | 0.00 | 0.000 | 5.50  |
| Slfn8         | −1.94 | 0.09  | −1.14  | 0.00 | 0.000 | 2.67  |
| Lrp1          | −1.93 | 7.91  | −11.87 | 0.00 | 0.000 | 22.43 |
| Padi3         | −1.89 | 0.73  | −1.50  | 0.00 | 0.000 | 7.26  |
| Hopx          | −1.87 | 0.59  | −10.31 | 0.00 | 0.000 | 7.88  |
| Abcg2         | −1.85 | 5.19  | −16.69 | 0.00 | 0.000 | 19.98 |
| Btnl7-ps      | −1.85 | −1.70 | −1.16  | 0.00 | 0.000 | 6.66  |
| Apol9b        | −1.84 | 1.50  | −15.34 | 0.00 | 0.000 | 12.72 |
| Clec1a        | −1.83 | −1.22 | −1.92  | 0.00 | 0.000 | 3.82  |
| Ccl5          | −1.83 | −1.58 | −1.96  | 0.00 | 0.000 | 3.84  |
| Pde4d         | −1.81 | 1.12  | −1.53  | 0.00 | 0.000 | 7.18  |

|               |       |       |        |      |       |       |
|---------------|-------|-------|--------|------|-------|-------|
| Enpp2         | −1.81 | 0.64  | −1.55  | 0.00 | 0.000 | 7.16  |
| Gm7967        | −1.80 | 0.47  | −1.67  | 0.00 | 0.000 | 6.18  |
| Gm29216       | −1.79 | 5.95  | −1.44  | 0.00 | 0.000 | 6.86  |
| Sema4g        | −1.79 | 0.65  | −10.48 | 0.00 | 0.000 | 8.29  |
| Lrrc32        | −1.78 | −1.11 | −1.16  | 0.00 | 0.000 | 6.65  |
| mt-Tt         | −1.78 | −1.46 | −1.24  | 0.00 | 0.002 | −0.46 |
| C1s1          | −1.77 | 3.93  | −19.78 | 0.00 | 0.000 | 16.16 |
| Cd68          | −1.73 | 5.24  | −14.59 | 0.00 | 0.000 | 19.00 |
| Nppb          | −1.70 | 0.84  | −1.21  | 0.00 | 0.000 | 5.58  |
| Podnl1        | −1.68 | 0.18  | −1.25  | 0.00 | 0.000 | 4.30  |
| Casp1         | −1.66 | 0.03  | −1.57  | 0.00 | 0.000 | 4.69  |
| Dglucy        | −1.65 | 0.59  | −1.87  | 0.00 | 0.000 | 6.37  |
| Ddx58         | −1.64 | 3.78  | −18.32 | 0.00 | 0.000 | 15.23 |
| Adamts6       | −1.59 | 1.79  | −10.36 | 0.00 | 0.000 | 8.23  |
| Izumo4        | −1.56 | 0.39  | −1.19  | 0.00 | 0.000 | 4.24  |
| Coq8a         | −1.55 | 3.39  | −17.32 | 0.00 | 0.000 | 14.49 |
| Prrt1         | −1.55 | 0.15  | −1.96  | 0.00 | 0.000 | 6.41  |
| Tcp11l2       | −1.55 | 4.14  | −18.97 | 0.00 | 0.000 | 15.70 |
| Fxyd1         | −1.52 | 0.94  | −1.17  | 0.00 | 0.000 | 5.60  |
| mt-Co1        | −1.52 | 11.62 | −1.20  | 0.00 | 0.000 | 3.42  |
| Nr1h4         | −1.51 | −1.25 | −1.99  | 0.00 | 0.000 | 3.88  |
| Gm13340       | −1.50 | 4.62  | −1.71  | 0.00 | 0.000 | 4.66  |
| Mr1           | −1.49 | 5.32  | −14.64 | 0.00 | 0.000 | 19.06 |
| Gm36738       | −1.49 | −1.43 | −1.95  | 0.00 | 0.001 | 0.73  |
| Clec2d        | −1.48 | 0.88  | −10.24 | 0.00 | 0.000 | 7.93  |
| Ccl2          | −1.48 | 3.24  | −16.08 | 0.00 | 0.000 | 13.58 |
| 9930017N22Rik | −1.46 | 0.76  | −1.58  | 0.00 | 0.000 | 1.77  |
| Cnrip1        | −1.45 | 2.74  | −16.59 | 0.00 | 0.000 | 13.73 |
| Calcr1        | −1.43 | 0.20  | −1.02  | 0.00 | 0.000 | 6.46  |
| Zc4h2         | −1.43 | 1.40  | −10.97 | 0.00 | 0.000 | 8.81  |
| Gm43414       | −1.43 | 0.71  | −1.64  | 0.00 | 0.000 | 3.43  |
| Ccl7          | −1.43 | 0.45  | −1.48  | 0.00 | 0.000 | 4.64  |
| Sept4         | −1.41 | 3.44  | −17.69 | 0.00 | 0.000 | 14.79 |
| mt-Tw         | −1.39 | 0.33  | −1.74  | 0.00 | 0.000 | 2.05  |
| Oas3          | −1.38 | 0.54  | −12.04 | 0.00 | 0.000 | 9.93  |
| Arhgap25      | −1.33 | 0.15  | −1.19  | 0.00 | 0.000 | 4.20  |
| Sp100         | −1.31 | 2.67  | −14.44 | 0.00 | 0.000 | 12.25 |
| Clcnka        | −1.30 | −1.56 | −1.58  | 0.00 | 0.000 | 1.79  |
| Gm20342       | −1.30 | 0.52  | −1.84  | 0.00 | 0.001 | 0.51  |
| Wfdc1         | −1.29 | 4.23  | −10.87 | 0.00 | 0.000 | 16.90 |
| Epor          | −1.29 | 0.33  | −1.06  | 0.00 | 0.000 | 4.07  |
| Ing4          | −1.28 | −1.45 | −1.82  | 0.00 | 0.004 | −1.26 |
| Psd2          | −1.28 | 1.82  | −1.74  | 0.00 | 0.000 | 6.35  |
| Hebp2         | −1.26 | 0.53  | −1.61  | 0.00 | 0.000 | 6.09  |
| BC028528      | −1.25 | 2.27  | −11.49 | 0.00 | 0.000 | 9.51  |
| Gm38157       | −1.25 | −1.33 | −1.37  | 0.00 | 0.002 | −0.24 |
| Sat2          | −1.24 | 1.08  | −1.20  | 0.00 | 0.000 | 6.86  |
| Prr5          | −1.23 | 1.94  | −12.82 | 0.00 | 0.000 | 10.74 |
| Napsa         | −1.21 | 3.52  | −15.63 | 0.00 | 0.000 | 13.27 |
| Ssu2          | −1.20 | 0.21  | −1.79  | 0.00 | 0.000 | 3.66  |
| Mkln1os       | −1.20 | −1.19 | −1.99  | 0.00 | 0.000 | 2.44  |

|               |       |       |        |      |       |       |
|---------------|-------|-------|--------|------|-------|-------|
| Gm8899        | −1.19 | −1.57 | −1.58  | 0.00 | 0.000 | 1.78  |
| Gm35019       | −1.17 | 0.37  | −1.01  | 0.00 | 0.001 | 0.83  |
| Tmem191c      | −1.17 | 0.33  | −1.06  | 0.00 | 0.000 | 5.42  |
| Poln          | −1.16 | −1.04 | −1.55  | 0.00 | 0.000 | 4.68  |
| Fas           | −1.15 | 0.24  | −1.25  | 0.00 | 0.000 | 4.31  |
| Edn2          | −1.14 | 1.16  | −1.60  | 0.00 | 0.000 | 7.39  |
| Adh1          | −1.12 | −1.52 | −1.58  | 0.00 | 0.000 | 3.31  |
| Mir142hg      | −1.12 | −1.67 | −1.25  | 0.00 | 0.002 | −0.44 |
| Fbxl21        | −1.08 | 0.42  | −1.93  | 0.00 | 0.000 | 6.48  |
| 1110046J04Rik | −1.08 | 1.25  | −10.28 | 0.00 | 0.000 | 8.07  |
| Ifi209        | −1.08 | 0.90  | −1.02  | 0.00 | 0.000 | 5.37  |
| Gm37261       | −1.08 | −1.34 | −1.50  | 0.00 | 0.001 | −0.04 |
| Gm42636       | −1.07 | −1.38 | −1.88  | 0.00 | 0.004 | −1.12 |
| Fmo5          | −1.06 | −1.35 | −1.91  | 0.00 | 0.000 | 3.82  |
| Cmpk2         | −1.05 | −1.61 | −1.63  | 0.00 | 0.000 | 3.42  |
| Tceal1        | −1.05 | 0.48  | −1.95  | 0.00 | 0.000 | 5.28  |
| Gstm6         | −1.04 | 1.22  | −1.63  | 0.00 | 0.000 | 6.19  |
| Isoc2b        | −1.04 | 1.53  | −11.60 | 0.00 | 0.000 | 9.55  |
| Dhx58         | −1.04 | 2.36  | −10.94 | 0.00 | 0.000 | 8.94  |
| Plekha4       | −1.00 | 0.26  | −1.08  | 0.00 | 0.000 | 6.65  |
| Glpr1         | −1.00 | 3.98  | −15.88 | 0.00 | 0.000 | 13.50 |
| Parp14        | −1.00 | 2.02  | −13.40 | 0.00 | 0.000 | 11.35 |
| Col2a1        | −1.00 | 2.99  | −1.30  | 0.00 | 0.000 | 5.71  |
| Rnf207        | −1.00 | −1.04 | −1.99  | 0.00 | 0.000 | 6.50  |
| Mir7688       | −1.99 | 0.09  | −1.55  | 0.00 | 0.001 | 0.03  |
| H2-K2         | −1.97 | 1.86  | −1.88  | 0.00 | 0.000 | 5.21  |
| Apobec1       | −1.97 | 2.65  | −11.41 | 0.00 | 0.000 | 9.43  |
| Ndufa4l2      | −1.95 | −1.19 | −1.96  | 0.00 | 0.000 | 2.39  |
| 1700001J03Rik | −1.92 | −1.62 | −1.86  | 0.01 | 0.022 | −2.94 |
| Lnx1          | −1.92 | 1.34  | −1.01  | 0.00 | 0.000 | 6.67  |
| Sept12        | −1.91 | −1.28 | −1.24  | 0.00 | 0.000 | 1.23  |
| Chrd          | −1.90 | 2.20  | −13.48 | 0.00 | 0.000 | 11.36 |
| Lamb2         | −1.89 | 6.77  | −17.01 | 0.00 | 0.000 | 20.31 |
| Mir5125       | −1.89 | 2.36  | −1.47  | 0.00 | 0.000 | 4.61  |
| Gm28578       | −1.88 | 0.90  | −1.58  | 0.00 | 0.000 | 1.72  |
| Nod1          | −1.87 | 2.71  | −12.24 | 0.00 | 0.000 | 10.28 |
| Prdm11        | −1.86 | −1.16 | −1.99  | 0.00 | 0.000 | 3.95  |
| Zscan10       | −1.86 | 0.27  | −1.48  | 0.00 | 0.000 | 4.65  |
| 4930550C14Rik | −1.85 | −1.30 | −1.15  | 0.00 | 0.000 | 4.12  |
| Gstt1         | −1.85 | 5.88  | −17.72 | 0.00 | 0.000 | 20.62 |
| Mfsd7a        | −1.85 | 0.85  | −1.75  | 0.00 | 0.000 | 3.61  |
| Slc6a4        | −1.85 | −1.24 | −1.68  | 0.00 | 0.000 | 4.90  |
| Gm28661       | −1.84 | 5.98  | −1.33  | 0.00 | 0.000 | 2.21  |
| mt-Co3        | −1.83 | 5.64  | −1.47  | 0.00 | 0.000 | 2.53  |
| Gstk1         | −1.82 | 0.49  | −1.30  | 0.00 | 0.000 | 1.31  |
| Ebf4          | −1.81 | 1.31  | −11.62 | 0.00 | 0.000 | 9.53  |
| Ankrd44       | −1.81 | 2.80  | −13.54 | 0.00 | 0.000 | 11.48 |
| Psmb9         | −1.81 | 2.29  | −11.34 | 0.00 | 0.000 | 9.35  |
| Serpinb8      | −1.80 | 0.21  | −1.94  | 0.00 | 0.000 | 3.88  |
| Gm5751        | −1.80 | 0.66  | −1.44  | 0.00 | 0.000 | 1.50  |
| Cbr1          | −1.80 | −1.06 | −1.89  | 0.00 | 0.000 | 2.28  |

|               |       |       |        |      |       |       |
|---------------|-------|-------|--------|------|-------|-------|
| Dlg4          | -1.79 | 4.11  | -19.89 | 0.00 | 0.000 | 16.30 |
| Sept1         | -1.79 | -1.26 | -1.71  | 0.00 | 0.001 | 0.33  |
| Ncf4          | -1.78 | 1.03  | -1.70  | 0.00 | 0.000 | 6.28  |
| Ggt7          | -1.78 | 0.49  | -1.23  | 0.00 | 0.000 | 5.65  |
| Smarca2       | -1.77 | 0.76  | -1.73  | 0.00 | 0.000 | 5.00  |
| Icam1         | -1.77 | 2.97  | -14.43 | 0.00 | 0.000 | 12.30 |
| Gm49492       | -1.77 | -1.33 | -1.32  | 0.00 | 0.000 | 2.94  |
| Tcn2          | -1.76 | 4.36  | -19.80 | 0.00 | 0.000 | 16.29 |
| AC079441.1    | -1.76 | -1.02 | -1.05  | 0.00 | 0.000 | 2.53  |
| Enox1         | -1.75 | 0.53  | -1.70  | 0.00 | 0.000 | 3.53  |
| Mmp28         | -1.74 | 3.24  | -16.90 | 0.00 | 0.000 | 14.23 |
| Pde5a         | -1.74 | 0.29  | -1.77  | 0.00 | 0.000 | 5.02  |
| AC122252.2    | -1.73 | 2.52  | -1.90  | 0.00 | 0.000 | 2.07  |
| Ppm1k         | -1.73 | 3.71  | -12.41 | 0.00 | 0.000 | 10.44 |
| Ablim3        | -1.72 | 1.35  | -1.71  | 0.00 | 0.000 | 4.98  |
| Macrocl1      | -1.72 | 4.65  | -17.94 | 0.00 | 0.000 | 15.05 |
| Wnk4          | -1.72 | 2.76  | -12.24 | 0.00 | 0.000 | 10.28 |
| Stard9        | -1.71 | 2.32  | -1.03  | 0.00 | 0.000 | 5.36  |
| Tmem150a      | -1.69 | 3.91  | -14.41 | 0.00 | 0.000 | 12.29 |
| Malat1        | -1.68 | 7.78  | -1.19  | 0.00 | 0.002 | -1.86 |
| Fcgrt         | -1.68 | 4.99  | -13.08 | 0.00 | 0.000 | 18.26 |
| Ccdc17        | -1.68 | -1.13 | -1.01  | 0.00 | 0.001 | 0.81  |
| mt-Co2        | -1.68 | 6.20  | -1.22  | 0.00 | 0.000 | 1.98  |
| Cxcl10        | -1.68 | -1.12 | -1.03  | 0.00 | 0.000 | 4.00  |
| Foxl1         | -1.68 | 1.74  | -1.02  | 0.00 | 0.000 | 6.70  |
| Uba7          | -1.68 | -1.09 | -1.65  | 0.00 | 0.000 | 4.88  |
| Klf8          | -1.67 | 1.86  | -1.45  | 0.00 | 0.000 | 4.60  |
| Padi2         | -1.67 | 0.59  | -1.06  | 0.00 | 0.000 | 5.44  |
| 9330102E08Rik | -1.66 | 1.88  | -11.67 | 0.00 | 0.000 | 9.64  |
| 1700109H08Rik | -1.66 | -1.81 | -1.59  | 0.02 | 0.035 | -3.38 |
| 3110039I08Rik | -1.66 | 1.73  | -1.79  | 0.00 | 0.000 | 3.62  |
| Zfp607b       | -1.65 | -1.26 | -1.17  | 0.00 | 0.000 | 1.09  |
| Gm28437       | -1.64 | 5.62  | -1.87  | 0.00 | 0.000 | 3.16  |
| Slc9a9        | -1.63 | 1.71  | -11.28 | 0.00 | 0.000 | 9.26  |
| Hspa12b       | -1.62 | 3.36  | -15.94 | 0.00 | 0.000 | 13.53 |
| Lipa          | -1.62 | 4.63  | -11.69 | 0.00 | 0.000 | 17.44 |
| Lhfp          | -1.62 | 5.04  | -18.48 | 0.00 | 0.000 | 15.43 |
| Myh7b         | -1.62 | 0.20  | -1.64  | 0.00 | 0.001 | 0.14  |
| Ankrd24       | -1.61 | 4.15  | -13.40 | 0.00 | 0.000 | 11.37 |
| Tmem71        | -1.61 | 2.12  | -10.24 | 0.00 | 0.000 | 8.16  |
| Pde4c         | -1.60 | 0.32  | -1.78  | 0.00 | 0.001 | 0.41  |
| Gm45494       | -1.60 | -1.24 | -1.73  | 0.00 | 0.000 | 2.02  |
| Zcchc24       | -1.60 | 6.32  | -19.59 | 0.00 | 0.000 | 21.46 |
| Mgl1          | -1.60 | -1.36 | -1.80  | 0.00 | 0.000 | 2.13  |
| Ndr4          | -1.59 | 3.23  | -11.51 | 0.00 | 0.000 | 9.55  |
| H2-DMA        | -1.59 | 3.31  | -14.06 | 0.00 | 0.000 | 11.98 |
| Ifih1         | -1.59 | 1.93  | -11.99 | 0.00 | 0.000 | 10.00 |
| Mid1ip1       | -1.59 | 0.23  | -1.06  | 0.00 | 0.001 | 0.89  |
| Ifi211        | -1.59 | 2.07  | -10.41 | 0.00 | 0.000 | 8.34  |
| Meiob         | -1.58 | 0.10  | -1.52  | 0.00 | 0.000 | 4.66  |
| Mapk4         | -1.57 | -1.12 | -1.77  | 0.00 | 0.000 | 5.03  |

|               |       |       |        |      |       |       |
|---------------|-------|-------|--------|------|-------|-------|
| Stac3         | −1.57 | 2.08  | −11.96 | 0.00 | 0.000 | 9.97  |
| Kdm7a         | −1.57 | 5.45  | −16.06 | 0.00 | 0.000 | 13.61 |
| Acyp1         | −1.57 | 3.75  | −11.27 | 0.00 | 0.000 | 9.25  |
| Tfr2          | −1.56 | 0.01  | −1.30  | 0.00 | 0.000 | 2.92  |
| Ifi27         | −1.56 | 5.04  | −12.46 | 0.00 | 0.000 | 17.92 |
| Lpin1         | −1.55 | 3.96  | −14.03 | 0.00 | 0.000 | 11.96 |
| Ahnak2        | −1.55 | 6.23  | −15.83 | 0.00 | 0.000 | 13.35 |
| Tmem140       | −1.55 | 1.00  | −1.96  | 0.00 | 0.000 | 6.64  |
| Nos3          | −1.54 | −1.37 | −1.19  | 0.00 | 0.000 | 1.14  |
| Ifi204        | −1.54 | 2.25  | −1.81  | 0.00 | 0.000 | 7.67  |
| Vwf           | −1.54 | 0.26  | −1.71  | 0.00 | 0.000 | 6.26  |
| Lipn          | −1.53 | 0.17  | −1.44  | 0.00 | 0.000 | 1.53  |
| Slc25a27      | −1.53 | 2.67  | −1.07  | 0.00 | 0.000 | 5.42  |
| Naglu         | −1.53 | 4.85  | −16.87 | 0.00 | 0.000 | 14.26 |
| Hacd4         | −1.52 | 0.11  | −1.07  | 0.00 | 0.000 | 4.07  |
| Irf9          | −1.52 | 3.70  | −18.77 | 0.00 | 0.000 | 15.60 |
| Gm15832       | −1.52 | −1.02 | −1.14  | 0.00 | 0.001 | 1.05  |
| Arhgap18      | −1.51 | 5.84  | −12.89 | 0.00 | 0.000 | 18.17 |
| Xkr8          | −1.51 | 2.37  | −1.79  | 0.00 | 0.000 | 7.65  |
| Slc5a5        | −1.51 | 1.46  | −1.56  | 0.00 | 0.000 | 7.36  |
| Pold4         | −1.51 | 4.10  | −16.51 | 0.00 | 0.000 | 13.99 |
| Fgd2          | −1.50 | 1.15  | −1.78  | 0.00 | 0.000 | 7.61  |
| Azin2         | −1.50 | 2.24  | −1.18  | 0.00 | 0.000 | 5.58  |
| Ilvbl         | −1.50 | 4.25  | −13.53 | 0.00 | 0.000 | 11.48 |
| Adgrd1        | −1.50 | 0.58  | −1.26  | 0.00 | 0.000 | 5.71  |
| Apcdd1        | −1.50 | 2.14  | −11.23 | 0.00 | 0.000 | 9.22  |
| Dnm1          | −1.50 | 4.47  | −14.66 | 0.00 | 0.000 | 12.48 |
| Loxl3         | −1.50 | −1.39 | −1.04  | 0.00 | 0.001 | 0.88  |
| mt-Atp6       | −1.50 | 6.72  | −1.00  | 0.00 | 0.000 | 1.54  |
| Cyp39a1       | −1.49 | 2.40  | −11.47 | 0.00 | 0.000 | 9.51  |
| Sesn1         | −1.49 | 4.57  | −17.50 | 0.00 | 0.000 | 14.73 |
| Rmdn1         | −1.49 | 1.17  | −1.26  | 0.00 | 0.000 | 4.33  |
| Asb2          | −1.49 | −1.05 | −1.28  | 0.00 | 0.000 | 1.24  |
| Des           | −1.49 | 2.11  | −10.90 | 0.00 | 0.000 | 8.89  |
| Selenbp1      | −1.48 | 4.17  | −14.84 | 0.00 | 0.000 | 12.62 |
| Il2rg         | −1.47 | 0.43  | −1.88  | 0.00 | 0.000 | 3.81  |
| 1700003E16Rik | −1.46 | −1.24 | −1.31  | 0.01 | 0.010 | −2.25 |
| mt-Rnr2       | −1.46 | 8.03  | −1.55  | 0.00 | 0.000 | 0.67  |
| Gm43858       | −1.45 | 0.08  | −1.49  | 0.00 | 0.007 | −1.89 |
| 1190001M18Rik | −1.45 | −1.28 | −1.64  | 0.00 | 0.000 | 1.89  |
| Adamts7       | −1.45 | 4.07  | −14.61 | 0.00 | 0.000 | 12.46 |
| Inca1         | −1.44 | 0.78  | −1.05  | 0.00 | 0.000 | 4.05  |
| Slc28a2       | −1.44 | 0.81  | −1.09  | 0.00 | 0.000 | 5.49  |
| Gm10925       | −1.43 | 7.08  | −1.55  | 0.00 | 0.000 | 0.72  |
| Haghl         | −1.43 | 2.34  | −1.39  | 0.00 | 0.000 | 4.44  |
| Ccno          | −1.43 | 1.72  | −1.12  | 0.00 | 0.000 | 6.83  |
| Lyz2          | −1.43 | 3.05  | −14.41 | 0.00 | 0.000 | 12.27 |
| Dqx1          | −1.42 | 1.03  | −1.46  | 0.00 | 0.001 | −0.25 |
| Kctd14        | −1.42 | 2.45  | −12.94 | 0.00 | 0.000 | 10.94 |
| Ovgp1         | −1.41 | 0.68  | −1.86  | 0.00 | 0.000 | 2.22  |
| Plxna3        | −1.41 | 4.31  | −10.86 | 0.00 | 0.000 | 8.72  |

|               |       |       |        |      |       |       |
|---------------|-------|-------|--------|------|-------|-------|
| Pramef12      | −1.40 | 2.14  | −10.51 | 0.00 | 0.000 | 8.46  |
| Nxph4         | −1.39 | 2.78  | −10.72 | 0.00 | 0.000 | 8.69  |
| Aqp1          | −1.38 | 1.41  | −1.84  | 0.00 | 0.000 | 6.47  |
| Cdc42ep5      | −1.38 | 3.56  | −11.67 | 0.00 | 0.000 | 9.67  |
| Sp7           | −1.37 | −1.14 | −1.89  | 0.00 | 0.000 | 2.28  |
| Naga          | −1.37 | 5.50  | −14.12 | 0.00 | 0.000 | 11.91 |
| Vsir          | −1.37 | 4.90  | −12.33 | 0.00 | 0.000 | 17.84 |
| Lhx9          | −1.37 | 2.76  | −11.84 | 0.00 | 0.000 | 9.89  |
| Sh2d3c        | −1.36 | 2.21  | −1.34  | 0.00 | 0.000 | 7.10  |
| Rab19         | −1.36 | −1.33 | −1.09  | 0.00 | 0.003 | −0.79 |
| Dcxr          | −1.36 | 2.23  | −10.39 | 0.00 | 0.000 | 8.34  |
| Ccdc159       | −1.35 | 1.26  | −1.93  | 0.00 | 0.000 | 2.26  |
| Ajm1          | −1.35 | 1.90  | −1.43  | 0.00 | 0.000 | 7.21  |
| 1700013F07Rik | −1.35 | 1.69  | −1.21  | 0.00 | 0.000 | 5.67  |
| Rgl1          | −1.34 | 3.11  | −12.97 | 0.00 | 0.000 | 10.99 |
| Celf5         | −1.33 | 1.13  | −1.02  | 0.00 | 0.000 | 5.39  |
| AC154187.1    | −1.33 | 0.42  | −1.19  | 0.00 | 0.000 | 2.74  |
| Pla2g16       | −1.33 | 1.00  | −1.73  | 0.00 | 0.000 | 5.02  |
| Klhl24        | −1.32 | 4.42  | −11.51 | 0.00 | 0.000 | 9.41  |
| Hectd2        | −1.32 | 0.35  | −1.20  | 0.00 | 0.000 | 1.15  |
| 1700120G11Rik | −1.32 | −1.13 | −1.16  | 0.00 | 0.000 | 1.09  |
| Cx3cl1        | −1.32 | 1.17  | −1.24  | 0.00 | 0.000 | 5.70  |
| Mxd4          | −1.32 | 5.30  | −11.05 | 0.00 | 0.000 | 17.09 |
| Gm15867       | −1.31 | 1.65  | −1.22  | 0.00 | 0.000 | 6.96  |
| Lif           | −1.31 | 1.53  | −1.89  | 0.00 | 0.000 | 3.79  |
| Tjp3          | −1.30 | −1.11 | −1.88  | 0.00 | 0.000 | 3.80  |
| Cabp1         | −1.29 | 3.58  | −11.19 | 0.00 | 0.000 | 9.17  |
| 1700034P13Rik | −1.29 | 0.63  | −1.37  | 0.00 | 0.000 | 3.02  |
| Mogat2        | −1.29 | 2.81  | −12.19 | 0.00 | 0.000 | 10.24 |
| Eno2          | −1.29 | 2.68  | −1.59  | 0.00 | 0.000 | 7.39  |
| Foxn3         | −1.28 | 3.62  | −13.54 | 0.00 | 0.000 | 11.52 |
| Acta2         | −1.28 | 2.97  | −10.34 | 0.00 | 0.000 | 8.27  |
| Rnf122        | −1.28 | 2.04  | −1.36  | 0.00 | 0.000 | 7.12  |
| Sept5         | −1.28 | 0.53  | −1.48  | 0.00 | 0.000 | 4.66  |
| Mxra8         | −1.28 | 6.68  | −11.32 | 0.00 | 0.000 | 17.24 |
| A730063M14Rik | −1.27 | −1.07 | −1.08  | 0.00 | 0.001 | 0.96  |
| mt-Rnr1       | −1.27 | 7.14  | −1.27  | 0.00 | 0.000 | 0.20  |
| Rras          | −1.27 | 5.81  | −15.84 | 0.00 | 0.000 | 13.38 |
| Bcl1          | −1.27 | 7.50  | −1.65  | 0.00 | 0.000 | 0.86  |
| Ramp2         | −1.26 | 2.74  | −11.03 | 0.00 | 0.000 | 9.04  |
| Zeb2          | −1.25 | 5.38  | −11.27 | 0.00 | 0.000 | 9.06  |
| AI413582      | −1.24 | 5.47  | −14.88 | 0.00 | 0.000 | 12.59 |
| Mertk         | −1.24 | 3.72  | −10.20 | 0.00 | 0.000 | 8.00  |
| Nxf3          | −1.24 | 6.12  | −11.38 | 0.00 | 0.000 | 9.08  |
| Mill2         | −1.24 | 0.78  | −1.58  | 0.00 | 0.000 | 3.34  |
| Nnmt          | −1.23 | 1.80  | −1.63  | 0.00 | 0.000 | 4.87  |
| Ddb2          | −1.23 | 3.24  | −10.98 | 0.00 | 0.000 | 8.96  |
| Pcmdt1        | −1.22 | 4.97  | −14.01 | 0.00 | 0.000 | 11.86 |
| Rdh5          | −1.22 | 1.18  | −1.15  | 0.00 | 0.000 | 2.64  |
| 4933430I17Rik | −1.22 | −1.07 | −1.10  | 0.00 | 0.000 | 4.12  |
| Stat2         | −1.22 | 4.12  | −17.33 | 0.00 | 0.000 | 14.61 |



|               |       |       |        |      |       |       |
|---------------|-------|-------|--------|------|-------|-------|
| Cdh13         | −1.22 | 6.54  | −12.16 | 0.00 | 0.000 | 17.75 |
| 4933412E12Rik | −1.21 | 0.36  | −1.77  | 0.00 | 0.000 | 3.63  |
| Frat2         | −1.21 | 2.46  | −12.68 | 0.00 | 0.000 | 10.70 |
| Fos           | −1.21 | 0.67  | −1.51  | 0.00 | 0.000 | 1.59  |
| Gm5930        | −1.21 | 2.13  | −1.04  | 0.00 | 0.000 | 6.73  |
| Entpd7        | −1.21 | 4.78  | −11.47 | 0.00 | 0.000 | 9.34  |
| Nod2          | −1.20 | −1.05 | −1.98  | 0.00 | 0.001 | 0.78  |
| Usp44         | −1.20 | −1.08 | −1.47  | 0.00 | 0.000 | 1.61  |
| Mmd           | −1.19 | 1.48  | −1.41  | 0.00 | 0.000 | 4.55  |
| Dtx3          | −1.19 | 6.18  | −15.24 | 0.00 | 0.000 | 12.84 |
| Syde1         | −1.19 | 5.80  | −10.38 | 0.00 | 0.000 | 16.67 |
| Fhl4          | −1.19 | 0.27  | −1.30  | 0.00 | 0.000 | 2.92  |
| 1810021B22Rik | −1.19 | −1.06 | −1.27  | 0.00 | 0.000 | 2.88  |
| Vamp5         | −1.18 | 3.41  | −13.05 | 0.00 | 0.000 | 11.06 |
| Trim12c       | −1.18 | 0.01  | −1.18  | 0.00 | 0.000 | 4.24  |
| Bex2          | −1.18 | −1.40 | −1.02  | 0.01 | 0.017 | −2.71 |
| H2-M3         | −1.17 | 0.78  | −1.63  | 0.00 | 0.000 | 1.83  |
| Adamtsl4      | −1.17 | 3.50  | −11.05 | 0.00 | 0.000 | 9.02  |
| Itga7         | −1.17 | 2.97  | −12.23 | 0.00 | 0.000 | 10.28 |
| Ptpn22        | −1.16 | 0.75  | −1.85  | 0.00 | 0.000 | 2.14  |
| Plekhg6       | −1.16 | 0.39  | −1.12  | 0.00 | 0.000 | 2.64  |
| Fhod1         | −1.16 | 5.60  | −10.19 | 0.00 | 0.000 | 16.55 |
| Gm10457       | −1.16 | −1.13 | −1.15  | 0.00 | 0.002 | −0.70 |
| Eva1b         | −1.16 | 5.11  | −15.56 | 0.00 | 0.000 | 13.17 |
| Samd9l        | −1.15 | 4.42  | −19.29 | 0.00 | 0.000 | 15.97 |
| Ube2l6        | −1.15 | 1.26  | −1.35  | 0.00 | 0.000 | 4.46  |
| Gm17491       | −1.15 | 2.14  | −1.38  | 0.00 | 0.000 | 1.21  |
| Ripk2         | −1.15 | 3.85  | −11.78 | 0.00 | 0.000 | 9.78  |
| Me3           | −1.15 | 2.49  | −10.97 | 0.00 | 0.000 | 8.97  |
| Dbn1          | −1.15 | 3.72  | −12.91 | 0.00 | 0.000 | 10.92 |
| H2-K1         | −1.15 | 6.97  | −17.75 | 0.00 | 0.000 | 14.81 |
| Catsperg1     | −1.14 | 0.45  | −1.92  | 0.00 | 0.001 | 0.63  |
| Rn7sk         | −1.14 | 1.96  | −1.78  | 0.00 | 0.001 | 0.18  |
| Bach2         | −1.14 | 0.20  | −1.76  | 0.00 | 0.000 | 3.62  |
| Gm37499       | −1.14 | 0.54  | −1.61  | 0.00 | 0.000 | 1.81  |
| Rnasel        | −1.14 | 3.04  | −1.34  | 0.00 | 0.000 | 7.02  |
| Fam193b       | −1.14 | 5.96  | −12.33 | 0.00 | 0.000 | 10.12 |
| Dennd5a       | −1.14 | 6.53  | −10.47 | 0.00 | 0.000 | 16.71 |
| Nckap5l       | −1.13 | 3.85  | −15.15 | 0.00 | 0.000 | 12.92 |
| Acsl6         | −1.13 | 5.20  | −18.18 | 0.00 | 0.000 | 15.21 |
| Ppm1j         | −1.13 | 3.53  | −14.10 | 0.00 | 0.000 | 12.03 |
| Rorc          | −1.12 | 4.35  | −18.22 | 0.00 | 0.000 | 15.25 |
| Vstm5         | −1.12 | 0.67  | −1.09  | 0.00 | 0.001 | 0.91  |
| Atp8b3        | −1.12 | 0.08  | −1.99  | 0.00 | 0.000 | 3.95  |
| Aldh6a1       | −1.12 | 3.43  | −1.73  | 0.00 | 0.000 | 7.46  |
| 4930539E08Rik | −1.11 | 1.60  | −1.34  | 0.00 | 0.000 | 5.84  |
| Slc7a7        | −1.11 | 3.63  | −13.82 | 0.00 | 0.000 | 11.77 |
| Tet1          | −1.11 | 0.17  | −1.28  | 0.00 | 0.000 | 1.25  |
| Usp35         | −1.11 | 2.18  | −1.56  | 0.00 | 0.000 | 7.36  |
| G730013B05Rik | −1.11 | 4.73  | −17.49 | 0.00 | 0.000 | 14.72 |
| Fam49a        | −1.10 | 3.15  | −13.27 | 0.00 | 0.000 | 11.28 |

|               |       |       |        |      |       |       |
|---------------|-------|-------|--------|------|-------|-------|
| Lrrc74b       | −1.10 | −1.11 | −1.43  | 0.00 | 0.000 | 3.11  |
| 4933439C10Rik | −1.10 | 1.44  | −1.61  | 0.00 | 0.000 | 1.74  |
| Trim21        | −1.09 | 1.08  | −1.55  | 0.00 | 0.000 | 4.74  |
| Gbp2          | −1.09 | −1.39 | −1.92  | 0.00 | 0.001 | 0.63  |
| Arap3         | −1.09 | 4.00  | −14.13 | 0.00 | 0.000 | 12.03 |
| Csad          | −1.09 | 2.90  | −11.19 | 0.00 | 0.000 | 9.20  |
| C230037L18Rik | −1.09 | 0.57  | −1.28  | 0.00 | 0.000 | 1.24  |
| Pdk2          | −1.09 | 3.50  | −13.26 | 0.00 | 0.000 | 11.26 |
| Gm13341       | −1.08 | 0.63  | −1.74  | 0.00 | 0.005 | −1.53 |
| Gm15421       | −1.07 | 0.27  | −1.03  | 0.00 | 0.001 | 0.84  |
| Znrf1         | −1.07 | 5.90  | −15.90 | 0.00 | 0.000 | 13.42 |
| Stat1         | −1.07 | 3.48  | −14.99 | 0.00 | 0.000 | 12.78 |
| Nptx1         | −1.07 | 6.10  | −10.07 | 0.00 | 0.000 | 16.46 |
| Arl4d         | −1.07 | 2.41  | −1.31  | 0.00 | 0.000 | 5.75  |
| Zfp30         | −1.06 | 2.46  | −10.95 | 0.00 | 0.000 | 8.95  |
| Tsga10        | −1.06 | 0.58  | −1.91  | 0.00 | 0.000 | 2.27  |
| Cyp27a1       | −1.05 | 4.59  | −12.66 | 0.00 | 0.000 | 10.59 |
| Vdr           | −1.05 | 2.66  | −1.62  | 0.00 | 0.000 | 7.40  |
| mt-Cytb       | −1.05 | 10.61 | −1.53  | 0.00 | 0.001 | −1.25 |
| Gimap6        | −1.04 | 0.99  | −1.87  | 0.00 | 0.000 | 2.19  |
| Gm46404       | −1.04 | 1.45  | −1.49  | 0.00 | 0.000 | 4.67  |
| Zeb1          | −1.04 | 5.25  | −14.09 | 0.00 | 0.000 | 11.91 |
| C2            | −1.04 | 3.06  | −11.07 | 0.00 | 0.000 | 9.05  |
| Ccn5          | −1.03 | 2.28  | −11.03 | 0.00 | 0.000 | 9.02  |
| Thra          | −1.03 | 5.89  | −10.95 | 0.00 | 0.000 | 17.03 |
| Ppp1r12b      | −1.02 | 4.54  | −12.05 | 0.00 | 0.000 | 9.98  |
| E130307A14Rik | −1.02 | 0.87  | −1.32  | 0.00 | 0.000 | 1.27  |
| Sele          | −1.02 | 0.57  | −1.55  | 0.00 | 0.000 | 3.29  |
| Slc25a28      | −1.02 | 6.71  | −13.38 | 0.00 | 0.000 | 11.12 |
| Zfp14         | −1.01 | 0.54  | −1.60  | 0.00 | 0.000 | 3.37  |
| Alx3          | −1.01 | −1.12 | −1.86  | 0.00 | 0.004 | −1.24 |
| Akap7         | −1.01 | 4.71  | −15.41 | 0.00 | 0.000 | 13.10 |
| Stau2         | −1.01 | 3.27  | −11.46 | 0.00 | 0.000 | 9.47  |
| Papln         | −1.01 | −1.25 | −1.29  | 0.00 | 0.002 | −0.49 |
| Flot1         | −1.01 | 7.21  | −12.50 | 0.00 | 0.000 | 17.93 |
| H3f3aos       | −1.01 | 0.36  | −1.57  | 0.00 | 0.000 | 1.74  |
| Cbr2          | −1.01 | 3.96  | −15.03 | 0.00 | 0.000 | 12.81 |
| Phf1          | −1.01 | 5.15  | −17.70 | 0.00 | 0.000 | 14.85 |
| Gm14443       | −1.01 | −1.16 | −1.18  | 0.00 | 0.002 | −0.68 |
| Rwdd3         | −1.01 | 2.19  | −1.82  | 0.00 | 0.000 | 5.07  |
| Hnrnph3       | −1.00 | 4.94  | −13.45 | 0.00 | 0.000 | 11.35 |
| Izumo1        | −1.00 | 1.17  | −1.68  | 0.00 | 0.000 | 1.85  |
| Lims2         | −1.00 | 4.39  | −13.78 | 0.00 | 0.000 | 11.68 |
| Tmod1         | −1.00 | 2.96  | −12.15 | 0.00 | 0.000 | 10.19 |
| Crebrf        | −1.99 | 4.50  | −12.69 | 0.00 | 0.000 | 10.63 |
| Hyi           | −1.99 | 4.04  | −10.31 | 0.00 | 0.000 | 8.09  |
| Msn           | −1.99 | 9.06  | −11.55 | 0.00 | 0.000 | 17.35 |
| Gm14267       | −1.99 | 1.40  | −1.55  | 0.00 | 0.000 | 6.11  |
| Ghdc          | −1.99 | 3.82  | −14.23 | 0.00 | 0.000 | 12.13 |
| Rasgrp2       | −1.99 | −1.19 | −1.46  | 0.00 | 0.000 | 3.17  |
| Gabbr1        | −1.99 | 2.96  | −1.45  | 0.00 | 0.000 | 2.87  |

|                |       |       |        |      |       |       |
|----------------|-------|-------|--------|------|-------|-------|
| Tmem205        | −1.99 | 4.42  | −13.55 | 0.00 | 0.000 | 11.47 |
| Slc2a9         | −1.98 | 2.71  | −1.69  | 0.00 | 0.000 | 7.49  |
| Il11ra1        | −1.98 | 2.88  | −10.86 | 0.00 | 0.000 | 8.83  |
| Tcea3          | −1.97 | 2.05  | −1.75  | 0.00 | 0.000 | 6.33  |
| Mical1         | −1.97 | 4.53  | −16.30 | 0.00 | 0.000 | 13.82 |
| Metap1d        | −1.97 | 3.15  | −1.92  | 0.00 | 0.000 | 7.74  |
| Hoxc8          | −1.97 | 2.21  | −1.70  | 0.00 | 0.005 | −1.89 |
| Lrrc51         | −1.97 | 1.57  | −1.69  | 0.00 | 0.000 | 4.94  |
| Gm34248        | −1.96 | −1.55 | −1.87  | 0.01 | 0.022 | −2.94 |
| Adamts10       | −1.96 | 3.78  | −11.27 | 0.00 | 0.000 | 9.21  |
| 1700025G04Rik  | −1.95 | 1.96  | −1.45  | 0.00 | 0.000 | 4.56  |
| Hexb           | −1.95 | 5.15  | −16.33 | 0.00 | 0.000 | 13.81 |
| Mapk8ip3       | −1.95 | 6.59  | −1.18  | 0.00 | 0.000 | 4.97  |
| Pdlim4         | −1.95 | 5.99  | −13.98 | 0.00 | 0.000 | 11.72 |
| Gm17501        | −1.95 | 0.47  | −1.88  | 0.00 | 0.000 | 2.24  |
| Neil1          | −1.95 | 3.27  | −10.62 | 0.00 | 0.000 | 8.54  |
| Rapgef11       | −1.95 | 0.78  | −1.76  | 0.00 | 0.000 | 5.05  |
| Fbxo32         | −1.94 | 3.98  | −16.79 | 0.00 | 0.000 | 14.21 |
| B230303O12Rik  | −1.94 | 1.92  | −1.73  | 0.00 | 0.005 | −1.77 |
| AC149090.1     | −1.94 | 7.42  | −12.75 | 0.00 | 0.000 | 10.45 |
| Gm26885        | −1.94 | −1.21 | −1.37  | 0.00 | 0.009 | −2.14 |
| Hist1h3c       | −1.94 | −1.08 | −1.21  | 0.00 | 0.002 | −0.58 |
| Arhgef4        | −1.93 | 1.66  | −1.92  | 0.00 | 0.000 | 3.78  |
| Zfp429         | −1.93 | 1.91  | −1.17  | 0.00 | 0.000 | 6.90  |
| Ccp1           | −1.92 | 0.59  | −1.17  | 0.00 | 0.000 | 2.70  |
| Appl2          | −1.92 | 5.64  | −15.74 | 0.00 | 0.000 | 13.30 |
| Tecpr1         | −1.91 | 6.52  | −17.24 | 0.00 | 0.000 | 14.44 |
| Ppox           | −1.91 | 4.73  | −10.99 | 0.00 | 0.000 | 8.78  |
| Pou6f1         | −1.91 | 4.05  | −11.75 | 0.00 | 0.000 | 9.72  |
| Gna15          | −1.90 | 3.52  | −14.02 | 0.00 | 0.000 | 11.94 |
| Ap3b2          | −1.90 | 0.47  | −1.82  | 0.00 | 0.000 | 2.16  |
| Cyp4f13        | −1.90 | 4.38  | −15.15 | 0.00 | 0.000 | 12.89 |
| Spred3         | −1.90 | 3.80  | −1.14  | 0.00 | 0.000 | 6.67  |
| Ppm1f          | −1.89 | 5.14  | −17.23 | 0.00 | 0.000 | 14.51 |
| Tlr2           | −1.89 | 2.21  | −1.83  | 0.00 | 0.000 | 6.45  |
| Creb3l2        | −1.89 | 6.76  | −19.46 | 0.00 | 0.000 | 16.03 |
| Tnfrsf12       | −1.89 | 1.33  | −1.17  | 0.00 | 0.000 | 4.18  |
| Napepld        | −1.89 | 3.09  | −12.13 | 0.00 | 0.000 | 10.18 |
| Zbtb20         | −1.89 | 6.14  | −1.96  | 0.00 | 0.000 | 7.39  |
| Msh5           | −1.89 | 1.22  | −1.03  | 0.00 | 0.000 | 2.39  |
| Gm16196        | −1.89 | 2.84  | −1.81  | 0.00 | 0.000 | 1.83  |
| Gm37123        | −1.89 | 0.83  | −1.15  | 0.00 | 0.002 | −0.78 |
| Vill           | −1.88 | 5.03  | −15.22 | 0.00 | 0.000 | 12.89 |
| Polr3gl        | −1.88 | 4.95  | −13.64 | 0.00 | 0.000 | 11.49 |
| mt-Nd3         | −1.88 | 3.64  | −1.59  | 0.00 | 0.001 | −0.50 |
| Plcg1          | −1.88 | 5.56  | −17.74 | 0.00 | 0.000 | 14.87 |
| Rab6b          | −1.88 | 3.90  | −14.12 | 0.00 | 0.000 | 12.02 |
| Angptl6        | −1.87 | 5.09  | −12.11 | 0.00 | 0.000 | 9.99  |
| CAAA01141682.1 | −1.87 | 0.69  | −1.64  | 0.00 | 0.001 | 0.09  |
| Rps12-ps24     | −1.87 | 0.96  | −1.88  | 0.00 | 0.001 | 0.48  |
| Epha8          | −1.87 | 3.30  | −13.00 | 0.00 | 0.000 | 11.01 |

|               |       |       |        |      |       |       |
|---------------|-------|-------|--------|------|-------|-------|
| Gypc          | −1.86 | 4.07  | −13.17 | 0.00 | 0.000 | 11.14 |
| Cpeb3         | −1.86 | 2.06  | −1.43  | 0.00 | 0.000 | 5.91  |
| Gm26664       | −1.86 | −1.05 | −1.16  | 0.00 | 0.002 | −0.70 |
| Ankrd13d      | −1.86 | 1.07  | −1.30  | 0.00 | 0.000 | 2.83  |
| Gstt2         | −1.85 | 1.17  | −1.74  | 0.00 | 0.000 | 1.95  |
| 2010001A14Rik | −1.85 | 1.44  | −1.46  | 0.00 | 0.000 | 3.08  |
| Cyp2j6        | −1.85 | 3.42  | −11.46 | 0.00 | 0.000 | 9.46  |
| Ypel3         | −1.85 | 5.45  | −14.71 | 0.00 | 0.000 | 12.43 |
| 9530077C05Rik | −1.85 | 0.96  | −1.57  | 0.00 | 0.000 | 4.77  |
| Mx1           | −1.85 | −1.16 | −1.01  | 0.00 | 0.001 | 0.77  |
| Tnfaip3       | −1.84 | 2.98  | −1.17  | 0.00 | 0.000 | 4.03  |
| C030015A19Rik | −1.84 | 1.61  | −1.38  | 0.00 | 0.000 | 1.30  |
| Tmem241       | −1.84 | 1.78  | −1.89  | 0.00 | 0.000 | 3.73  |
| Kyat3         | −1.84 | 3.09  | −10.44 | 0.00 | 0.000 | 8.36  |
| Xlr4b         | −1.83 | 1.67  | −1.18  | 0.00 | 0.000 | 0.94  |
| Rpgrip1       | −1.83 | 0.68  | −1.16  | 0.00 | 0.000 | 2.65  |
| Ptpn          | −1.83 | 7.17  | −17.86 | 0.00 | 0.000 | 14.89 |
| Gm48653       | −1.83 | 0.07  | −1.87  | 0.00 | 0.004 | −1.25 |
| Gm47775       | −1.82 | 0.23  | −1.77  | 0.00 | 0.001 | 0.36  |
| Firre         | −1.82 | 3.83  | −1.48  | 0.00 | 0.000 | 1.04  |
| Acss2         | −1.82 | 3.64  | −13.68 | 0.00 | 0.000 | 11.63 |
| Irf5          | −1.82 | 0.97  | −1.41  | 0.00 | 0.000 | 3.06  |
| Vwa5a         | −1.82 | 4.44  | −12.03 | 0.00 | 0.000 | 9.93  |
| Lrp8os3       | −1.82 | −1.04 | −1.11  | 0.00 | 0.001 | 0.99  |
| Tle6          | −1.81 | 6.17  | −18.88 | 0.00 | 0.000 | 15.64 |
| Gm28438       | −1.81 | 3.51  | −1.17  | 0.00 | 0.002 | −1.26 |
| Mef2b         | −1.81 | 0.04  | −1.72  | 0.00 | 0.001 | 0.27  |
| Eps8l1        | −1.81 | 0.78  | −1.67  | 0.00 | 0.000 | 4.92  |
| Smim26        | −1.81 | 2.65  | −1.56  | 0.00 | 0.000 | 3.12  |
| Gipc3         | −1.81 | 5.10  | −14.87 | 0.00 | 0.000 | 12.60 |
| Ttc28         | −1.80 | 3.24  | −11.62 | 0.00 | 0.000 | 9.63  |
| Pkd1          | −1.80 | 5.98  | −12.35 | 0.00 | 0.000 | 10.13 |
| Tmem256       | −1.80 | 4.47  | −1.36  | 0.00 | 0.000 | 5.50  |
| Ldlrad4       | −1.80 | 1.25  | −1.74  | 0.00 | 0.000 | 3.56  |
| Iqcg          | −1.79 | 3.80  | −12.51 | 0.00 | 0.000 | 10.52 |
| Airn          | −1.79 | 1.37  | −1.63  | 0.00 | 0.000 | 1.73  |
| Plat          | −1.79 | 3.76  | −1.47  | 0.00 | 0.000 | 5.77  |
| Itga1         | −1.79 | 4.55  | −11.92 | 0.00 | 0.000 | 9.84  |
| mt-Atp8       | −1.79 | 3.09  | −1.77  | 0.00 | 0.005 | −1.99 |
| Gpnmmb        | −1.79 | 9.35  | −10.49 | 0.00 | 0.000 | 16.68 |
| Car11         | −1.79 | 3.53  | −10.34 | 0.00 | 0.000 | 8.18  |
| Aspg          | −1.78 | 4.30  | −12.81 | 0.00 | 0.000 | 10.76 |
| Prokr1        | −1.78 | 2.55  | −1.63  | 0.00 | 0.000 | 7.44  |
| mt-Nd4        | −1.78 | 9.41  | −1.84  | 0.00 | 0.004 | −2.58 |
| Clk1          | −1.78 | 5.91  | −1.19  | 0.00 | 0.000 | 5.07  |
| 2810403D21Rik | −1.78 | 2.09  | −1.74  | 0.00 | 0.000 | 3.47  |
| Aldh5a1       | −1.78 | 4.15  | −12.30 | 0.00 | 0.000 | 10.26 |
| Gm3764        | −1.78 | 0.89  | −1.71  | 0.00 | 0.000 | 1.96  |
| Fgfr3         | −1.78 | 0.15  | −1.36  | 0.00 | 0.002 | −0.35 |
| Gm44250       | −1.78 | 5.18  | −16.81 | 0.00 | 0.000 | 14.18 |
| Zfp85         | −1.78 | 2.24  | −1.06  | 0.00 | 0.000 | 6.73  |

|               |       |       |        |      |       |       |
|---------------|-------|-------|--------|------|-------|-------|
| Kctd21        | -1.77 | 2.47  | -1.73  | 0.00 | 0.000 | 6.29  |
| Egr3          | -1.77 | 1.47  | -1.75  | 0.00 | 0.000 | 3.52  |
| Adprh         | -1.77 | 5.79  | -17.60 | 0.00 | 0.000 | 14.75 |
| Inka1         | -1.77 | 2.17  | -1.38  | 0.00 | 0.000 | 5.83  |
| C1qtnf1       | -1.77 | 3.24  | -10.71 | 0.00 | 0.000 | 8.60  |
| Grik5         | -1.77 | 0.95  | -1.61  | 0.00 | 0.000 | 3.37  |
| Btn2a2        | -1.77 | 0.62  | -1.48  | 0.00 | 0.001 | -0.19 |
| Sh3kbp1       | -1.77 | 3.52  | -1.51  | 0.00 | 0.000 | 5.88  |
| D830044D21Rik | -1.77 | 0.46  | -1.64  | 0.00 | 0.006 | -1.70 |
| Nrbp2         | -1.77 | 3.55  | -10.09 | 0.00 | 0.000 | 7.87  |
| Ephx1         | -1.77 | 6.44  | -11.56 | 0.00 | 0.000 | 17.38 |
| Gm45833       | -1.77 | 0.81  | -1.37  | 0.00 | 0.002 | -0.38 |
| Hfe           | -1.77 | 3.73  | -1.97  | 0.00 | 0.000 | 7.73  |
| Npc1          | -1.76 | 5.82  | -16.23 | 0.00 | 0.000 | 13.70 |
| Crb2          | -1.76 | 2.81  | -1.49  | 0.00 | 0.000 | 7.23  |
| Kazald1       | -1.76 | 3.58  | -1.61  | 0.00 | 0.000 | 7.25  |
| Zfp712        | -1.75 | 1.20  | -1.82  | 0.00 | 0.001 | 0.34  |
| Pcbp3         | -1.75 | 1.38  | -1.28  | 0.00 | 0.000 | 2.78  |
| Car7          | -1.75 | -1.12 | -1.65  | 0.00 | 0.006 | -1.63 |
| Mterf2        | -1.75 | 2.58  | -1.01  | 0.00 | 0.000 | 6.63  |
| 1700003F12Rik | -1.75 | 1.90  | -1.43  | 0.00 | 0.000 | 2.99  |
| Slc2a8        | -1.74 | 4.49  | -10.25 | 0.00 | 0.000 | 7.94  |
| Gm34934       | -1.74 | 0.70  | -1.18  | 0.00 | 0.002 | -0.76 |
| Tap1          | -1.74 | 6.15  | -16.10 | 0.00 | 0.000 | 13.56 |
| Notch1        | -1.74 | 5.35  | -18.13 | 0.00 | 0.000 | 15.15 |
| Lrig1         | -1.74 | 5.84  | -16.96 | 0.00 | 0.000 | 14.25 |
| Mmp19         | -1.74 | 4.08  | -12.68 | 0.00 | 0.000 | 10.65 |
| Gm44067       | -1.73 | 2.99  | -1.07  | 0.00 | 0.003 | -1.39 |
| Junb          | -1.73 | 6.78  | -12.05 | 0.00 | 0.000 | 17.67 |
| Il4ra         | -1.73 | 2.92  | -10.88 | 0.00 | 0.000 | 8.85  |
| 9130002K18Rik | -1.73 | 0.01  | -1.71  | 0.02 | 0.028 | -3.36 |
| Zdhhc1        | -1.73 | 4.96  | -1.60  | 0.00 | 0.000 | 7.07  |
| Emc9          | -1.72 | 1.50  | -1.13  | 0.00 | 0.000 | 2.53  |
| Tmem8b        | -1.72 | 3.28  | -10.10 | 0.00 | 0.000 | 7.94  |
| Atg10         | -1.72 | 2.63  | -1.82  | 0.00 | 0.000 | 6.40  |
| Wdr45         | -1.72 | 2.06  | -1.76  | 0.00 | 0.000 | 4.99  |
| Abcd4         | -1.72 | 5.90  | -15.38 | 0.00 | 0.000 | 12.97 |
| Neat1         | -1.72 | 7.10  | -1.53  | 0.00 | 0.001 | -1.20 |
| Gm20756       | -1.72 | 1.85  | -1.37  | 0.00 | 0.002 | -0.62 |
| Oplah         | -1.72 | 4.48  | -15.40 | 0.00 | 0.000 | 13.08 |
| Lyst          | -1.71 | 5.72  | -10.28 | 0.00 | 0.000 | 7.83  |
| Mrpl24        | -1.71 | 5.18  | -14.29 | 0.00 | 0.000 | 12.08 |
| Cd248         | -1.71 | 2.38  | -1.53  | 0.00 | 0.000 | 4.58  |
| Cfl2          | -1.71 | 5.17  | -12.70 | 0.00 | 0.000 | 10.58 |
| Gm49201       | -1.71 | 0.78  | -1.56  | 0.00 | 0.000 | 1.66  |
| L3hypdh       | -1.71 | 4.33  | -11.17 | 0.00 | 0.000 | 9.04  |
| Eri3          | -1.70 | 5.27  | -15.81 | 0.00 | 0.000 | 13.38 |
| Cd22          | -1.70 | 0.20  | -1.09  | 0.00 | 0.001 | 0.91  |
| Doc2g         | -1.70 | 0.78  | -1.02  | 0.00 | 0.003 | -1.06 |
| Gm37893       | -1.70 | 0.42  | -1.93  | 0.01 | 0.020 | -3.02 |
| Mst1          | -1.70 | 5.90  | -11.81 | 0.00 | 0.000 | 9.55  |

|               |       |       |        |      |       |       |
|---------------|-------|-------|--------|------|-------|-------|
| Zfas1         | −1.70 | 6.68  | −1.99  | 0.00 | 0.000 | 4.66  |
| Dgka          | −1.70 | 4.99  | −15.39 | 0.00 | 0.000 | 13.05 |
| Ganc          | −1.69 | 1.57  | −1.34  | 0.00 | 0.000 | 4.43  |
| Smim15        | −1.69 | 4.63  | −12.64 | 0.00 | 0.000 | 10.57 |
| Map1a         | −1.69 | 2.81  | −1.01  | 0.00 | 0.000 | 6.61  |
| Dnase1l1      | −1.69 | 5.01  | −14.40 | 0.00 | 0.000 | 12.18 |
| Porcn         | −1.69 | 1.80  | −1.01  | 0.00 | 0.000 | 2.32  |
| Abtb1         | −1.69 | 4.68  | −15.73 | 0.00 | 0.000 | 13.35 |
| Nsmaf         | −1.69 | 4.24  | −14.24 | 0.00 | 0.000 | 12.12 |
| Dhrs3         | −1.68 | 1.47  | −1.32  | 0.00 | 0.000 | 1.15  |
| Axl           | −1.68 | 8.27  | −19.58 | 0.00 | 0.000 | 16.08 |
| Rps6ka5       | −1.68 | 2.45  | −1.12  | 0.00 | 0.000 | 5.46  |
| Ddt           | −1.68 | 1.52  | −1.65  | 0.00 | 0.000 | 3.37  |
| Crtap         | −1.67 | 5.46  | −14.69 | 0.00 | 0.000 | 12.42 |
| Arhgef37      | −1.67 | −1.16 | −1.21  | 0.00 | 0.002 | −0.63 |
| Spag6         | −1.67 | 2.40  | −1.77  | 0.00 | 0.000 | 3.44  |
| Mmp11         | −1.67 | 6.27  | −14.78 | 0.00 | 0.000 | 12.43 |
| Slc9a5        | −1.67 | 5.80  | −1.39  | 0.00 | 0.000 | 3.87  |
| Mindy2        | −1.67 | 4.06  | −1.93  | 0.00 | 0.000 | 7.59  |
| Zfp692        | −1.67 | 4.91  | −1.74  | 0.00 | 0.000 | 2.98  |
| Rps12-ps9     | −1.66 | 1.15  | −1.16  | 0.00 | 0.002 | −0.87 |
| Bbc3          | −1.66 | 5.35  | −10.54 | 0.00 | 0.000 | 8.16  |
| Ecm1          | −1.66 | 5.62  | −14.72 | 0.00 | 0.000 | 12.42 |
| Rab3a         | −1.66 | 1.01  | −1.94  | 0.00 | 0.000 | 2.28  |
| Klf4          | −1.66 | 5.92  | −16.67 | 0.00 | 0.000 | 14.02 |
| Gm46209       | −1.66 | 0.28  | −1.18  | 0.00 | 0.002 | −0.71 |
| Thbs3         | −1.66 | 3.78  | −1.29  | 0.00 | 0.000 | 5.54  |
| Rasip1        | −1.66 | 1.43  | −1.32  | 0.00 | 0.002 | −0.64 |
| Rpl22l1       | −1.66 | 4.61  | −1.32  | 0.00 | 0.000 | 2.33  |
| Bckdha        | −1.66 | 5.77  | −16.90 | 0.00 | 0.000 | 14.21 |
| Peak1         | −1.66 | 6.05  | −12.20 | 0.00 | 0.000 | 9.95  |
| Nfkbie        | −1.65 | 2.18  | −1.17  | 0.00 | 0.000 | 5.56  |
| Tor3a         | −1.65 | 5.03  | −15.75 | 0.00 | 0.000 | 13.34 |
| Kyat1         | −1.65 | 4.05  | −11.47 | 0.00 | 0.000 | 9.40  |
| Gm49284       | −1.65 | 1.24  | −1.54  | 0.00 | 0.001 | −0.20 |
| Tm7sf2        | −1.65 | 1.73  | −1.48  | 0.00 | 0.000 | 4.61  |
| Copz2         | −1.64 | 4.13  | −13.57 | 0.00 | 0.000 | 11.50 |
| Nat14         | −1.64 | 1.94  | −1.88  | 0.00 | 0.000 | 3.68  |
| AC160336.1    | −1.64 | 0.29  | −1.68  | 0.02 | 0.030 | −3.47 |
| Prune2        | −1.64 | 5.84  | −1.33  | 0.00 | 0.000 | 6.60  |
| Gm4961        | −1.63 | 1.09  | −1.78  | 0.00 | 0.000 | 3.60  |
| D430040D24Rik | −1.63 | 0.49  | −1.19  | 0.00 | 0.000 | 0.99  |
| Rpl17-ps3     | −1.63 | 2.18  | −1.92  | 0.00 | 0.000 | 2.10  |
| Atp2c2        | −1.63 | 1.56  | −1.61  | 0.00 | 0.000 | 1.63  |
| Per3          | −1.63 | 4.23  | −10.86 | 0.00 | 0.000 | 8.68  |
| Sh3bp1        | −1.63 | 4.40  | −1.52  | 0.00 | 0.000 | 5.70  |
| Col6a1        | −1.63 | 8.46  | −11.40 | 0.00 | 0.000 | 17.26 |
| Dbp           | −1.63 | 6.30  | −11.76 | 0.00 | 0.000 | 9.45  |
| Osbp2         | −1.63 | 3.67  | −10.92 | 0.00 | 0.000 | 8.84  |
| Lgals3bp      | −1.63 | 5.69  | −15.14 | 0.00 | 0.000 | 12.77 |
| Dand5         | −1.63 | 1.45  | −1.02  | 0.00 | 0.000 | 3.95  |

|               |       |       |        |      |       |       |
|---------------|-------|-------|--------|------|-------|-------|
| Lama5         | −1.62 | 8.19  | −11.80 | 0.00 | 0.000 | 9.43  |
| Smim11        | −1.62 | 3.70  | −1.29  | 0.00 | 0.000 | 6.85  |
| Abca8b        | −1.62 | 2.50  | −1.30  | 0.00 | 0.000 | 4.27  |
| Calcoco1      | −1.62 | 6.18  | −19.27 | 0.00 | 0.000 | 15.91 |
| Rgs9bp        | −1.62 | 0.25  | −1.64  | 0.00 | 0.001 | 0.13  |
| H2-T22        | −1.62 | 5.22  | −15.36 | 0.00 | 0.000 | 13.00 |
| Fam8a1        | −1.62 | 5.77  | −15.95 | 0.00 | 0.000 | 13.46 |
| Pdcd4         | −1.61 | 6.26  | −17.66 | 0.00 | 0.000 | 14.76 |
| Cst3          | −1.61 | 6.82  | −14.83 | 0.00 | 0.000 | 12.43 |
| Plppr2        | −1.61 | 4.87  | −13.97 | 0.00 | 0.000 | 11.82 |
| Sardh         | −1.61 | 4.89  | −14.40 | 0.00 | 0.000 | 12.19 |
| Tph1          | −1.61 | 0.80  | −1.43  | 0.00 | 0.002 | −0.34 |
| Itpka         | −1.61 | 1.28  | −1.25  | 0.00 | 0.000 | 4.27  |
| Olfm12b       | −1.61 | 1.02  | −1.98  | 0.00 | 0.000 | 2.33  |
| E230013L22Rik | −1.60 | −1.22 | −1.82  | 0.00 | 0.004 | −1.38 |
| Abca7         | −1.60 | 5.32  | −1.07  | 0.00 | 0.000 | 6.33  |
| Etfbkmt       | −1.60 | 3.94  | −10.61 | 0.00 | 0.000 | 8.45  |
| Tmem198b      | −1.60 | 4.60  | −12.61 | 0.00 | 0.000 | 10.53 |
| Zfp455        | −1.60 | 0.48  | −1.31  | 0.00 | 0.002 | −0.51 |
| Snx29         | −1.60 | 1.01  | −1.23  | 0.00 | 0.002 | −0.75 |
| Gm28229       | −1.60 | 1.14  | −1.37  | 0.00 | 0.002 | −0.46 |
| Tcea2         | −1.60 | 2.55  | −1.54  | 0.00 | 0.000 | 3.08  |
| Ccdc62        | −1.60 | 0.07  | −1.36  | 0.00 | 0.002 | −0.37 |
| Siae          | −1.60 | 4.08  | −13.15 | 0.00 | 0.000 | 11.11 |
| Pde4b         | −1.59 | 2.74  | −1.40  | 0.00 | 0.000 | 5.81  |
| Pcdhgc5       | −1.59 | 3.91  | −1.19  | 0.00 | 0.000 | 3.81  |
| Tnni3         | −1.59 | 0.39  | −1.00  | 0.00 | 0.003 | −1.07 |
| Defb25        | −1.59 | 0.68  | −1.88  | 0.00 | 0.004 | −1.34 |
| Tmem231       | −1.59 | 3.70  | −10.14 | 0.00 | 0.000 | 7.91  |
| Grina         | −1.58 | 8.49  | −17.28 | 0.00 | 0.000 | 14.42 |
| Tmem185a      | −1.58 | 6.06  | −17.53 | 0.00 | 0.000 | 14.68 |
| Gm26947       | −1.58 | 3.09  | −1.37  | 0.00 | 0.000 | 1.00  |
| Pet100        | −1.58 | 2.82  | −1.61  | 0.00 | 0.000 | 4.66  |
| Gm12940       | −1.58 | 1.73  | −1.24  | 0.00 | 0.002 | −0.83 |
| Camsap3       | −1.58 | −1.11 | −1.73  | 0.00 | 0.005 | −1.58 |
| Nicn1         | −1.58 | 3.82  | −13.20 | 0.00 | 0.000 | 11.17 |
| Pisd-ps1      | −1.58 | 1.98  | −1.46  | 0.00 | 0.000 | 3.02  |
| St3gal2       | −1.58 | 6.24  | −16.85 | 0.00 | 0.000 | 14.14 |
| Megf9         | −1.58 | 2.91  | −1.36  | 0.00 | 0.000 | 4.28  |
| Snhg20        | −1.57 | 2.69  | −1.16  | 0.00 | 0.002 | −1.14 |
| Fbxo31        | −1.57 | 6.54  | −14.21 | 0.00 | 0.000 | 11.89 |
| Gm4342        | −1.57 | −1.06 | −1.59  | 0.00 | 0.001 | 0.04  |
| Abcb10        | −1.57 | 5.76  | −16.21 | 0.00 | 0.000 | 13.66 |
| Ust           | −1.57 | 4.76  | −13.52 | 0.00 | 0.000 | 11.40 |
| Ache          | −1.57 | 0.78  | −1.62  | 0.00 | 0.001 | −0.01 |
| Lgals8        | −1.56 | 5.89  | −15.44 | 0.00 | 0.000 | 13.02 |
| Irgm1         | −1.56 | 3.88  | −12.69 | 0.00 | 0.000 | 10.67 |
| Akr1b8        | −1.56 | 6.01  | −13.43 | 0.00 | 0.000 | 11.20 |
| A530017D24Rik | −1.56 | 3.03  | −1.79  | 0.00 | 0.000 | 6.29  |
| Tmem50a       | −1.56 | 6.19  | −16.55 | 0.00 | 0.000 | 13.92 |
| Cox17         | −1.56 | 0.23  | −1.38  | 0.03 | 0.050 | −3.96 |

|               |       |       |        |      |       |       |
|---------------|-------|-------|--------|------|-------|-------|
| Trim7         | -1.56 | 2.82  | -1.66  | 0.00 | 0.000 | 4.71  |
| Aox1          | -1.56 | 3.36  | -1.18  | 0.00 | 0.000 | 2.28  |
| 4931406C07Rik | -1.56 | 4.86  | -14.65 | 0.00 | 0.000 | 12.41 |
| Adamtsl3      | -1.55 | 3.45  | -1.94  | 0.00 | 0.000 | 5.08  |
| Abhd4         | -1.55 | 5.93  | -14.91 | 0.00 | 0.000 | 12.56 |
| Rpl17-ps8     | -1.55 | 0.47  | -1.53  | 0.00 | 0.001 | -0.11 |
| Fstl1         | -1.55 | 7.38  | -18.47 | 0.00 | 0.000 | 15.31 |
| Idh1          | -1.55 | 5.52  | -14.68 | 0.00 | 0.000 | 12.39 |
| Gm13375       | -1.55 | 1.81  | -1.38  | 0.00 | 0.000 | 4.46  |
| 9330188P03Rik | -1.54 | 3.97  | -1.40  | 0.00 | 0.000 | 4.16  |
| Mrgpre        | -1.54 | 2.77  | -1.19  | 0.00 | 0.000 | 5.51  |
| Abhd1         | -1.54 | 1.39  | -1.54  | 0.00 | 0.001 | -0.23 |
| Rap1gap       | -1.54 | 5.10  | -13.76 | 0.00 | 0.000 | 11.59 |
| H2-D1         | -1.54 | 10.03 | -18.29 | 0.00 | 0.000 | 15.17 |
| Dpy19l1       | -1.54 | 5.12  | -12.17 | 0.00 | 0.000 | 10.02 |
| Klhl36        | -1.54 | 2.74  | -1.87  | 0.00 | 0.000 | 5.05  |
| mt-Nd1        | -1.54 | 9.90  | -1.54  | 0.00 | 0.007 | -3.16 |
| Lrrc15        | -1.54 | 3.66  | -13.70 | 0.00 | 0.000 | 11.61 |
| Gm12454       | -1.54 | 0.56  | -1.75  | 0.00 | 0.001 | 0.31  |
| Pex6          | -1.54 | 6.11  | -14.70 | 0.00 | 0.000 | 12.36 |
| A430103D13Rik | -1.53 | 1.45  | -1.26  | 0.00 | 0.002 | -0.77 |
| CT010445.1    | -1.53 | 1.49  | -1.48  | 0.00 | 0.008 | -2.21 |
| Pcdhgb2       | -1.53 | 2.44  | -1.06  | 0.00 | 0.000 | 2.25  |
| Fam76a        | -1.53 | 5.09  | -14.23 | 0.00 | 0.000 | 12.03 |
| Gpsm3         | -1.53 | 1.50  | -1.00  | 0.00 | 0.000 | 2.29  |
| Zfp874b       | -1.52 | 3.52  | -11.18 | 0.00 | 0.000 | 9.13  |
| Ccdc181       | -1.52 | 5.68  | -11.61 | 0.00 | 0.000 | 9.35  |
| Adgre5        | -1.52 | 5.25  | -13.33 | 0.00 | 0.000 | 11.15 |
| Qk            | -1.52 | 6.58  | -11.08 | 0.00 | 0.000 | 8.68  |
| Relb          | -1.52 | 4.90  | -1.50  | 0.00 | 0.000 | 6.94  |
| Ago3          | -1.52 | 4.30  | -1.78  | 0.00 | 0.000 | 3.12  |
| Pnpla7        | -1.52 | 4.47  | -13.39 | 0.00 | 0.000 | 11.30 |
| Irf8          | -1.52 | 5.08  | -13.83 | 0.00 | 0.000 | 11.67 |
| Nradd         | -1.52 | 1.81  | -1.21  | 0.00 | 0.000 | 4.18  |
| Prob1         | -1.52 | 3.18  | -1.13  | 0.00 | 0.000 | 5.36  |
| Fbln2         | -1.51 | 8.40  | -18.98 | 0.00 | 0.000 | 15.66 |
| Akt3          | -1.51 | 6.63  | -12.72 | 0.00 | 0.000 | 10.45 |
| Sdccag8       | -1.51 | 3.71  | -10.14 | 0.00 | 0.000 | 7.89  |
| Apc2          | -1.51 | 3.60  | -11.91 | 0.00 | 0.000 | 9.86  |
| BC048644      | -1.51 | 1.17  | -1.11  | 0.00 | 0.000 | 2.55  |
| Gm49405       | -1.51 | 0.51  | -1.92  | 0.01 | 0.020 | -3.10 |
| Pqlc3         | -1.51 | 5.15  | -13.36 | 0.00 | 0.000 | 11.20 |
| Zc3h6         | -1.51 | 3.62  | -1.12  | 0.00 | 0.001 | 0.41  |
| Pdgfra        | -1.50 | 6.93  | -13.38 | 0.00 | 0.000 | 11.09 |
| Tmc4          | -1.50 | 2.77  | -1.48  | 0.00 | 0.000 | 2.92  |
| Khk           | -1.50 | 4.60  | -12.09 | 0.00 | 0.000 | 9.96  |
| Raet1e        | -1.50 | 4.67  | -12.74 | 0.00 | 0.000 | 10.64 |
| Cd82          | -1.50 | 5.68  | -12.57 | 0.00 | 0.000 | 10.37 |
| mt-Nd5        | -1.50 | 9.45  | -1.04  | 0.01 | 0.016 | -4.15 |
| Elk3          | -1.49 | 6.50  | -16.72 | 0.00 | 0.000 | 14.03 |
| Tmco6         | -1.49 | 3.04  | -1.32  | 0.00 | 0.000 | 6.99  |



|               |       |       |        |      |       |       |
|---------------|-------|-------|--------|------|-------|-------|
| Btc           | -1.49 | 2.23  | -1.35  | 0.00 | 0.000 | 2.81  |
| 1600020E01Rik | -1.49 | 2.09  | -1.95  | 0.00 | 0.001 | 0.39  |
| Tnfaip8       | -1.49 | 5.21  | -14.96 | 0.00 | 0.000 | 12.65 |
| Anpep         | -1.49 | 7.78  | -16.65 | 0.00 | 0.000 | 13.93 |
| Ccdc82        | -1.49 | 4.15  | -11.25 | 0.00 | 0.000 | 9.13  |
| Sez6l2        | -1.49 | 4.84  | -14.65 | 0.00 | 0.000 | 12.41 |
| Tnfrsf9       | -1.49 | 4.65  | -13.46 | 0.00 | 0.000 | 11.34 |
| Speg          | -1.49 | 4.31  | -11.21 | 0.00 | 0.000 | 9.06  |
| Itm2c         | -1.49 | 6.84  | -16.78 | 0.00 | 0.000 | 14.06 |
| Rgs11         | -1.49 | 3.18  | -1.32  | 0.00 | 0.002 | -1.04 |
| Tm6sf1        | -1.49 | 2.29  | -1.36  | 0.00 | 0.000 | 4.37  |
| Acot13        | -1.48 | 5.40  | -11.70 | 0.00 | 0.000 | 9.47  |
| Spata2l       | -1.48 | 1.36  | -1.61  | 0.00 | 0.000 | 1.65  |
| Nlgn2         | -1.48 | 4.78  | -13.42 | 0.00 | 0.000 | 11.28 |
| Ak5           | -1.48 | 0.02  | -1.98  | 0.00 | 0.003 | -1.03 |
| Gnb5          | -1.48 | 4.79  | -13.39 | 0.00 | 0.000 | 11.25 |
| Gdi1          | -1.48 | 7.60  | -12.72 | 0.00 | 0.000 | 10.41 |
| Lrrn4cl       | -1.48 | 2.40  | -1.42  | 0.00 | 0.000 | 4.41  |
| Npc2          | -1.48 | 8.05  | -16.01 | 0.00 | 0.000 | 13.41 |
| Prkra         | -1.48 | 4.51  | -11.24 | 0.00 | 0.000 | 9.07  |
| Ttc41         | -1.48 | 0.11  | -1.00  | 0.00 | 0.003 | -1.03 |
| 4833407H14Rik | -1.48 | 1.54  | -1.99  | 0.00 | 0.000 | 2.30  |
| Frs3          | -1.48 | 2.33  | -1.00  | 0.00 | 0.000 | 3.81  |
| Zswim4        | -1.47 | 6.04  | -13.94 | 0.00 | 0.000 | 11.68 |
| Adamts20      | -1.47 | 2.77  | -1.32  | 0.00 | 0.000 | 2.71  |
| Heg1          | -1.47 | 5.01  | -13.61 | 0.00 | 0.000 | 11.45 |
| Tdpx-ps1      | -1.47 | 0.22  | -1.95  | 0.00 | 0.003 | -1.13 |
| Sptssa        | -1.47 | 4.35  | -1.79  | 0.00 | 0.000 | 7.40  |
| Espnl         | -1.47 | 0.07  | -1.81  | 0.00 | 0.001 | 0.42  |
| Arhgap45      | -1.47 | 6.17  | -14.81 | 0.00 | 0.000 | 12.45 |
| Caprin2       | -1.46 | 5.30  | -10.10 | 0.00 | 0.000 | 7.64  |
| Atpif1        | -1.46 | 7.18  | -13.89 | 0.00 | 0.000 | 11.57 |
| Igip          | -1.46 | 4.67  | -10.01 | 0.00 | 0.000 | 7.61  |
| Osbpl3        | -1.46 | 5.66  | -15.64 | 0.00 | 0.000 | 13.20 |
| Txndc12       | -1.46 | 6.45  | -14.35 | 0.00 | 0.000 | 12.02 |
| Mgst1         | -1.46 | 5.58  | -14.92 | 0.00 | 0.000 | 12.59 |
| Plp1          | -1.46 | 2.82  | -1.92  | 0.00 | 0.001 | 0.22  |
| Akr1b10       | -1.46 | 4.84  | -13.83 | 0.00 | 0.000 | 11.68 |
| Parp10        | -1.46 | 4.47  | -10.83 | 0.00 | 0.000 | 8.59  |
| Glt8d1        | -1.45 | 4.80  | -1.63  | 0.00 | 0.000 | 7.11  |
| Gm14403       | -1.45 | 0.74  | -1.24  | 0.00 | 0.002 | -0.69 |
| Ccpgl1os      | -1.45 | 1.06  | -1.18  | 0.00 | 0.000 | 0.96  |
| Spata1        | -1.45 | 1.41  | -1.41  | 0.00 | 0.000 | 1.32  |
| Cacna1c       | -1.45 | 3.79  | -1.33  | 0.00 | 0.000 | 5.52  |
| 4732471J01Rik | -1.45 | -1.10 | -1.93  | 0.00 | 0.004 | -1.12 |
| Tmem53        | -1.45 | 1.75  | -1.97  | 0.00 | 0.000 | 2.20  |
| Zscan2        | -1.45 | 2.10  | -1.26  | 0.00 | 0.000 | 0.96  |
| 5830444B04Rik | -1.45 | 1.93  | -1.19  | 0.00 | 0.000 | 4.13  |
| Tln1          | -1.45 | 7.97  | -16.06 | 0.00 | 0.000 | 13.45 |
| Slc38a9       | -1.45 | 3.63  | -1.70  | 0.00 | 0.000 | 3.12  |
| Lgmn          | -1.45 | 7.91  | -16.35 | 0.00 | 0.000 | 13.69 |

|               |       |      |        |      |       |       |
|---------------|-------|------|--------|------|-------|-------|
| Prpf40b       | −1.45 | 4.51 | −1.58  | 0.00 | 0.000 | 7.11  |
| Gm38560       | −1.45 | 0.23 | −1.89  | 0.00 | 0.004 | −1.23 |
| Rpl13a        | −1.45 | 5.27 | −10.32 | 0.00 | 0.000 | 7.92  |
| Naip6         | −1.45 | 0.25 | −1.94  | 0.00 | 0.003 | −1.15 |
| Oasl1         | −1.45 | 1.21 | −1.15  | 0.00 | 0.001 | 0.85  |
| Zfand6        | −1.45 | 5.37 | −11.11 | 0.00 | 0.000 | 8.83  |
| Adck5         | −1.44 | 4.52 | −10.45 | 0.00 | 0.000 | 8.15  |
| Lrtm2         | −1.44 | 0.09 | −1.52  | 0.00 | 0.007 | −1.96 |
| Ppp1r18       | −1.44 | 6.90 | −16.25 | 0.00 | 0.000 | 13.64 |
| Mrap          | −1.44 | 3.76 | −11.24 | 0.00 | 0.000 | 9.15  |
| Itpr2         | −1.44 | 5.77 | −14.37 | 0.00 | 0.000 | 12.09 |
| Acp5          | −1.44 | 3.58 | −10.02 | 0.00 | 0.000 | 7.75  |
| Nid1          | −1.44 | 7.52 | −11.52 | 0.00 | 0.000 | 9.14  |
| Ino80dos      | −1.44 | 0.12 | −1.80  | 0.00 | 0.004 | −1.45 |
| Bbs9          | −1.44 | 3.17 | −1.51  | 0.00 | 0.000 | 5.88  |
| Gm8692        | −1.44 | 0.40 | −1.56  | 0.00 | 0.001 | −0.04 |
| Cd37          | −1.44 | 4.25 | −11.36 | 0.00 | 0.000 | 9.23  |
| Sirt5         | −1.44 | 4.04 | −12.05 | 0.00 | 0.000 | 9.99  |
| Itm2b         | −1.44 | 8.18 | −17.35 | 0.00 | 0.000 | 14.48 |
| Rnf13         | −1.44 | 6.05 | −12.15 | 0.00 | 0.000 | 9.90  |
| 1700120C14Rik | −1.44 | 2.18 | −1.83  | 0.00 | 0.004 | −1.69 |
| Sdcbp2        | −1.44 | 0.09 | −1.01  | 0.00 | 0.003 | −1.03 |
| Asah2         | −1.44 | 4.30 | −1.50  | 0.00 | 0.000 | 7.02  |
| 2310069B03Rik | −1.44 | 0.71 | −1.06  | 0.00 | 0.001 | 0.81  |
| Arhgef25      | −1.43 | 5.95 | −10.54 | 0.00 | 0.000 | 8.09  |
| Gdap11l       | −1.43 | 2.76 | −1.22  | 0.00 | 0.000 | 2.52  |
| Syt2          | −1.43 | 1.85 | −1.39  | 0.00 | 0.000 | 2.91  |
| Selenom       | −1.43 | 5.61 | −12.23 | 0.00 | 0.000 | 10.02 |
| Ap3m2         | −1.43 | 3.43 | −1.19  | 0.00 | 0.000 | 6.75  |
| Il17rc        | −1.43 | 5.51 | −13.19 | 0.00 | 0.000 | 11.00 |
| Bdh2          | −1.43 | 1.70 | −1.26  | 0.00 | 0.002 | −0.83 |
| Elmo3         | −1.43 | 0.31 | −1.80  | 0.01 | 0.024 | −3.27 |
| Hspb2         | −1.42 | 1.82 | −1.88  | 0.00 | 0.000 | 3.70  |
| Slc25a37      | −1.42 | 6.98 | −1.96  | 0.00 | 0.000 | 7.32  |
| Nfia          | −1.42 | 5.81 | −14.87 | 0.00 | 0.000 | 12.53 |
| Ikbip         | −1.42 | 5.86 | −11.70 | 0.00 | 0.000 | 9.42  |
| Wipi1         | −1.42 | 5.33 | −12.29 | 0.00 | 0.000 | 10.11 |
| Guca1a        | −1.42 | 3.60 | −1.29  | 0.00 | 0.000 | 2.43  |
| Rps19-ps3     | −1.41 | 1.46 | −1.68  | 0.00 | 0.000 | 1.79  |
| Dbnidd2       | −1.41 | 1.07 | −1.31  | 0.00 | 0.002 | −0.59 |
| Clmp          | −1.41 | 4.01 | −1.64  | 0.00 | 0.000 | 7.23  |
| Insl6         | −1.41 | 2.97 | −1.64  | 0.00 | 0.000 | 3.13  |
| Gm17494       | −1.41 | 0.96 | −1.66  | 0.00 | 0.006 | −1.82 |
| Dnase2a       | −1.41 | 6.15 | −16.44 | 0.00 | 0.000 | 13.82 |
| Fermt2        | −1.40 | 6.34 | −12.48 | 0.00 | 0.000 | 10.21 |
| Akap6         | −1.40 | 3.49 | −1.03  | 0.00 | 0.000 | 2.03  |
| Gm7363        | −1.40 | 0.35 | −1.05  | 0.00 | 0.003 | −0.97 |
| Abhd14a       | −1.40 | 4.93 | −13.32 | 0.00 | 0.000 | 11.18 |
| 9530018F02Rik | −1.40 | 0.00 | −1.19  | 0.00 | 0.002 | −0.68 |
| Slc25a29      | −1.40 | 3.05 | −1.26  | 0.00 | 0.000 | 5.55  |
| Naa80         | −1.40 | 4.15 | −1.85  | 0.00 | 0.000 | 4.79  |

|               |       |      |        |      |       |       |
|---------------|-------|------|--------|------|-------|-------|
| Rpl17         | −1.40 | 9.71 | −1.29  | 0.00 | 0.000 | 3.55  |
| Asap1         | −1.40 | 6.82 | −14.20 | 0.00 | 0.000 | 11.87 |
| Cd40          | −1.40 | 4.11 | −1.20  | 0.00 | 0.000 | 6.70  |
| Sept2         | −1.40 | 0.53 | −1.03  | 0.01 | 0.016 | −2.90 |
| Ttc23         | −1.40 | 3.97 | −11.56 | 0.00 | 0.000 | 9.50  |
| Amt           | −1.40 | 0.27 | −1.00  | 0.00 | 0.003 | −1.05 |
| Acsf2         | −1.40 | 5.65 | −13.17 | 0.00 | 0.000 | 10.96 |
| Map1lc3b      | −1.39 | 6.58 | −17.01 | 0.00 | 0.000 | 14.24 |
| Gm40723       | −1.39 | 0.12 | −1.51  | 0.00 | 0.007 | −1.91 |
| Npr2          | −1.39 | 5.09 | −10.87 | 0.00 | 0.000 | 8.58  |
| C2cd2l        | −1.39 | 5.09 | −14.09 | 0.00 | 0.000 | 11.90 |
| Trp53inp1     | −1.39 | 3.67 | −1.92  | 0.00 | 0.000 | 4.97  |
| E130311K13Rik | −1.39 | 3.86 | −10.57 | 0.00 | 0.000 | 8.40  |
| Cfp           | −1.39 | 0.80 | −1.40  | 0.00 | 0.009 | −2.25 |
| Zfp398        | −1.39 | 4.85 | −1.82  | 0.00 | 0.000 | 4.61  |
| Ifit2         | −1.39 | 3.70 | −1.45  | 0.00 | 0.000 | 5.73  |
| Trpt1         | −1.39 | 2.31 | −1.23  | 0.00 | 0.000 | 4.15  |
| Akr1e1        | −1.39 | 5.27 | −14.27 | 0.00 | 0.000 | 12.04 |
| Sp140         | −1.39 | 2.54 | −1.97  | 0.00 | 0.000 | 5.21  |
| Dguok         | −1.38 | 3.87 | −1.19  | 0.00 | 0.000 | 5.34  |
| Nbr1          | −1.38 | 5.31 | −12.35 | 0.00 | 0.000 | 10.18 |
| F2r           | −1.38 | 6.61 | −12.73 | 0.00 | 0.000 | 10.46 |
| Cyba          | −1.38 | 6.10 | −10.16 | 0.00 | 0.000 | 7.61  |
| Slc35d2       | −1.38 | 2.28 | −1.26  | 0.00 | 0.000 | 4.19  |
| Zrsr1         | −1.38 | 4.73 | −12.62 | 0.00 | 0.000 | 10.50 |
| Samd14        | −1.38 | 1.84 | −1.11  | 0.00 | 0.000 | 2.47  |
| Gm5075        | −1.38 | 1.74 | −1.66  | 0.00 | 0.000 | 1.72  |
| Gm8624        | −1.37 | 0.35 | −1.07  | 0.00 | 0.003 | −0.93 |
| Gm11613       | −1.37 | 0.41 | −1.93  | 0.00 | 0.001 | 0.57  |
| Dram2         | −1.37 | 4.53 | −10.82 | 0.00 | 0.000 | 8.58  |
| Pak1          | −1.37 | 6.45 | −16.26 | 0.00 | 0.000 | 13.65 |
| Rundc3a       | −1.37 | 6.39 | −14.44 | 0.00 | 0.000 | 12.11 |
| Smpd2         | −1.37 | 4.43 | −10.71 | 0.00 | 0.000 | 8.48  |
| Zfpm1         | −1.37 | 6.02 | −11.16 | 0.00 | 0.000 | 8.82  |
| Pim1          | −1.37 | 5.48 | −10.67 | 0.00 | 0.000 | 8.30  |
| Prickle3      | −1.37 | 3.52 | −1.11  | 0.00 | 0.000 | 5.26  |
| Col6a3        | −1.36 | 3.22 | −1.62  | 0.00 | 0.000 | 4.61  |
| Col5a3        | −1.36 | 7.42 | −14.83 | 0.00 | 0.000 | 12.41 |
| Gm19705       | −1.36 | 0.35 | −1.74  | 0.00 | 0.005 | −1.58 |
| Rpl17-ps5     | −1.36 | 4.52 | −1.80  | 0.00 | 0.000 | 3.10  |
| Arhgap22      | −1.36 | 6.44 | −14.01 | 0.00 | 0.000 | 11.72 |
| Trpm4         | −1.36 | 3.16 | −1.93  | 0.00 | 0.000 | 3.52  |
| Lrrc45        | −1.36 | 4.95 | −10.08 | 0.00 | 0.000 | 7.65  |
| Ube2h         | −1.36 | 7.03 | −17.44 | 0.00 | 0.000 | 14.56 |
| Csrp2         | −1.36 | 3.97 | −1.13  | 0.00 | 0.000 | 5.23  |
| Fbxl20        | −1.36 | 4.96 | −13.42 | 0.00 | 0.000 | 11.27 |
| Polk          | −1.36 | 4.58 | −1.40  | 0.00 | 0.000 | 6.86  |
| Foxs1         | −1.36 | 5.66 | −12.84 | 0.00 | 0.000 | 10.62 |
| Tpra1         | −1.36 | 5.49 | −12.40 | 0.00 | 0.000 | 10.21 |
| Ccng2         | −1.36 | 3.17 | −1.06  | 0.00 | 0.001 | 0.34  |
| Loxl2         | −1.36 | 4.84 | −12.04 | 0.00 | 0.000 | 9.89  |

|               |       |       |        |      |       |       |
|---------------|-------|-------|--------|------|-------|-------|
| Map3k13       | -1.35 | 1.60  | -1.99  | 0.00 | 0.001 | 0.57  |
| Hpse          | -1.35 | 0.18  | -1.15  | 0.01 | 0.013 | -2.63 |
| Smpdl3b       | -1.35 | 5.03  | -14.34 | 0.00 | 0.000 | 12.10 |
| Ccnl2         | -1.35 | 6.13  | -1.26  | 0.00 | 0.000 | 5.11  |
| Rexo5         | -1.35 | 3.33  | -1.88  | 0.00 | 0.000 | 1.84  |
| Tspan17       | -1.35 | 5.00  | -10.75 | 0.00 | 0.000 | 8.44  |
| Hivep3        | -1.35 | 4.29  | -1.31  | 0.00 | 0.000 | 6.79  |
| E430024I08Rik | -1.35 | 1.76  | -1.92  | 0.00 | 0.004 | -1.48 |
| Tifa          | -1.35 | 2.73  | -1.88  | 0.00 | 0.000 | 3.58  |
| Slc25a30      | -1.35 | 6.13  | -12.41 | 0.00 | 0.000 | 10.17 |
| Tatdn3        | -1.34 | 2.53  | -1.71  | 0.00 | 0.000 | 4.86  |
| Lima1         | -1.34 | 6.85  | -15.92 | 0.00 | 0.000 | 13.37 |
| Socs3         | -1.34 | 4.67  | -12.71 | 0.00 | 0.000 | 10.60 |
| Rhox2h        | -1.34 | 5.03  | -1.67  | 0.00 | 0.000 | 7.14  |
| Creb3l1       | -1.34 | 1.00  | -1.26  | 0.00 | 0.000 | 1.12  |
| Mrpl33        | -1.34 | 4.57  | -1.96  | 0.00 | 0.000 | 3.37  |
| C730034F03Rik | -1.34 | -1.19 | -1.92  | 0.01 | 0.020 | -2.97 |
| Sil1          | -1.34 | 5.08  | -11.01 | 0.00 | 0.000 | 8.75  |
| Cryz          | -1.34 | 5.02  | -12.47 | 0.00 | 0.000 | 10.32 |
| Trerf1        | -1.33 | 2.13  | -1.25  | 0.00 | 0.000 | 4.19  |
| Sec16b        | -1.33 | 4.90  | -10.14 | 0.00 | 0.000 | 7.74  |
| Cyb5d2        | -1.33 | 2.52  | -1.36  | 0.00 | 0.000 | 2.73  |
| Stx11         | -1.33 | 4.35  | -1.70  | 0.00 | 0.000 | 7.27  |
| Abca2         | -1.33 | 7.01  | -13.09 | 0.00 | 0.000 | 10.79 |
| Gm16288       | -1.33 | 1.15  | -1.94  | 0.01 | 0.019 | -3.20 |
| Lats2         | -1.33 | 4.04  | -10.69 | 0.00 | 0.000 | 8.52  |
| Rps12         | -1.33 | 10.57 | -1.54  | 0.00 | 0.000 | 0.63  |
| Shld2         | -1.33 | 5.46  | -11.50 | 0.00 | 0.000 | 9.24  |
| Adhfe1        | -1.33 | 3.60  | -1.28  | 0.00 | 0.000 | 6.81  |
| Gm20544       | -1.32 | 0.84  | -1.85  | 0.00 | 0.004 | -1.50 |
| Gm37254       | -1.32 | 1.23  | -1.32  | 0.00 | 0.002 | -0.58 |
| Myo6          | -1.32 | 5.10  | -1.50  | 0.00 | 0.000 | 6.90  |
| Col16a1       | -1.32 | 7.71  | -14.74 | 0.00 | 0.000 | 12.33 |
| Hspb11        | -1.32 | 4.44  | -1.00  | 0.00 | 0.000 | 6.35  |
| Gm49774       | -1.32 | 2.65  | -1.64  | 0.00 | 0.000 | 3.24  |
| AC122818.3    | -1.32 | 2.14  | -1.32  | 0.00 | 0.000 | 1.07  |
| Mfsd4b4       | -1.32 | 3.15  | -1.79  | 0.00 | 0.000 | 4.87  |
| Dst           | -1.32 | 7.56  | -1.94  | 0.00 | 0.000 | 7.27  |
| Gzmm          | -1.32 | -1.07 | -1.13  | 0.01 | 0.014 | -2.63 |
| Slc25a20      | -1.32 | 2.74  | -1.70  | 0.00 | 0.000 | 3.24  |
| Gm14494       | -1.32 | 3.59  | -1.27  | 0.00 | 0.000 | 2.41  |
| Trp53inp2     | -1.32 | 4.15  | -1.70  | 0.00 | 0.000 | 7.29  |
| Rab24         | -1.31 | 6.04  | -13.44 | 0.00 | 0.000 | 11.19 |
| St3gal6       | -1.31 | 4.99  | -11.66 | 0.00 | 0.000 | 9.46  |
| Trim2         | -1.31 | 3.55  | -1.26  | 0.00 | 0.000 | 5.46  |
| C430049B03Rik | -1.31 | -1.06 | -1.83  | 0.00 | 0.004 | -1.35 |
| Nr1d1         | -1.31 | 6.79  | -1.99  | 0.00 | 0.000 | 7.37  |
| Pdlim5        | -1.31 | 5.43  | -1.10  | 0.00 | 0.000 | 6.35  |
| Dnajb4        | -1.31 | 5.95  | -11.32 | 0.00 | 0.000 | 8.99  |
| Zmat5         | -1.31 | 3.71  | -1.68  | 0.00 | 0.000 | 4.58  |
| Atg9b         | -1.31 | 3.77  | -1.31  | 0.00 | 0.000 | 0.65  |

|               |       |       |        |      |       |       |
|---------------|-------|-------|--------|------|-------|-------|
| Ptpn14        | -1.31 | 5.57  | -1.88  | 0.00 | 0.000 | 7.34  |
| Ucn2          | -1.31 | 0.20  | -1.42  | 0.03 | 0.047 | -3.96 |
| Vbp1          | -1.31 | 7.36  | -11.86 | 0.00 | 0.000 | 9.51  |
| Amotl2        | -1.31 | 5.67  | -13.40 | 0.00 | 0.000 | 11.18 |
| Nudt16        | -1.30 | 1.58  | -1.60  | 0.00 | 0.000 | 1.62  |
| Zbtb11os1     | -1.30 | 0.70  | -1.22  | 0.00 | 0.002 | -0.77 |
| Tgfb1         | -1.30 | 5.03  | -13.75 | 0.00 | 0.000 | 11.55 |
| Lrig3         | -1.30 | 5.16  | -12.98 | 0.00 | 0.000 | 10.83 |
| Xdh           | -1.30 | 7.38  | -15.85 | 0.00 | 0.000 | 13.29 |
| Bcas3         | -1.30 | 4.34  | -1.28  | 0.00 | 0.000 | 5.36  |
| S1pr2         | -1.30 | 4.68  | -11.35 | 0.00 | 0.000 | 9.16  |
| 4930481A15Rik | -1.30 | -1.12 | -1.50  | 0.00 | 0.007 | -1.99 |
| Ccdc122       | -1.30 | 1.81  | -1.47  | 0.00 | 0.001 | -0.47 |
| Acsf3         | -1.30 | 2.54  | -1.36  | 0.00 | 0.000 | 2.79  |
| Hid1          | -1.30 | 4.95  | -10.87 | 0.00 | 0.000 | 8.59  |
| Srgap3        | -1.30 | 6.63  | -12.34 | 0.00 | 0.000 | 10.04 |
| Gm4707        | -1.29 | -1.11 | -1.47  | 0.03 | 0.043 | -3.79 |
| Chst13        | -1.29 | 1.43  | -1.05  | 0.00 | 0.003 | -1.13 |
| Sh2d6         | -1.29 | 2.09  | -1.32  | 0.00 | 0.002 | -0.66 |
| Plod1         | -1.29 | 6.48  | -15.48 | 0.00 | 0.000 | 13.01 |
| Commd3        | -1.29 | 6.12  | -12.39 | 0.00 | 0.000 | 10.14 |
| Kank3         | -1.29 | 0.46  | -1.90  | 0.00 | 0.001 | 0.48  |
| Mppe1         | -1.29 | 3.42  | -1.97  | 0.00 | 0.000 | 6.44  |
| Zfp949        | -1.29 | 2.70  | -1.95  | 0.00 | 0.000 | 3.67  |
| Nqo2          | -1.29 | 5.10  | -13.44 | 0.00 | 0.000 | 11.29 |
| Gm10054       | -1.29 | 0.81  | -1.95  | 0.00 | 0.003 | -1.21 |
| Serinc1       | -1.29 | 7.31  | -11.42 | 0.00 | 0.000 | 9.03  |
| Pam           | -1.28 | 6.80  | -14.81 | 0.00 | 0.000 | 12.42 |
| Zfp658        | -1.28 | 0.94  | -1.26  | 0.00 | 0.002 | -0.69 |
| Spa17         | -1.28 | 0.13  | -1.24  | 0.01 | 0.012 | -2.46 |
| Ccdc171       | -1.28 | 1.63  | -1.99  | 0.00 | 0.001 | 0.52  |
| Rps12-ps3     | -1.28 | 2.47  | -1.15  | 0.00 | 0.002 | -1.15 |
| Rhox2g        | -1.28 | 4.52  | -11.82 | 0.00 | 0.000 | 9.70  |
| Lanc11        | -1.28 | 6.11  | -14.46 | 0.00 | 0.000 | 12.15 |
| Prr13         | -1.28 | 6.70  | -11.18 | 0.00 | 0.000 | 8.78  |
| 4921524J17Rik | -1.28 | 4.73  | -1.63  | 0.00 | 0.000 | 5.80  |
| Ggcx          | -1.28 | 3.97  | -1.83  | 0.00 | 0.000 | 6.21  |
| Rpl17-ps10    | -1.28 | 5.38  | -1.63  | 0.00 | 0.000 | 2.69  |
| Nlrc5         | -1.28 | 4.76  | -10.14 | 0.00 | 0.000 | 7.76  |
| Dirc2         | -1.28 | 4.60  | -10.78 | 0.00 | 0.000 | 8.52  |
| Cacng7        | -1.28 | 4.37  | -10.57 | 0.00 | 0.000 | 8.30  |
| Sertad3       | -1.28 | 3.66  | -10.07 | 0.00 | 0.000 | 7.82  |
| Pls3          | -1.28 | 6.75  | -13.31 | 0.00 | 0.000 | 11.03 |
| Slc39a10      | -1.27 | 3.98  | -1.58  | 0.00 | 0.000 | 4.47  |
| 6030445D17Rik | -1.27 | -1.01 | -1.20  | 0.01 | 0.012 | -2.51 |
| Gm45495       | -1.27 | 0.12  | -1.41  | 0.00 | 0.002 | -0.33 |
| Eng           | -1.27 | 7.33  | -11.34 | 0.00 | 0.000 | 8.92  |
| Cast          | -1.27 | 6.69  | -12.06 | 0.00 | 0.000 | 9.76  |
| Hibadh        | -1.27 | 6.84  | -15.89 | 0.00 | 0.000 | 13.34 |
| Trmu          | -1.27 | 3.15  | -1.55  | 0.00 | 0.000 | 2.96  |
| Fblim1        | -1.27 | 5.51  | -13.59 | 0.00 | 0.000 | 11.37 |

|               |       |      |        |      |       |       |
|---------------|-------|------|--------|------|-------|-------|
| Mvd           | -1.27 | 4.38 | -1.81  | 0.00 | 0.000 | 7.37  |
| Klra4         | -1.27 | 2.04 | -1.35  | 0.00 | 0.000 | 1.12  |
| Hes7          | -1.27 | 4.97 | -1.78  | 0.00 | 0.000 | 5.96  |
| Lurap1        | -1.27 | 2.92 | -1.19  | 0.00 | 0.000 | 3.98  |
| A530020G20Rik | -1.27 | 2.94 | -1.70  | 0.00 | 0.005 | -2.17 |
| Slc46a1       | -1.27 | 1.73 | -1.50  | 0.00 | 0.000 | 1.42  |
| Ago4          | -1.27 | 3.64 | -1.67  | 0.00 | 0.000 | 4.59  |
| Rsrp1         | -1.27 | 5.10 | -1.44  | 0.00 | 0.002 | -1.16 |
| Svbp          | -1.27 | 2.83 | -1.83  | 0.00 | 0.001 | 0.02  |
| Cyp4v3        | -1.27 | 1.55 | -1.14  | 0.00 | 0.001 | 0.81  |
| Hspg2         | -1.26 | 9.40 | -12.39 | 0.00 | 0.000 | 10.05 |
| Iqsec2        | -1.26 | 2.21 | -1.76  | 0.00 | 0.000 | 1.79  |
| Nfat5         | -1.26 | 7.06 | -1.39  | 0.00 | 0.000 | 2.13  |
| B330016D10Rik | -1.26 | 0.39 | -1.37  | 0.00 | 0.009 | -2.26 |
| Ropn1l        | -1.26 | 0.27 | -1.78  | 0.00 | 0.005 | -1.51 |
| AW549877      | -1.26 | 5.66 | -1.49  | 0.00 | 0.000 | 5.48  |
| Dpp7          | -1.26 | 4.89 | -1.73  | 0.00 | 0.000 | 4.48  |
| Gm30074       | -1.26 | 1.46 | -1.67  | 0.00 | 0.006 | -1.97 |
| Gm28439       | -1.26 | 5.05 | -1.69  | 0.02 | 0.030 | -4.50 |
| Adamts4       | -1.26 | 4.11 | -1.41  | 0.00 | 0.000 | 5.58  |
| Usp18         | -1.26 | 2.25 | -1.06  | 0.00 | 0.000 | 6.59  |
| Gstm2         | -1.26 | 5.65 | -12.80 | 0.00 | 0.000 | 10.59 |
| Mettl15       | -1.26 | 1.90 | -1.71  | 0.00 | 0.001 | 0.00  |
| Ifi35         | -1.26 | 4.38 | -1.71  | 0.00 | 0.000 | 5.93  |
| Gm12816       | -1.26 | 1.11 | -1.74  | 0.00 | 0.001 | 0.19  |
| Snx10         | -1.26 | 4.92 | -1.48  | 0.00 | 0.000 | 5.58  |
| Cep41         | -1.25 | 4.04 | -1.45  | 0.00 | 0.000 | 6.98  |
| Tmem145       | -1.25 | 0.82 | -1.53  | 0.00 | 0.007 | -2.02 |
| Tm2d1         | -1.25 | 3.73 | -1.12  | 0.00 | 0.000 | 3.78  |
| Gm13848       | -1.25 | 1.97 | -1.43  | 0.00 | 0.000 | 2.94  |
| B2m           | -1.25 | 9.62 | -13.53 | 0.00 | 0.000 | 11.20 |
| Pitpnm1       | -1.25 | 5.91 | -1.84  | 0.00 | 0.000 | 7.24  |
| Fuz           | -1.25 | 3.79 | -1.05  | 0.00 | 0.000 | 6.50  |
| Zfp580        | -1.25 | 3.17 | -1.42  | 0.00 | 0.000 | 4.32  |
| Thap3         | -1.25 | 5.07 | -11.35 | 0.00 | 0.000 | 9.11  |
| Myipf         | -1.25 | 0.46 | -1.84  | 0.00 | 0.004 | -1.41 |
| Cmc4          | -1.25 | 1.66 | -1.40  | 0.00 | 0.000 | 1.26  |
| Insig1        | -1.25 | 5.81 | -10.74 | 0.00 | 0.000 | 8.33  |
| Pltp          | -1.25 | 7.11 | -12.46 | 0.00 | 0.000 | 10.14 |
| Cfap58        | -1.25 | 0.55 | -1.24  | 0.01 | 0.011 | -2.49 |
| Stap2         | -1.24 | 1.50 | -1.34  | 0.00 | 0.000 | 1.16  |
| Cotl1         | -1.24 | 5.25 | -10.51 | 0.00 | 0.000 | 8.13  |
| Cfap57        | -1.24 | 0.46 | -1.76  | 0.00 | 0.001 | 0.25  |
| E230016M11Rik | -1.24 | 1.75 | -1.40  | 0.00 | 0.002 | -0.56 |
| Vps37d        | -1.24 | 1.27 | -1.97  | 0.00 | 0.001 | 0.51  |
| Mknk1         | -1.24 | 5.93 | -13.74 | 0.00 | 0.000 | 11.50 |
| Slc26a11      | -1.24 | 3.95 | -1.92  | 0.00 | 0.000 | 4.93  |
| Hap1          | -1.24 | 0.49 | -1.16  | 0.00 | 0.002 | -0.83 |
| Akap13        | -1.24 | 5.16 | -1.71  | 0.00 | 0.000 | 5.82  |
| Asap3         | -1.24 | 2.63 | -1.90  | 0.00 | 0.000 | 5.08  |
| Sat1          | -1.23 | 5.40 | -1.91  | 0.00 | 0.000 | 4.67  |

|               |       |      |        |      |       |       |
|---------------|-------|------|--------|------|-------|-------|
| Rad52         | -1.23 | 4.83 | -1.77  | 0.00 | 0.000 | 7.28  |
| Pfdn5         | -1.23 | 7.25 | -10.27 | 0.00 | 0.000 | 7.69  |
| Fam214b       | -1.23 | 4.34 | -10.69 | 0.00 | 0.000 | 8.48  |
| Col6a2        | -1.23 | 7.15 | -15.09 | 0.00 | 0.000 | 12.64 |
| Syne2         | -1.23 | 7.68 | -1.52  | 0.00 | 0.000 | 5.38  |
| Slc37a2       | -1.23 | 2.09 | -1.78  | 0.00 | 0.001 | 0.11  |
| 9130008F23Rik | -1.23 | 1.23 | -1.41  | 0.00 | 0.002 | -0.42 |
| Tmem106c      | -1.23 | 4.73 | -10.30 | 0.00 | 0.000 | 7.93  |
| Rpl15-ps2     | -1.23 | 0.49 | -1.02  | 0.00 | 0.003 | -1.04 |
| Gm14286       | -1.23 | 0.03 | -1.42  | 0.03 | 0.047 | -3.89 |
| Sorbs3        | -1.23 | 5.91 | -12.74 | 0.00 | 0.000 | 10.50 |
| Inpp5k        | -1.23 | 3.84 | -1.85  | 0.00 | 0.000 | 4.80  |
| Cpne7         | -1.23 | 4.62 | -1.39  | 0.00 | 0.000 | 4.02  |
| Psm8          | -1.23 | 4.18 | -1.38  | 0.00 | 0.000 | 6.87  |
| Mmaa          | -1.23 | 3.64 | -1.78  | 0.00 | 0.000 | 4.77  |
| Plekha3       | -1.23 | 4.79 | -10.10 | 0.00 | 0.000 | 7.71  |
| Fam131a       | -1.23 | 2.91 | -1.81  | 0.00 | 0.000 | 3.40  |
| Six5          | -1.23 | 3.82 | -1.46  | 0.00 | 0.000 | 4.23  |
| Ss18l2        | -1.23 | 3.53 | -1.49  | 0.00 | 0.000 | 5.81  |
| Dennd5b       | -1.22 | 5.74 | -1.63  | 0.00 | 0.000 | 5.66  |
| Gramd2        | -1.22 | 0.58 | -1.81  | 0.00 | 0.004 | -1.47 |
| Zfp579        | -1.22 | 3.57 | -1.11  | 0.00 | 0.000 | 2.12  |
| Dab2          | -1.22 | 5.65 | -1.45  | 0.00 | 0.000 | 6.77  |
| Aamdc         | -1.22 | 2.97 | -1.42  | 0.00 | 0.000 | 2.72  |
| Mtln          | -1.22 | 2.52 | -1.42  | 0.00 | 0.000 | 1.18  |
| Sirt4         | -1.22 | 2.82 | -1.02  | 0.00 | 0.000 | 3.75  |
| Arsg          | -1.22 | 1.97 | -1.46  | 0.00 | 0.000 | 2.97  |
| Lipt1         | -1.22 | 3.08 | -1.10  | 0.00 | 0.000 | 3.82  |
| Zbtb12        | -1.22 | 4.96 | -12.13 | 0.00 | 0.000 | 9.95  |
| Rusc2         | -1.22 | 5.94 | -13.20 | 0.00 | 0.000 | 10.99 |
| Gm5644        | -1.22 | 0.38 | -1.56  | 0.00 | 0.007 | -1.91 |
| Tecr          | -1.22 | 6.77 | -12.11 | 0.00 | 0.000 | 9.80  |
| Pecr          | -1.22 | 4.53 | -11.12 | 0.00 | 0.000 | 8.93  |
| Cmb1          | -1.22 | 1.25 | -1.28  | 0.00 | 0.000 | 1.02  |
| Timm21        | -1.22 | 3.88 | -1.76  | 0.00 | 0.000 | 4.70  |
| Gm13657       | -1.22 | 0.10 | -1.62  | 0.00 | 0.006 | -1.80 |
| Bphl          | -1.22 | 4.41 | -11.17 | 0.00 | 0.000 | 8.99  |
| Tnfsf13       | -1.22 | 0.46 | -1.31  | 0.01 | 0.010 | -2.49 |
| Rpl36-ps3     | -1.22 | 0.15 | -1.21  | 0.01 | 0.012 | -2.53 |
| Gm42688       | -1.21 | 0.00 | -1.87  | 0.01 | 0.022 | -3.12 |
| Aldh3b1       | -1.21 | 4.97 | -10.81 | 0.00 | 0.000 | 8.50  |
| Nrg2          | -1.21 | 3.83 | -1.74  | 0.00 | 0.000 | 6.10  |
| Map1lc3a      | -1.21 | 4.99 | -10.25 | 0.00 | 0.000 | 7.84  |
| Tnfaip2       | -1.21 | 6.93 | -15.33 | 0.00 | 0.000 | 12.86 |
| Gm41442       | -1.21 | 1.46 | -1.25  | 0.00 | 0.000 | 1.03  |
| Irx5          | -1.21 | 0.60 | -1.43  | 0.00 | 0.008 | -2.29 |
| Man2b2        | -1.21 | 5.45 | -12.59 | 0.00 | 0.000 | 10.39 |
| Dync2h1       | -1.21 | 3.64 | -1.12  | 0.00 | 0.000 | 3.77  |
| Sdc2          | -1.21 | 6.13 | -13.96 | 0.00 | 0.000 | 11.68 |
| Gm9828        | -1.21 | 0.50 | -1.69  | 0.00 | 0.005 | -1.70 |
| Vamp4         | -1.21 | 5.13 | -12.29 | 0.00 | 0.000 | 10.12 |

|               |       |       |        |      |       |       |
|---------------|-------|-------|--------|------|-------|-------|
| Ackr3         | −1.21 | 3.17  | −1.14  | 0.00 | 0.000 | 3.89  |
| Kcnq1ot1      | −1.21 | 3.55  | −1.48  | 0.03 | 0.043 | −4.66 |
| Spsb2         | −1.21 | 4.28  | −1.12  | 0.00 | 0.000 | 5.13  |
| Bcl2l12       | −1.20 | 3.81  | −1.92  | 0.00 | 0.000 | 3.40  |
| Zfp40         | −1.20 | 2.38  | −1.09  | 0.00 | 0.000 | 2.33  |
| Pbxip1        | −1.20 | 4.92  | −11.91 | 0.00 | 0.000 | 9.74  |
| Plin2         | −1.20 | 6.75  | −12.49 | 0.00 | 0.000 | 10.20 |
| Grk4          | −1.20 | 2.43  | −1.69  | 0.00 | 0.000 | 1.65  |
| Zmym6         | −1.20 | 4.81  | −1.70  | 0.00 | 0.000 | 1.18  |
| Zfp874a       | −1.20 | 3.20  | −1.86  | 0.00 | 0.000 | 3.44  |
| Gm6055        | −1.20 | 2.25  | −1.01  | 0.00 | 0.000 | 2.22  |
| Gm5963        | −1.20 | 2.70  | −1.47  | 0.00 | 0.001 | −0.65 |
| Rps12-ps4     | −1.20 | 4.23  | −1.80  | 0.00 | 0.001 | −0.33 |
| Rbms2         | −1.20 | 6.36  | −14.17 | 0.00 | 0.000 | 11.86 |
| Rab3il1       | −1.20 | 2.23  | −1.21  | 0.00 | 0.000 | 2.48  |
| Ralgds        | −1.20 | 5.51  | −12.85 | 0.00 | 0.000 | 10.65 |
| 5730455P16Rik | −1.20 | 3.70  | −1.12  | 0.00 | 0.000 | 5.25  |
| Jak3          | −1.20 | 5.05  | −11.92 | 0.00 | 0.000 | 9.72  |
| Bcl2          | −1.20 | 3.82  | −1.15  | 0.00 | 0.000 | 6.66  |
| Rb1           | −1.20 | 4.01  | −1.79  | 0.00 | 0.000 | 4.70  |
| Zfp112        | −1.20 | 0.41  | −1.92  | 0.00 | 0.004 | −1.25 |
| Evi2a         | −1.20 | 1.33  | −1.47  | 0.00 | 0.001 | −0.30 |
| Gata2         | 1.20  | 1.99  | 4.56   | 0.00 | 0.001 | −0.34 |
| Slc25a21      | 1.20  | 0.37  | 3.82   | 0.00 | 0.004 | −1.47 |
| D930048N14Rik | 1.20  | 1.16  | 4.38   | 0.00 | 0.002 | −0.50 |
| Slc35e1       | 1.20  | 5.80  | 12.46  | 0.00 | 0.000 | 10.22 |
| Gm8666        | 1.20  | 1.46  | 4.79   | 0.00 | 0.001 | 0.22  |
| Gstm7         | 1.20  | 1.59  | 5.32   | 0.00 | 0.000 | 1.06  |
| Spag5         | 1.20  | 5.94  | 11.96  | 0.00 | 0.000 | 9.68  |
| Ccnd3         | 1.20  | 6.74  | 9.78   | 0.00 | 0.000 | 7.09  |
| Opn3          | 1.20  | 1.57  | 4.82   | 0.00 | 0.001 | 0.22  |
| Ccdc91        | 1.20  | 5.99  | 11.59  | 0.00 | 0.000 | 9.28  |
| Wdr4          | 1.20  | 5.82  | 11.73  | 0.00 | 0.000 | 9.44  |
| Birc5         | 1.20  | 6.45  | 12.23  | 0.00 | 0.000 | 9.93  |
| Srsf1         | 1.20  | 7.82  | 12.49  | 0.00 | 0.000 | 10.15 |
| Gm6501        | 1.20  | 1.97  | 5.16   | 0.00 | 0.000 | 0.78  |
| Eif2b1        | 1.21  | 5.73  | 9.95   | 0.00 | 0.000 | 7.37  |
| Fancb         | 1.21  | 2.66  | 6.00   | 0.00 | 0.000 | 2.10  |
| Sf3b3         | 1.21  | 7.86  | 13.37  | 0.00 | 0.000 | 11.04 |
| AC090479.2    | 1.21  | 0.02  | 2.51   | 0.03 | 0.040 | −3.76 |
| Tpm3-rs7      | 1.21  | 4.25  | 9.40   | 0.00 | 0.000 | 6.87  |
| Cse1l         | 1.21  | 6.58  | 12.36  | 0.00 | 0.000 | 10.07 |
| Ccnf          | 1.21  | 6.61  | 10.99  | 0.00 | 0.000 | 8.55  |
| Itga3         | 1.21  | 6.51  | 15.00  | 0.00 | 0.000 | 12.58 |
| Lrrc73        | 1.22  | 1.96  | 4.41   | 0.00 | 0.002 | −0.65 |
| Gm7233        | 1.22  | −1.20 | 2.65   | 0.02 | 0.031 | −3.54 |
| Mcm10         | 1.22  | 5.49  | 12.54  | 0.00 | 0.000 | 10.32 |
| Aunip         | 1.22  | 4.34  | 8.80   | 0.00 | 0.000 | 6.05  |
| Pex26         | 1.22  | 4.07  | 9.46   | 0.00 | 0.000 | 6.92  |
| Sgsm1         | 1.22  | 5.08  | 9.93   | 0.00 | 0.000 | 7.42  |
| Enoph1        | 1.22  | 5.54  | 13.79  | 0.00 | 0.000 | 11.56 |



|               |      |       |       |      |       |       |
|---------------|------|-------|-------|------|-------|-------|
| Notch2        | 1.22 | 7.62  | 10.29 | 0.00 | 0.000 | 7.68  |
| Gm7292        | 1.22 | 0.53  | 3.71  | 0.00 | 0.005 | -1.70 |
| Spns3         | 1.22 | -1.08 | 3.58  | 0.00 | 0.006 | -1.85 |
| 6030458C11Rik | 1.22 | 5.54  | 13.68 | 0.00 | 0.000 | 11.44 |
| Artn          | 1.22 | 3.53  | 8.94  | 0.00 | 0.000 | 6.38  |
| AC131675.2    | 1.23 | 1.93  | 6.04  | 0.00 | 0.000 | 2.31  |
| Spc24         | 1.23 | 4.93  | 11.92 | 0.00 | 0.000 | 9.73  |
| Slc25a43      | 1.23 | 1.35  | 5.72  | 0.00 | 0.000 | 1.82  |
| Ticrr         | 1.23 | 5.25  | 12.38 | 0.00 | 0.000 | 10.17 |
| Fbxl15        | 1.23 | 2.39  | 7.61  | 0.00 | 0.000 | 4.67  |
| Rnf34         | 1.23 | 4.66  | 11.24 | 0.00 | 0.000 | 9.01  |
| Entpd5        | 1.23 | 3.44  | 5.51  | 0.00 | 0.000 | 1.13  |
| Abhd11        | 1.23 | 4.48  | 10.64 | 0.00 | 0.000 | 8.36  |
| Kntc1         | 1.23 | 5.55  | 10.67 | 0.00 | 0.000 | 8.26  |
| Baz1b         | 1.24 | 7.47  | 13.49 | 0.00 | 0.000 | 11.16 |
| Hcfc1         | 1.24 | 7.57  | 10.42 | 0.00 | 0.000 | 7.84  |
| Tubb4b        | 1.24 | 8.55  | 13.98 | 0.00 | 0.000 | 11.62 |
| Gm12919       | 1.24 | 0.24  | 4.26  | 0.00 | 0.002 | -0.59 |
| Gm12854       | 1.24 | 1.03  | 4.50  | 0.00 | 0.001 | -0.29 |
| Gm7665        | 1.24 | 2.73  | 6.58  | 0.00 | 0.000 | 3.02  |
| Rbm27         | 1.24 | 5.89  | 10.19 | 0.00 | 0.000 | 7.65  |
| Nbn           | 1.25 | 4.74  | 10.48 | 0.00 | 0.000 | 8.14  |
| 1700008J07Rik | 1.25 | 0.59  | 4.67  | 0.00 | 0.001 | 0.08  |
| Coq5          | 1.25 | 5.43  | 11.65 | 0.00 | 0.000 | 9.38  |
| 3010003L21Rik | 1.25 | 1.87  | 5.04  | 0.00 | 0.001 | 0.50  |
| Rfc2          | 1.25 | 5.75  | 13.03 | 0.00 | 0.000 | 10.80 |
| Gm15850       | 1.25 | 1.10  | 3.47  | 0.00 | 0.008 | -2.21 |
| Otud6b        | 1.25 | 5.42  | 9.28  | 0.00 | 0.000 | 6.54  |
| Gm5864        | 1.25 | 0.31  | 3.86  | 0.00 | 0.004 | -1.37 |
| Fbxl14        | 1.25 | 6.14  | 14.24 | 0.00 | 0.000 | 11.92 |
| Ap1ar         | 1.25 | 5.79  | 12.42 | 0.00 | 0.000 | 10.18 |
| Gm20604       | 1.26 | 1.02  | 4.54  | 0.00 | 0.001 | -0.23 |
| Fgf21         | 1.26 | 1.32  | 4.52  | 0.00 | 0.001 | -0.36 |
| Prrg2         | 1.26 | 2.87  | 6.27  | 0.00 | 0.000 | 2.45  |
| Pcgf6         | 1.26 | 6.01  | 13.68 | 0.00 | 0.000 | 11.41 |
| Slc25a5       | 1.26 | 7.91  | 15.62 | 0.00 | 0.000 | 13.08 |
| Gm15387       | 1.26 | 0.78  | 4.71  | 0.00 | 0.001 | 0.15  |
| Lbh           | 1.26 | 1.67  | 5.87  | 0.00 | 0.000 | 2.08  |
| Zfp664        | 1.26 | 6.00  | 13.05 | 0.00 | 0.000 | 10.80 |
| Rai14         | 1.26 | 5.98  | 11.74 | 0.00 | 0.000 | 9.44  |
| AV356131      | 1.26 | 1.01  | 4.41  | 0.00 | 0.002 | -0.38 |
| Ssx2ip        | 1.27 | 5.01  | 12.44 | 0.00 | 0.000 | 10.26 |
| Rpa1          | 1.27 | 6.83  | 13.53 | 0.00 | 0.000 | 11.22 |
| Aven          | 1.27 | 4.37  | 10.00 | 0.00 | 0.000 | 7.62  |
| Iba57         | 1.27 | 2.16  | 6.22  | 0.00 | 0.000 | 2.48  |
| Ap4s1         | 1.27 | 3.01  | 8.65  | 0.00 | 0.000 | 6.05  |
| Ccne2         | 1.27 | 4.72  | 9.35  | 0.00 | 0.000 | 6.73  |
| Hmgn2         | 1.27 | 5.78  | 11.44 | 0.00 | 0.000 | 9.13  |
| Gm10156       | 1.27 | 1.21  | 4.88  | 0.00 | 0.001 | 0.42  |
| Adrm1         | 1.27 | 7.18  | 9.87  | 0.00 | 0.000 | 7.19  |
| Il4i1         | 1.27 | 1.52  | 4.73  | 0.00 | 0.001 | 0.08  |

|               |      |       |       |      |       |       |
|---------------|------|-------|-------|------|-------|-------|
| Nup155        | 1.27 | 6.25  | 13.71 | 0.00 | 0.000 | 11.42 |
| Pole          | 1.27 | 6.14  | 14.28 | 0.00 | 0.000 | 11.96 |
| Rrm1          | 1.27 | 7.83  | 13.53 | 0.00 | 0.000 | 11.19 |
| Reep6         | 1.28 | 8.01  | 11.47 | 0.00 | 0.000 | 9.06  |
| C030034I22Rik | 1.28 | 2.02  | 5.11  | 0.00 | 0.001 | 0.72  |
| Ldha          | 1.28 | 10.41 | 13.51 | 0.00 | 0.000 | 11.19 |
| Traf3ip1      | 1.28 | 3.92  | 8.58  | 0.00 | 0.000 | 5.81  |
| Phf19         | 1.28 | 5.53  | 12.50 | 0.00 | 0.000 | 10.28 |
| Gm17018       | 1.28 | 3.15  | 8.54  | 0.00 | 0.000 | 5.90  |
| Brca1         | 1.28 | 4.72  | 9.58  | 0.00 | 0.000 | 7.02  |
| Prkcz         | 1.28 | 0.10  | 3.84  | 0.00 | 0.004 | -1.38 |
| Hspa12a       | 1.28 | 3.11  | 9.77  | 0.00 | 0.000 | 7.38  |
| Gm14117       | 1.29 | 0.44  | 4.01  | 0.00 | 0.003 | -1.10 |
| Gclm          | 1.29 | 5.80  | 10.67 | 0.00 | 0.000 | 8.24  |
| Rnf145        | 1.29 | 6.89  | 15.67 | 0.00 | 0.000 | 13.14 |
| 5033406O09Rik | 1.29 | 0.13  | 4.30  | 0.00 | 0.002 | -0.52 |
| Eif3b         | 1.29 | 9.15  | 13.02 | 0.00 | 0.000 | 10.70 |
| Hmgb1-ps2     | 1.29 | 0.94  | 5.03  | 0.00 | 0.001 | 0.72  |
| Hsp90aa1      | 1.29 | 9.56  | 13.13 | 0.00 | 0.000 | 10.81 |
| AI661453      | 1.29 | 4.05  | 10.09 | 0.00 | 0.000 | 7.73  |
| Adamts1       | 1.29 | 4.52  | 10.94 | 0.00 | 0.000 | 8.74  |
| Tonsl         | 1.29 | 4.44  | 8.22  | 0.00 | 0.000 | 5.20  |
| AC122861.1    | 1.29 | 2.15  | 6.47  | 0.00 | 0.000 | 2.98  |
| Nasp          | 1.29 | 7.27  | 14.19 | 0.00 | 0.000 | 11.83 |
| Topbp1        | 1.29 | 7.07  | 14.47 | 0.00 | 0.000 | 12.09 |
| Ints2         | 1.29 | 4.11  | 8.22  | 0.00 | 0.000 | 5.30  |
| Crybg1        | 1.29 | 5.38  | 12.82 | 0.00 | 0.000 | 10.62 |
| Gm12435       | 1.30 | 2.70  | 7.90  | 0.00 | 0.000 | 5.06  |
| Avil          | 1.30 | 5.55  | 10.04 | 0.00 | 0.000 | 7.61  |
| Dsn1          | 1.30 | 4.31  | 10.57 | 0.00 | 0.000 | 8.29  |
| Nbl1          | 1.30 | 3.95  | 7.92  | 0.00 | 0.000 | 4.89  |
| Dyrk1b        | 1.30 | 0.29  | 4.07  | 0.00 | 0.003 | -0.98 |
| Bend3         | 1.30 | 5.18  | 11.07 | 0.00 | 0.000 | 8.76  |
| Ggact         | 1.30 | 3.43  | 7.63  | 0.00 | 0.000 | 4.54  |
| Rnf227        | 1.30 | 2.71  | 8.03  | 0.00 | 0.000 | 5.24  |
| Gm48583       | 1.30 | 1.10  | 4.80  | 0.00 | 0.001 | 0.28  |
| N4bp2         | 1.30 | 1.69  | 4.84  | 0.00 | 0.001 | 0.21  |
| Ubxn8         | 1.31 | 3.08  | 7.65  | 0.00 | 0.000 | 4.65  |
| Dhcr24        | 1.31 | 5.86  | 13.24 | 0.00 | 0.000 | 10.99 |
| Fanci         | 1.31 | 3.82  | 10.28 | 0.00 | 0.000 | 8.01  |
| Azin1         | 1.31 | 7.05  | 11.92 | 0.00 | 0.000 | 9.57  |
| Rrp12         | 1.31 | 5.76  | 10.82 | 0.00 | 0.000 | 8.42  |
| Prps1l3       | 1.31 | 5.14  | 9.01  | 0.00 | 0.000 | 6.21  |
| Gbe1          | 1.32 | 0.91  | 3.32  | 0.01 | 0.010 | -2.44 |
| Otud3         | 1.32 | 3.48  | 7.37  | 0.00 | 0.000 | 4.15  |
| Psph          | 1.32 | 6.62  | 15.13 | 0.00 | 0.000 | 12.70 |
| Gm7125        | 1.32 | -1.13 | 3.79  | 0.00 | 0.005 | -1.43 |
| Kn11          | 1.33 | 5.40  | 7.86  | 0.00 | 0.000 | 4.58  |
| Gm7931        | 1.33 | 0.33  | 4.23  | 0.00 | 0.002 | -0.66 |
| Gm4285        | 1.33 | 0.13  | 3.14  | 0.01 | 0.014 | -2.70 |
| Id2           | 1.33 | 3.74  | 6.77  | 0.00 | 0.000 | 3.17  |

|               |      |       |       |      |       |       |
|---------------|------|-------|-------|------|-------|-------|
| Chek1         | 1.33 | 4.95  | 10.83 | 0.00 | 0.000 | 8.53  |
| Gm42715       | 1.33 | −1.10 | 3.68  | 0.00 | 0.005 | −1.66 |
| 2200002D01Rik | 1.33 | 3.86  | 9.53  | 0.00 | 0.000 | 7.09  |
| Prpf3         | 1.33 | 6.69  | 11.45 | 0.00 | 0.000 | 9.08  |
| Rgs19         | 1.33 | 3.77  | 9.98  | 0.00 | 0.000 | 7.66  |
| Chaf1a        | 1.33 | 6.71  | 12.43 | 0.00 | 0.000 | 10.12 |
| Slc7a11       | 1.33 | 3.91  | 8.15  | 0.00 | 0.000 | 5.21  |
| Sgms2         | 1.34 | 4.74  | 9.48  | 0.00 | 0.000 | 6.89  |
| AC168306.1    | 1.34 | 0.83  | 4.87  | 0.00 | 0.001 | 0.42  |
| Chtf18        | 1.34 | 4.96  | 11.08 | 0.00 | 0.000 | 8.81  |
| Snhg10        | 1.34 | −1.12 | 2.99  | 0.01 | 0.018 | −2.88 |
| Haus5         | 1.34 | 0.97  | 4.30  | 0.00 | 0.002 | −0.61 |
| Gm12346       | 1.34 | 5.39  | 12.51 | 0.00 | 0.000 | 10.31 |
| Hsph1         | 1.35 | 7.48  | 13.20 | 0.00 | 0.000 | 10.88 |
| Tpi-rs11      | 1.35 | 1.23  | 5.02  | 0.00 | 0.001 | 0.64  |
| Cdon          | 1.35 | 3.30  | 7.57  | 0.00 | 0.000 | 4.47  |
| Slc29a4       | 1.35 | −1.33 | 3.38  | 0.00 | 0.009 | −2.28 |
| 3110083C13Rik | 1.35 | 1.75  | 5.06  | 0.00 | 0.001 | 0.64  |
| Gm5487        | 1.35 | 1.93  | 5.53  | 0.00 | 0.000 | 1.43  |
| Rps6ka1       | 1.36 | 4.18  | 11.74 | 0.00 | 0.000 | 9.61  |
| Cdc45         | 1.36 | 4.81  | 9.72  | 0.00 | 0.000 | 7.19  |
| Uchl3         | 1.36 | 5.63  | 13.39 | 0.00 | 0.000 | 11.17 |
| Hmgxb4        | 1.36 | 3.86  | 11.53 | 0.00 | 0.000 | 9.44  |
| Ide           | 1.36 | 6.29  | 13.20 | 0.00 | 0.000 | 10.93 |
| Tarbp2        | 1.36 | 4.20  | 10.45 | 0.00 | 0.000 | 8.17  |
| Gbx2          | 1.36 | 1.03  | 4.83  | 0.00 | 0.001 | 0.35  |
| Tubb4b-ps1    | 1.36 | 2.95  | 8.63  | 0.00 | 0.000 | 6.03  |
| Rffl          | 1.37 | 2.10  | 6.78  | 0.00 | 0.000 | 3.47  |
| Rhpn2         | 1.37 | 4.32  | 11.77 | 0.00 | 0.000 | 9.65  |
| Sars2         | 1.37 | 3.56  | 7.46  | 0.00 | 0.000 | 4.29  |
| Relt          | 1.37 | 3.32  | 9.43  | 0.00 | 0.000 | 7.07  |
| Gm11175       | 1.37 | 2.72  | 6.24  | 0.00 | 0.000 | 2.48  |
| Gm9774        | 1.37 | 3.35  | 7.75  | 0.00 | 0.000 | 4.74  |
| Gm3325        | 1.37 | 2.07  | 4.31  | 0.00 | 0.002 | −0.82 |
| Dock4         | 1.37 | 3.49  | 6.48  | 0.00 | 0.000 | 2.70  |
| Gm9761        | 1.38 | 1.94  | 7.57  | 0.00 | 0.000 | 4.67  |
| Ddias         | 1.38 | 3.12  | 8.17  | 0.00 | 0.000 | 5.40  |
| Mcm4          | 1.38 | 6.24  | 12.30 | 0.00 | 0.000 | 10.03 |
| Cdca5         | 1.38 | 5.29  | 12.52 | 0.00 | 0.000 | 10.32 |
| Sh3tc1        | 1.38 | 1.59  | 7.08  | 0.00 | 0.000 | 3.96  |
| Pom121        | 1.38 | 7.11  | 17.06 | 0.00 | 0.000 | 14.26 |
| Vps33a        | 1.38 | 5.49  | 11.97 | 0.00 | 0.000 | 9.73  |
| Bicdl1        | 1.38 | 2.84  | 8.16  | 0.00 | 0.000 | 5.40  |
| Sptb          | 1.38 | 1.18  | 4.52  | 0.00 | 0.001 | −0.15 |
| Llgl2         | 1.39 | 3.01  | 8.74  | 0.00 | 0.000 | 6.15  |
| Coa7          | 1.39 | 3.99  | 10.08 | 0.00 | 0.000 | 7.75  |
| Mad1l1        | 1.39 | 5.71  | 11.43 | 0.00 | 0.000 | 9.12  |
| Mcm7          | 1.39 | 7.41  | 14.08 | 0.00 | 0.000 | 11.73 |
| Esco2         | 1.40 | 4.62  | 13.85 | 0.00 | 0.000 | 11.69 |
| Gm7446        | 1.40 | 1.72  | 6.08  | 0.00 | 0.000 | 2.39  |
| Ing5          | 1.40 | 4.73  | 10.50 | 0.00 | 0.000 | 8.16  |

|               |      |       |       |      |       |       |
|---------------|------|-------|-------|------|-------|-------|
| Padi4         | 1.40 | 0.70  | 5.06  | 0.00 | 0.001 | 0.72  |
| Dhx37         | 1.40 | 5.77  | 12.85 | 0.00 | 0.000 | 10.61 |
| Gm5529        | 1.40 | 0.62  | 4.52  | 0.00 | 0.001 | -0.16 |
| Sart3         | 1.40 | 6.07  | 12.70 | 0.00 | 0.000 | 10.45 |
| Bms1          | 1.40 | 6.98  | 16.33 | 0.00 | 0.000 | 13.69 |
| Parvg         | 1.40 | 0.10  | 4.28  | 0.00 | 0.002 | -0.51 |
| Sfpq          | 1.40 | 7.47  | 12.91 | 0.00 | 0.000 | 10.59 |
| Tnfrsf23      | 1.41 | 3.67  | 10.58 | 0.00 | 0.000 | 8.39  |
| Wdr76         | 1.41 | 3.68  | 10.16 | 0.00 | 0.000 | 7.89  |
| Sept11        | 1.41 | 7.57  | 12.49 | 0.00 | 0.000 | 10.16 |
| Lbhd1         | 1.41 | 1.64  | 6.30  | 0.00 | 0.000 | 2.75  |
| Mthfsl        | 1.41 | 0.09  | 3.99  | 0.00 | 0.003 | -1.04 |
| Ect2          | 1.41 | 6.41  | 10.78 | 0.00 | 0.000 | 8.33  |
| Uchl4         | 1.41 | 0.75  | 4.98  | 0.00 | 0.001 | 0.64  |
| Ppip5k2       | 1.42 | 6.17  | 12.15 | 0.00 | 0.000 | 9.87  |
| Pcdh10        | 1.42 | 1.21  | 5.16  | 0.00 | 0.000 | 0.88  |
| Gm9144        | 1.42 | 0.21  | 4.29  | 0.00 | 0.002 | -0.56 |
| 2410131K14Rik | 1.42 | 4.81  | 11.38 | 0.00 | 0.000 | 9.15  |
| Lrrc14b       | 1.42 | -1.37 | 3.92  | 0.00 | 0.004 | -1.24 |
| Chml          | 1.42 | 4.31  | 8.13  | 0.00 | 0.000 | 5.12  |
| Noc4l         | 1.42 | 5.92  | 11.91 | 0.00 | 0.000 | 9.63  |
| BC085271      | 1.43 | 1.22  | 6.15  | 0.00 | 0.000 | 2.60  |
| Gm10282       | 1.43 | 4.29  | 12.23 | 0.00 | 0.000 | 10.15 |
| Slc4a11       | 1.43 | 4.38  | 12.12 | 0.00 | 0.000 | 10.00 |
| Pgam5         | 1.43 | 6.02  | 16.72 | 0.00 | 0.000 | 14.04 |
| Mirt1         | 1.43 | 0.82  | 4.12  | 0.00 | 0.003 | -0.92 |
| Zgrf1         | 1.44 | 3.10  | 8.23  | 0.00 | 0.000 | 5.48  |
| Gm5452        | 1.44 | 0.61  | 5.12  | 0.00 | 0.001 | 0.92  |
| Ubash3b       | 1.44 | 3.75  | 11.30 | 0.00 | 0.000 | 9.21  |
| Lrr1          | 1.44 | 2.59  | 9.12  | 0.00 | 0.000 | 6.73  |
| Gm5847        | 1.45 | 0.26  | 4.40  | 0.00 | 0.002 | -0.31 |
| Phlda2        | 1.45 | 5.13  | 13.28 | 0.00 | 0.000 | 11.10 |
| Gm6750        | 1.45 | 0.28  | 4.87  | 0.00 | 0.001 | 0.51  |
| Lactb         | 1.45 | 4.83  | 14.05 | 0.00 | 0.000 | 11.86 |
| Rpa2          | 1.46 | 5.18  | 13.00 | 0.00 | 0.000 | 10.82 |
| Cdsn          | 1.47 | 5.60  | 11.61 | 0.00 | 0.000 | 9.41  |
| Gusb          | 1.47 | 5.89  | 16.77 | 0.00 | 0.000 | 14.09 |
| AC135509.1    | 1.47 | -1.10 | 4.54  | 0.00 | 0.001 | -0.04 |
| Cry1          | 1.47 | 4.49  | 12.77 | 0.00 | 0.000 | 10.68 |
| Kif24         | 1.47 | 2.75  | 6.48  | 0.00 | 0.000 | 2.88  |
| Gm5844        | 1.48 | 3.41  | 10.12 | 0.00 | 0.000 | 7.91  |
| Clspn         | 1.48 | 5.26  | 13.39 | 0.00 | 0.000 | 11.19 |
| Gm29093       | 1.48 | 0.39  | 4.74  | 0.00 | 0.001 | 0.26  |
| Sssca1        | 1.48 | 1.34  | 5.20  | 0.00 | 0.000 | 0.94  |
| Gm48284       | 1.48 | 0.30  | 4.11  | 0.00 | 0.003 | -0.91 |
| Acyp2         | 1.48 | 1.00  | 3.42  | 0.00 | 0.008 | -2.25 |
| Gm11814       | 1.49 | 0.26  | 4.96  | 0.00 | 0.001 | 0.69  |
| BC005561      | 1.49 | 1.96  | 4.03  | 0.00 | 0.003 | -1.33 |
| Galnt3        | 1.49 | 4.09  | 11.96 | 0.00 | 0.000 | 9.88  |
| Cpsf2         | 1.49 | 6.03  | 14.34 | 0.00 | 0.000 | 12.03 |
| N6amt1        | 1.49 | 3.95  | 11.25 | 0.00 | 0.000 | 9.14  |

|               |      |       |       |      |       |       |
|---------------|------|-------|-------|------|-------|-------|
| Lmln          | 1.50 | 2.63  | 8.57  | 0.00 | 0.000 | 6.00  |
| 4921531C22Rik | 1.50 | 0.09  | 4.21  | 0.00 | 0.002 | -0.67 |
| Dnajc9        | 1.50 | 5.05  | 15.93 | 0.00 | 0.000 | 13.47 |
| Tes           | 1.50 | 6.64  | 18.71 | 0.00 | 0.000 | 15.50 |
| Cars2         | 1.50 | 4.00  | 11.50 | 0.00 | 0.000 | 9.40  |
| Mapkapk5      | 1.50 | -1.07 | 3.76  | 0.00 | 0.005 | -1.46 |
| Mgst3         | 1.50 | 2.99  | 9.26  | 0.00 | 0.000 | 6.84  |
| Lrrc59        | 1.51 | 7.85  | 16.70 | 0.00 | 0.000 | 13.97 |
| Ly6a          | 1.51 | 0.48  | 4.00  | 0.00 | 0.003 | -1.16 |
| Siah1b        | 1.51 | 2.23  | 7.14  | 0.00 | 0.000 | 4.00  |
| Tns3          | 1.51 | 3.92  | 12.55 | 0.00 | 0.000 | 10.50 |
| Rtl10         | 1.51 | -1.11 | 4.82  | 0.00 | 0.001 | 0.46  |
| Pappa2        | 1.52 | -1.05 | 2.97  | 0.01 | 0.018 | -2.92 |
| Anapc5        | 1.52 | 7.64  | 17.34 | 0.00 | 0.000 | 14.47 |
| Eif5          | 1.52 | 8.06  | 13.33 | 0.00 | 0.000 | 11.00 |
| Apobec3       | 1.52 | 2.03  | 7.75  | 0.00 | 0.000 | 4.85  |
| Melk          | 1.52 | 5.25  | 14.32 | 0.00 | 0.000 | 12.07 |
| AC133523.4    | 1.52 | 0.39  | 4.35  | 0.00 | 0.002 | -0.44 |
| Zik1          | 1.52 | 2.35  | 6.51  | 0.00 | 0.000 | 3.00  |
| Snai2         | 1.52 | 1.48  | 5.33  | 0.00 | 0.000 | 1.21  |
| Ppa1          | 1.52 | 7.31  | 16.14 | 0.00 | 0.000 | 13.53 |
| Sh3tc2        | 1.53 | 3.96  | 11.92 | 0.00 | 0.000 | 9.87  |
| Slc25a10      | 1.53 | 5.20  | 10.90 | 0.00 | 0.000 | 8.57  |
| Fut11         | 1.53 | 0.69  | 5.47  | 0.00 | 0.000 | 1.51  |
| Ankrd13a      | 1.53 | 6.98  | 17.61 | 0.00 | 0.000 | 14.68 |
| Hmga2         | 1.53 | 6.96  | 16.84 | 0.00 | 0.000 | 14.09 |
| Hist1h1c      | 1.53 | 3.26  | 9.16  | 0.00 | 0.000 | 6.72  |
| Tyms          | 1.54 | 4.77  | 12.39 | 0.00 | 0.000 | 10.26 |
| Nudt15        | 1.54 | 0.54  | 6.04  | 0.00 | 0.000 | 2.48  |
| Ccdc86        | 1.55 | 5.59  | 10.87 | 0.00 | 0.000 | 8.49  |
| Pdss1         | 1.55 | 4.06  | 12.24 | 0.00 | 0.000 | 10.19 |
| Rwdd2b        | 1.56 | 2.26  | 8.78  | 0.00 | 0.000 | 6.33  |
| Tmem79        | 1.56 | 1.47  | 5.87  | 0.00 | 0.000 | 2.09  |
| Pnp2          | 1.56 | 1.10  | 6.78  | 0.00 | 0.000 | 3.58  |
| Wdhd1         | 1.56 | 5.36  | 15.53 | 0.00 | 0.000 | 13.12 |
| Serpinb9b     | 1.56 | 5.93  | 17.59 | 0.00 | 0.000 | 14.73 |
| Dusp3         | 1.56 | 5.97  | 14.87 | 0.00 | 0.000 | 12.52 |
| Adm2          | 1.57 | 5.59  | 11.02 | 0.00 | 0.000 | 8.66  |
| Prph          | 1.57 | -1.30 | 3.43  | 0.00 | 0.008 | -2.09 |
| Fam241a       | 1.57 | 3.18  | 8.91  | 0.00 | 0.000 | 6.41  |
| Dnaaf5        | 1.57 | 5.33  | 16.38 | 0.00 | 0.000 | 13.82 |
| Itgb7         | 1.57 | 4.89  | 12.26 | 0.00 | 0.000 | 10.17 |
| Zfp568        | 1.58 | 4.85  | 10.81 | 0.00 | 0.000 | 8.50  |
| Hist1h3d      | 1.58 | 0.21  | 4.04  | 0.00 | 0.003 | -1.01 |
| 2700038G22Rik | 1.58 | 1.99  | 6.38  | 0.00 | 0.000 | 2.88  |
| Ncbp2         | 1.58 | 4.58  | 14.12 | 0.00 | 0.000 | 11.94 |
| Dhx9          | 1.58 | 7.00  | 13.67 | 0.00 | 0.000 | 11.35 |
| E2f2          | 1.59 | 4.76  | 11.66 | 0.00 | 0.000 | 9.48  |
| Gnptab        | 1.59 | 7.09  | 13.42 | 0.00 | 0.000 | 11.11 |
| Cenpu         | 1.59 | 4.22  | 14.18 | 0.00 | 0.000 | 12.03 |
| Slc25a22      | 1.59 | 4.78  | 13.51 | 0.00 | 0.000 | 11.36 |

|               |      |       |       |      |       |       |
|---------------|------|-------|-------|------|-------|-------|
| Cpeb2         | 1.60 | 3.77  | 7.17  | 0.00 | 0.000 | 3.79  |
| Dis3          | 1.60 | 5.72  | 14.24 | 0.00 | 0.000 | 11.96 |
| Pfkfb1        | 1.60 | 1.18  | 6.08  | 0.00 | 0.000 | 2.47  |
| Smg5          | 1.60 | 7.37  | 15.55 | 0.00 | 0.000 | 13.03 |
| Bpifb4        | 1.61 | 0.08  | 4.24  | 0.00 | 0.002 | -0.62 |
| Pclaf         | 1.61 | 4.96  | 15.25 | 0.00 | 0.000 | 12.91 |
| Ldha-ps2      | 1.61 | 1.64  | 7.47  | 0.00 | 0.000 | 4.60  |
| B230377A18Rik | 1.61 | -1.07 | 3.87  | 0.00 | 0.004 | -1.30 |
| Ckb           | 1.61 | 2.98  | 10.81 | 0.00 | 0.000 | 8.74  |
| Figl1         | 1.62 | 4.45  | 14.24 | 0.00 | 0.000 | 12.07 |
| 6430548M08Rik | 1.62 | 4.46  | 12.66 | 0.00 | 0.000 | 10.53 |
| Gm36266       | 1.62 | -1.28 | 3.01  | 0.01 | 0.017 | -2.81 |
| Jup           | 1.62 | 6.40  | 14.10 | 0.00 | 0.000 | 11.76 |
| Epn3          | 1.62 | 3.05  | 10.16 | 0.00 | 0.000 | 7.97  |
| Tgfb2         | 1.63 | 0.67  | 5.57  | 0.00 | 0.000 | 1.69  |
| Pop1          | 1.63 | 4.87  | 12.13 | 0.00 | 0.000 | 9.98  |
| Gm9247        | 1.63 | 1.50  | 7.01  | 0.00 | 0.000 | 3.90  |
| Cass4         | 1.63 | 0.56  | 3.91  | 0.00 | 0.004 | -1.25 |
| Zfp985        | 1.64 | 4.04  | 12.57 | 0.00 | 0.000 | 10.51 |
| Dtx1          | 1.64 | 0.05  | 4.89  | 0.00 | 0.001 | 0.51  |
| Aldh1a3       | 1.64 | 0.12  | 4.72  | 0.00 | 0.001 | 0.28  |
| Arhgef28      | 1.64 | 1.93  | 8.03  | 0.00 | 0.000 | 5.35  |
| Nagpa         | 1.65 | 4.02  | 12.36 | 0.00 | 0.000 | 10.32 |
| Mns1          | 1.66 | 3.08  | 8.70  | 0.00 | 0.000 | 6.15  |
| Taf7          | 1.66 | 3.29  | 12.84 | 0.00 | 0.000 | 10.84 |
| Gm37691       | 1.67 | 0.00  | 4.57  | 0.00 | 0.001 | 0.04  |
| Isoc1         | 1.67 | 2.99  | 10.40 | 0.00 | 0.000 | 8.30  |
| Lck           | 1.67 | 2.69  | 8.90  | 0.00 | 0.000 | 6.46  |
| Hvcn1         | 1.68 | 1.28  | 6.06  | 0.00 | 0.000 | 2.44  |
| Nphp3         | 1.68 | 0.72  | 3.96  | 0.00 | 0.003 | -1.20 |
| Gm14124       | 1.68 | -1.27 | 4.06  | 0.00 | 0.003 | -0.94 |
| Thg1l         | 1.68 | 3.53  | 9.76  | 0.00 | 0.000 | 7.46  |
| Lrrc8b        | 1.69 | 4.59  | 12.73 | 0.00 | 0.000 | 10.62 |
| Ptgfrn        | 1.69 | 8.92  | 17.66 | 0.00 | 0.000 | 14.70 |
| Pnma3         | 1.69 | 0.30  | 5.40  | 0.00 | 0.000 | 1.43  |
| Krt8-ps       | 1.69 | 3.98  | 13.07 | 0.00 | 0.000 | 11.02 |
| Lmnb1         | 1.69 | 7.14  | 17.82 | 0.00 | 0.000 | 14.84 |
| Fam161b       | 1.69 | -1.19 | 4.24  | 0.00 | 0.002 | -0.58 |
| Sdr42e1       | 1.70 | -1.17 | 3.25  | 0.01 | 0.011 | -2.33 |
| Ptgis         | 1.70 | 0.78  | 5.14  | 0.00 | 0.001 | 0.87  |
| Orc1          | 1.70 | 3.35  | 12.11 | 0.00 | 0.000 | 10.12 |
| Gm10357       | 1.70 | -1.16 | 4.19  | 0.00 | 0.002 | -0.69 |
| Zfp473        | 1.70 | 2.43  | 7.74  | 0.00 | 0.000 | 4.84  |
| Ssc4d         | 1.71 | 3.34  | 10.90 | 0.00 | 0.000 | 8.80  |
| Gpatch3       | 1.71 | 2.59  | 8.87  | 0.00 | 0.000 | 6.40  |
| Ap5b1         | 1.71 | 3.36  | 10.90 | 0.00 | 0.000 | 8.78  |
| Ciart         | 1.71 | 5.43  | 16.94 | 0.00 | 0.000 | 14.26 |
| Gm37855       | 1.72 | 0.86  | 6.37  | 0.00 | 0.000 | 2.96  |
| Exo1          | 1.72 | 5.11  | 16.06 | 0.00 | 0.000 | 13.57 |
| Eme1          | 1.72 | 2.86  | 9.61  | 0.00 | 0.000 | 7.34  |
| Krt8          | 1.72 | 9.41  | 15.91 | 0.00 | 0.000 | 13.33 |

|               |      |       |       |      |       |       |
|---------------|------|-------|-------|------|-------|-------|
| Ptpn18        | 1.72 | −1.86 | 3.56  | 0.00 | 0.007 | −1.90 |
| Serpinb9      | 1.73 | 3.36  | 11.96 | 0.00 | 0.000 | 9.97  |
| Trim36        | 1.73 | 1.04  | 6.48  | 0.00 | 0.000 | 3.15  |
| Wars2         | 1.74 | 3.11  | 7.83  | 0.00 | 0.000 | 4.93  |
| Gm10516       | 1.74 | 1.37  | 7.41  | 0.00 | 0.000 | 4.52  |
| Ly9           | 1.74 | 1.59  | 7.60  | 0.00 | 0.000 | 4.78  |
| Fen1          | 1.75 | 5.60  | 14.15 | 0.00 | 0.000 | 11.87 |
| Rbm19         | 1.75 | 5.59  | 13.88 | 0.00 | 0.000 | 11.64 |
| Polq          | 1.75 | 3.82  | 10.93 | 0.00 | 0.000 | 8.80  |
| 4930503E14Rik | 1.76 | −1.14 | 4.57  | 0.00 | 0.001 | 0.04  |
| Gm4430        | 1.76 | 0.53  | 5.87  | 0.00 | 0.000 | 2.16  |
| Pfkfb2        | 1.77 | 0.68  | 4.01  | 0.00 | 0.003 | −1.13 |
| Uhrf1         | 1.77 | 7.35  | 18.11 | 0.00 | 0.000 | 15.06 |
| Fhdcl         | 1.77 | 3.66  | 13.80 | 0.00 | 0.000 | 11.72 |
| Gmfg          | 1.77 | 1.45  | 8.56  | 0.00 | 0.000 | 6.10  |
| Tedcl         | 1.78 | 4.24  | 16.29 | 0.00 | 0.000 | 13.80 |
| Utp14b        | 1.78 | 4.14  | 9.73  | 0.00 | 0.000 | 7.30  |
| Dna2          | 1.78 | 2.93  | 9.76  | 0.00 | 0.000 | 7.53  |
| Gm14276       | 1.79 | 1.47  | 7.77  | 0.00 | 0.000 | 5.03  |
| Slamf9        | 1.79 | 0.43  | 5.07  | 0.00 | 0.001 | 0.89  |
| Brpf3         | 1.79 | 3.90  | 13.23 | 0.00 | 0.000 | 11.18 |
| Stx1a         | 1.80 | 0.61  | 4.73  | 0.00 | 0.001 | 0.20  |
| Ocln          | 1.80 | 0.55  | 6.26  | 0.00 | 0.000 | 2.83  |
| Foxa1         | 1.80 | 2.35  | 9.47  | 0.00 | 0.000 | 7.21  |
| Tcam1         | 1.80 | 3.17  | 12.71 | 0.00 | 0.000 | 10.74 |
| Ift122        | 1.81 | 4.55  | 16.22 | 0.00 | 0.000 | 13.73 |
| Zfp978        | 1.82 | 0.34  | 3.82  | 0.00 | 0.004 | −1.45 |
| Pls1          | 1.82 | 0.26  | 4.85  | 0.00 | 0.001 | 0.50  |
| Hells         | 1.82 | 6.01  | 16.03 | 0.00 | 0.000 | 13.50 |
| BC039966      | 1.82 | −1.28 | 5.50  | 0.00 | 0.000 | 1.61  |
| Gm44335       | 1.83 | 0.33  | 6.10  | 0.00 | 0.000 | 2.59  |
| Gmpr          | 1.83 | −1.57 | 4.56  | 0.00 | 0.001 | −0.08 |
| 1700034H15Rik | 1.83 | −1.05 | 5.58  | 0.00 | 0.000 | 1.74  |
| Ctf1          | 1.83 | 1.48  | 7.96  | 0.00 | 0.000 | 5.30  |
| Ints1         | 1.83 | 6.17  | 16.20 | 0.00 | 0.000 | 13.63 |
| Gm5446        | 1.83 | 0.55  | 6.09  | 0.00 | 0.000 | 2.56  |
| Mphosph9      | 1.84 | 4.33  | 12.87 | 0.00 | 0.000 | 10.81 |
| Mcm5          | 1.84 | 6.91  | 15.57 | 0.00 | 0.000 | 13.07 |
| Gm9958        | 1.84 | 0.33  | 6.10  | 0.00 | 0.000 | 2.60  |
| Trim45        | 1.85 | 4.64  | 11.47 | 0.00 | 0.000 | 9.26  |
| Rad51         | 1.87 | 5.66  | 18.34 | 0.00 | 0.000 | 15.27 |
| Man1a2        | 1.87 | 7.44  | 21.18 | 0.00 | 0.000 | 17.13 |
| Fbxo48        | 1.87 | −1.09 | 4.05  | 0.00 | 0.003 | −0.93 |
| E2f7          | 1.88 | 4.41  | 15.50 | 0.00 | 0.000 | 13.16 |
| Hist1h3f      | 1.88 | −1.13 | 5.91  | 0.00 | 0.000 | 2.31  |
| Ksr2          | 1.89 | 4.72  | 13.89 | 0.00 | 0.000 | 11.73 |
| Fbxo2         | 1.89 | 1.69  | 6.73  | 0.00 | 0.000 | 3.37  |
| Ccne1         | 1.89 | 4.16  | 13.88 | 0.00 | 0.000 | 11.77 |
| Mboat1        | 1.89 | 1.92  | 9.13  | 0.00 | 0.000 | 6.83  |
| Sh3yl1        | 1.90 | 0.59  | 5.27  | 0.00 | 0.000 | 1.17  |
| Gm3320        | 1.90 | 1.65  | 7.10  | 0.00 | 0.000 | 4.05  |

|               |      |       |       |      |       |       |
|---------------|------|-------|-------|------|-------|-------|
| Angptl4       | 1.91 | 4.08  | 13.49 | 0.00 | 0.000 | 11.43 |
| Kbtbd8        | 1.92 | 2.77  | 9.28  | 0.00 | 0.000 | 6.94  |
| Mybl2         | 1.92 | 6.44  | 19.95 | 0.00 | 0.000 | 16.36 |
| Gm6970        | 1.92 | −1.91 | 3.47  | 0.00 | 0.008 | −2.03 |
| Acox2         | 1.92 | 2.14  | 7.51  | 0.00 | 0.000 | 4.64  |
| Gcnt1         | 1.94 | 4.31  | 14.63 | 0.00 | 0.000 | 12.42 |
| Homer1        | 1.95 | 3.01  | 11.02 | 0.00 | 0.000 | 8.99  |
| Lin54         | 1.95 | 4.72  | 12.09 | 0.00 | 0.000 | 9.95  |
| Tfcp2l1       | 1.95 | 1.40  | 7.19  | 0.00 | 0.000 | 4.23  |
| Hsd11b2       | 1.96 | −1.01 | 5.26  | 0.00 | 0.000 | 1.22  |
| Srrt          | 1.97 | 6.80  | 24.53 | 0.00 | 0.000 | 19.07 |
| Fcer2a        | 1.97 | 1.03  | 8.72  | 0.00 | 0.000 | 6.28  |
| 6330549D23Rik | 1.97 | 0.73  | 6.45  | 0.00 | 0.000 | 3.12  |
| Nudt1         | 1.97 | 2.71  | 8.36  | 0.00 | 0.000 | 5.76  |
| D130058E05Rik | 1.97 | 0.30  | 5.29  | 0.00 | 0.000 | 1.27  |
| AC113104.4    | 1.97 | −1.19 | 4.98  | 0.00 | 0.001 | 0.74  |
| 1110006O24Rik | 1.99 | −1.11 | 4.16  | 0.00 | 0.002 | −0.72 |
| Matn4         | 1.99 | 0.77  | 7.00  | 0.00 | 0.000 | 3.92  |
| Dpep1         | 2.00 | 1.63  | 9.60  | 0.00 | 0.000 | 7.41  |
| Haspin        | 2.00 | 3.86  | 11.77 | 0.00 | 0.000 | 9.70  |
| Usp2          | 2.02 | 2.76  | 12.58 | 0.00 | 0.000 | 10.63 |
| Sbsn          | 2.03 | 3.05  | 11.19 | 0.00 | 0.000 | 9.17  |
| Cbx2          | 2.04 | −1.01 | 4.76  | 0.00 | 0.001 | 0.34  |
| Clip4         | 2.04 | 1.68  | 9.55  | 0.00 | 0.000 | 7.36  |
| Gm2381        | 2.04 | 1.42  | 5.85  | 0.00 | 0.000 | 2.07  |
| Sdr39u1       | 2.04 | 4.60  | 15.41 | 0.00 | 0.000 | 13.07 |
| Sema4d        | 2.05 | 3.08  | 13.84 | 0.00 | 0.000 | 11.79 |
| Slco2a1       | 2.05 | 3.39  | 15.18 | 0.00 | 0.000 | 12.94 |
| Slc22a3       | 2.05 | 1.07  | 7.83  | 0.00 | 0.000 | 5.14  |
| Cyth4         | 2.06 | 2.00  | 8.51  | 0.00 | 0.000 | 6.00  |
| Ptpn3         | 2.06 | −1.08 | 6.05  | 0.00 | 0.000 | 2.50  |
| B130055M24Rik | 2.08 | 0.91  | 6.46  | 0.00 | 0.000 | 3.12  |
| Kcnh1         | 2.09 | 0.08  | 4.91  | 0.00 | 0.001 | 0.62  |
| Dhrs4         | 2.09 | 2.15  | 10.73 | 0.00 | 0.000 | 8.71  |
| Cd38          | 2.10 | 3.08  | 12.38 | 0.00 | 0.000 | 10.42 |
| Dnmt3l        | 2.10 | 1.82  | 8.15  | 0.00 | 0.000 | 5.57  |
| Krt80         | 2.10 | 3.06  | 11.17 | 0.00 | 0.000 | 9.17  |
| Plekhh1       | 2.10 | 3.66  | 13.99 | 0.00 | 0.000 | 11.90 |
| Rfc5          | 2.11 | 5.42  | 18.02 | 0.00 | 0.000 | 15.06 |
| 4931428F04Rik | 2.11 | 3.05  | 10.41 | 0.00 | 0.000 | 8.32  |
| Fhad1         | 2.11 | −1.09 | 6.70  | 0.00 | 0.000 | 3.52  |
| Alpl          | 2.12 | 1.07  | 6.94  | 0.00 | 0.000 | 3.78  |
| Amhr2         | 2.13 | 0.83  | 7.50  | 0.00 | 0.000 | 4.70  |
| Chrnbl        | 2.14 | 4.15  | 16.86 | 0.00 | 0.000 | 14.26 |
| Gm17399       | 2.15 | 0.28  | 5.59  | 0.00 | 0.000 | 1.76  |
| Dck           | 2.16 | 3.75  | 15.50 | 0.00 | 0.000 | 13.20 |
| Ccdc38        | 2.16 | 0.03  | 6.63  | 0.00 | 0.000 | 3.42  |
| Cdc6          | 2.17 | 3.87  | 14.21 | 0.00 | 0.000 | 12.09 |
| Ptpn6         | 2.17 | 2.20  | 11.24 | 0.00 | 0.000 | 9.26  |
| Gm5648        | 2.17 | 0.73  | 8.01  | 0.00 | 0.000 | 5.40  |
| Fam83a        | 2.18 | 1.02  | 8.14  | 0.00 | 0.000 | 5.56  |



|               |      |       |       |      |       |       |
|---------------|------|-------|-------|------|-------|-------|
| Dscc1         | 2.18 | 2.53  | 9.87  | 0.00 | 0.000 | 7.71  |
| Rmi2          | 2.19 | 3.53  | 14.68 | 0.00 | 0.000 | 12.52 |
| Kcnq1         | 2.19 | −1.45 | 5.54  | 0.00 | 0.000 | 1.68  |
| 4930461G14Rik | 2.19 | 1.00  | 10.20 | 0.00 | 0.000 | 8.11  |
| Cdkl2         | 2.19 | 3.80  | 14.39 | 0.00 | 0.000 | 12.26 |
| Gm47813       | 2.22 | 0.90  | 7.43  | 0.00 | 0.000 | 4.59  |
| Gpat2         | 2.22 | −1.66 | 5.65  | 0.00 | 0.000 | 1.84  |
| Tmco4         | 2.24 | 4.28  | 18.43 | 0.00 | 0.000 | 15.39 |
| 2310040G24Rik | 2.27 | 0.99  | 8.98  | 0.00 | 0.000 | 6.66  |
| Scel          | 2.27 | 1.07  | 7.39  | 0.00 | 0.000 | 4.50  |
| Ccdc120       | 2.30 | 0.75  | 7.51  | 0.00 | 0.000 | 4.71  |
| Samd10        | 2.30 | 2.21  | 10.62 | 0.00 | 0.000 | 8.59  |
| Gm35823       | 2.32 | 0.95  | 7.57  | 0.00 | 0.000 | 4.78  |
| Grhl2         | 2.33 | 0.30  | 7.05  | 0.00 | 0.000 | 4.05  |
| Rhof          | 2.34 | 0.49  | 7.85  | 0.00 | 0.000 | 5.16  |
| Bcar3         | 2.36 | 2.29  | 12.98 | 0.00 | 0.000 | 10.99 |
| Syne4         | 2.36 | 0.58  | 7.23  | 0.00 | 0.000 | 4.29  |
| Elovl3        | 2.40 | 2.12  | 9.70  | 0.00 | 0.000 | 7.53  |
| Zfp784        | 2.40 | −1.42 | 6.13  | 0.00 | 0.000 | 2.66  |
| Cdh24         | 2.41 | 0.36  | 6.06  | 0.00 | 0.000 | 2.52  |
| Mbnl3         | 2.42 | 2.37  | 8.33  | 0.00 | 0.000 | 5.73  |
| Sema4f        | 2.42 | −1.09 | 5.14  | 0.00 | 0.001 | 1.04  |
| Fnbp1l        | 2.43 | 3.63  | 16.84 | 0.00 | 0.000 | 14.24 |
| Sh3bp4        | 2.43 | 1.92  | 10.30 | 0.00 | 0.000 | 8.24  |
| Slc52a3       | 2.45 | 2.08  | 12.94 | 0.00 | 0.000 | 10.95 |
| Rasgrp3       | 2.48 | −1.39 | 4.71  | 0.00 | 0.001 | 0.31  |
| Tex101        | 2.48 | 3.32  | 12.11 | 0.00 | 0.000 | 10.12 |
| Tigit         | 2.49 | 3.63  | 18.46 | 0.00 | 0.000 | 15.39 |
| Trim66        | 2.50 | 0.49  | 7.39  | 0.00 | 0.000 | 4.54  |
| Omp           | 2.51 | −1.09 | 5.83  | 0.00 | 0.000 | 2.17  |
| Cyp4f40       | 2.52 | 0.91  | 7.72  | 0.00 | 0.000 | 4.99  |
| Traf1         | 2.54 | 2.28  | 10.35 | 0.00 | 0.000 | 8.28  |
| Tmem62        | 2.54 | 0.97  | 7.56  | 0.00 | 0.000 | 4.77  |
| Prss32        | 2.56 | −1.20 | 8.27  | 0.00 | 0.000 | 5.70  |
| Mat1a         | 2.59 | 0.40  | 7.18  | 0.00 | 0.000 | 4.23  |
| Ccdc169       | 2.60 | −1.17 | 6.42  | 0.00 | 0.000 | 3.10  |
| Sspo          | 2.61 | 2.27  | 7.56  | 0.00 | 0.000 | 4.75  |
| Cd74          | 2.62 | 1.49  | 10.19 | 0.00 | 0.000 | 8.08  |
| Gm38416       | 2.63 | −1.38 | 6.24  | 0.00 | 0.000 | 2.83  |
| Nfatc2        | 2.64 | 1.17  | 9.55  | 0.00 | 0.000 | 7.36  |
| Tapbpl        | 2.67 | 4.00  | 18.42 | 0.00 | 0.000 | 15.38 |
| Plek2         | 2.67 | 2.69  | 13.30 | 0.00 | 0.000 | 11.31 |
| Aqp3          | 2.68 | −1.83 | 6.15  | 0.00 | 0.000 | 2.69  |
| Igf2bp1       | 2.69 | 2.60  | 14.88 | 0.00 | 0.000 | 12.64 |
| Nedd9         | 2.70 | 0.68  | 8.86  | 0.00 | 0.000 | 6.49  |
| Car6          | 2.71 | 6.44  | 24.47 | 0.00 | 0.000 | 19.03 |
| Lcn2          | 2.73 | 1.61  | 8.18  | 0.00 | 0.000 | 5.62  |
| Atp2a3        | 2.73 | 2.88  | 15.54 | 0.00 | 0.000 | 13.15 |
| Zfp335os      | 2.76 | 0.12  | 6.52  | 0.00 | 0.000 | 3.26  |
| Ccdc88c       | 2.78 | 1.96  | 12.17 | 0.00 | 0.000 | 10.21 |
| Gata4         | 2.79 | 1.50  | 6.79  | 0.00 | 0.000 | 3.58  |

|               |      |       |       |      |       |       |
|---------------|------|-------|-------|------|-------|-------|
| Elf3          | 2.80 | 2.37  | 15.06 | 0.00 | 0.000 | 12.79 |
| Fam83h        | 2.85 | 1.61  | 11.87 | 0.00 | 0.000 | 9.91  |
| Tmem116       | 2.88 | 0.94  | 8.94  | 0.00 | 0.000 | 6.61  |
| Dusp8         | 2.89 | 3.69  | 19.17 | 0.00 | 0.000 | 15.80 |
| Otog          | 2.90 | 1.37  | 7.54  | 0.00 | 0.000 | 4.74  |
| Gm10762       | 2.93 | −1.03 | 6.62  | 0.00 | 0.000 | 3.41  |
| Fmnl1         | 2.94 | −1.58 | 6.80  | 0.00 | 0.000 | 3.66  |
| Sorl1         | 3.00 | 1.16  | 10.29 | 0.00 | 0.000 | 8.18  |
| Tmem238       | 3.03 | 4.54  | 14.86 | 0.00 | 0.000 | 12.64 |
| Hspb7         | 3.05 | −1.66 | 6.12  | 0.00 | 0.000 | 2.65  |
| Vmn2r3        | 3.05 | −1.78 | 4.23  | 0.00 | 0.002 | −0.46 |
| Rab17         | 3.05 | 0.28  | 7.21  | 0.00 | 0.000 | 4.24  |
| Cnksr1        | 3.08 | 3.04  | 21.79 | 0.00 | 0.000 | 17.32 |
| Esrp2         | 3.09 | −1.45 | 7.28  | 0.00 | 0.000 | 4.37  |
| Dennd2d       | 3.12 | 0.79  | 8.50  | 0.00 | 0.000 | 6.02  |
| Ccdc116       | 3.14 | 0.49  | 11.77 | 0.00 | 0.000 | 9.59  |
| Padi1         | 3.15 | −1.91 | 8.89  | 0.00 | 0.000 | 6.42  |
| Tfr3          | 3.15 | 5.55  | 24.14 | 0.00 | 0.000 | 18.86 |
| Ostn          | 3.16 | −1.31 | 3.73  | 0.00 | 0.005 | −1.32 |
| 5830416I19Rik | 3.18 | −1.22 | 8.00  | 0.00 | 0.000 | 5.32  |
| AU018091      | 3.19 | −1.14 | 7.34  | 0.00 | 0.000 | 4.39  |
| Rph3al        | 3.19 | 0.21  | 11.58 | 0.00 | 0.000 | 9.35  |
| Mamdc2        | 3.19 | 2.68  | 14.05 | 0.00 | 0.000 | 11.81 |
| Itgal         | 3.20 | 1.86  | 13.51 | 0.00 | 0.000 | 11.47 |
| Bmp7          | 3.22 | 3.42  | 19.63 | 0.00 | 0.000 | 16.09 |
| Trpv3         | 3.26 | −1.12 | 7.19  | 0.00 | 0.000 | 4.24  |
| Gm17184       | 3.26 | −1.55 | 6.82  | 0.00 | 0.000 | 3.68  |
| Ccdc92        | 3.29 | 2.70  | 16.59 | 0.00 | 0.000 | 14.00 |
| Rbm3          | 3.34 | 3.13  | 15.38 | 0.00 | 0.000 | 13.05 |
| Gm26692       | 3.35 | −1.52 | 5.40  | 0.00 | 0.000 | 1.50  |
| Serpinb9c     | 3.39 | 0.11  | 9.43  | 0.00 | 0.000 | 7.11  |
| Emb           | 3.40 | 2.10  | 15.90 | 0.00 | 0.000 | 13.34 |
| Tmem102       | 3.44 | −1.03 | 7.71  | 0.00 | 0.000 | 4.87  |
| Aox3          | 3.44 | −1.66 | 5.01  | 0.00 | 0.001 | 0.86  |
| Sult4a1       | 3.44 | 0.36  | 9.36  | 0.00 | 0.000 | 7.01  |
| Plet1         | 3.47 | 1.49  | 13.69 | 0.00 | 0.000 | 11.43 |
| Stx3          | 3.48 | 3.48  | 21.06 | 0.00 | 0.000 | 16.90 |
| Gm3336        | 3.60 | −1.91 | 6.27  | 0.00 | 0.000 | 2.88  |
| Tns4          | 3.65 | −1.34 | 8.88  | 0.00 | 0.000 | 6.41  |
| Spry3         | 3.69 | −1.14 | 5.59  | 0.00 | 0.000 | 1.80  |
| Sptbn2        | 3.77 | 2.91  | 20.19 | 0.00 | 0.000 | 16.33 |
| Tmem40        | 3.83 | −1.85 | 6.55  | 0.00 | 0.000 | 3.30  |
| Prkg2         | 3.88 | 0.03  | 8.37  | 0.00 | 0.000 | 5.77  |
| Ak7           | 3.93 | −1.26 | 10.46 | 0.00 | 0.000 | 8.08  |
| Utp20         | 3.97 | 7.83  | 31.68 | 0.00 | 0.000 | 22.37 |
| Zdhhc23       | 3.97 | 0.49  | 10.42 | 0.00 | 0.000 | 8.12  |
| Ovol1         | 4.00 | 2.44  | 16.18 | 0.00 | 0.000 | 13.52 |
| Pkp3          | 4.01 | 3.86  | 24.75 | 0.00 | 0.000 | 18.96 |
| Mylk          | 4.06 | 2.16  | 16.56 | 0.00 | 0.000 | 13.77 |
| Creb3l3       | 4.07 | −1.62 | 9.79  | 0.00 | 0.000 | 7.29  |
| Clec2f        | 4.10 | −1.11 | 9.42  | 0.00 | 0.000 | 7.02  |

|          |      |       |       |      |       |       |
|----------|------|-------|-------|------|-------|-------|
| Crabp2   | 4.20 | −1.88 | 8.02  | 0.00 | 0.000 | 5.24  |
| Fcgbp    | 4.36 | 0.17  | 13.23 | 0.00 | 0.000 | 10.57 |
| Frmd4b   | 4.36 | −1.11 | 8.85  | 0.00 | 0.000 | 6.07  |
| Dpf1     | 4.39 | 1.01  | 6.78  | 0.00 | 0.000 | 3.65  |
| Sbk3     | 4.44 | 1.58  | 16.52 | 0.00 | 0.000 | 13.62 |
| Taf7l    | 4.46 | 0.13  | 9.14  | 0.00 | 0.000 | 6.39  |
| Acsbg1   | 4.49 | −1.89 | 5.78  | 0.00 | 0.000 | 2.05  |
| Gm4316   | 4.62 | 1.63  | 13.37 | 0.00 | 0.000 | 11.15 |
| Lncenc1  | 4.66 | 1.90  | 12.35 | 0.00 | 0.000 | 10.36 |
| Kcnma1   | 4.69 | −1.71 | 4.95  | 0.00 | 0.001 | 0.74  |
| Lamb3    | 4.70 | 1.51  | 19.19 | 0.00 | 0.000 | 14.91 |
| Spdye4b  | 4.85 | −1.03 | 10.41 | 0.00 | 0.000 | 7.63  |
| Hgfac    | 5.00 | −1.40 | 6.33  | 0.00 | 0.000 | 2.87  |
| Ano9     | 5.01 | −1.01 | 5.63  | 0.00 | 0.000 | 1.83  |
| Plekha7  | 5.03 | −1.92 | 10.05 | 0.00 | 0.000 | 7.37  |
| Prss22   | 5.04 | −1.22 | 6.26  | 0.00 | 0.000 | 2.75  |
| Stra6    | 5.12 | 0.38  | 9.58  | 0.00 | 0.000 | 7.06  |
| Arhgap27 | 5.28 | −1.75 | 10.27 | 0.00 | 0.000 | 7.55  |
| Pou5f1   | 5.42 | −1.28 | 7.40  | 0.00 | 0.000 | 4.28  |
| Scd3     | 5.44 | −1.04 | 13.17 | 0.00 | 0.000 | 10.11 |
| Fam167a  | 5.44 | −1.38 | 11.93 | 0.00 | 0.000 | 9.10  |
| Gjb4     | 5.54 | −1.98 | 7.36  | 0.00 | 0.000 | 4.24  |
| Cyp4f39  | 5.68 | −1.99 | 8.95  | 0.00 | 0.000 | 6.08  |
| Slc18a1  | 5.81 | −1.53 | 8.24  | 0.00 | 0.000 | 5.27  |
| Tmem144  | 5.95 | −1.78 | 7.05  | 0.00 | 0.000 | 3.84  |
| Tmem266  | 6.18 | −1.56 | 7.95  | 0.00 | 0.000 | 5.02  |
| Gm2a     | 6.38 | −1.76 | 8.24  | 0.00 | 0.000 | 5.27  |
| Gm5640   | 6.39 | −1.65 | 8.34  | 0.00 | 0.000 | 5.39  |
| Eya2     | 6.69 | −1.24 | 12.41 | 0.00 | 0.000 | 9.26  |
| Mapk8ip2 | 6.70 | −1.47 | 10.36 | 0.00 | 0.000 | 7.42  |
| Gm5936   | 6.87 | −1.07 | 11.72 | 0.00 | 0.000 | 8.38  |
| Ptgs1    | 7.04 | −1.14 | 14.82 | 0.00 | 0.000 | 10.39 |
| Blnk     | 7.19 | −1.67 | 9.07  | 0.00 | 0.000 | 6.22  |
| Gpa33    | 7.58 | −1.79 | 13.92 | 0.00 | 0.000 | 9.87  |
| Il24     | 7.70 | −1.35 | 15.47 | 0.00 | 0.000 | 10.53 |
| Sncg     | 7.72 | −1.86 | 13.62 | 0.00 | 0.000 | 9.69  |
| Lpo      | 7.87 | −1.87 | 16.43 | 0.00 | 0.000 | 10.97 |
| Fgfbp1   | 7.92 | −1.36 | 17.68 | 0.00 | 0.000 | 11.46 |
| Krt14    | 7.94 | −1.35 | 17.85 | 0.00 | 0.000 | 11.52 |
| Bicd1    | 7.97 | −1.33 | 15.14 | 0.00 | 0.000 | 10.43 |
| Vrtn     | 8.09 | −1.30 | 16.37 | 0.00 | 0.000 | 10.98 |
| Nxf7     | 8.35 | −1.51 | 15.09 | 0.00 | 0.000 | 10.51 |
| Krt18    | 8.38 | −1.30 | 15.93 | 0.00 | 0.000 | 10.97 |
| Dmkn     | 8.40 | −1.83 | 15.68 | 0.00 | 0.000 | 10.73 |
| Lypd5    | 8.52 | −1.84 | 16.56 | 0.00 | 0.000 | 11.12 |
| Inhbe    | 8.93 | −1.85 | 11.39 | 0.00 | 0.000 | 8.32  |
| Lypd3    | 9.87 | −1.05 | 18.34 | 0.00 | 0.000 | 11.96 |
| Slc6a13  | 9.97 | −1.19 | 20.74 | 0.00 | 0.000 | 12.69 |

**Table S4.** Alternatively spliced genes in TNBC cells following miR-200c restoration.

| #  | Gene Symbol | p-Value   | RefSeq       | Gene Gene                                                    |
|----|-------------|-----------|--------------|--------------------------------------------------------------|
| 1  | KIF1B       | 2.71E-153 | NM_015074    | Kinesin family member 1B                                     |
| 2  | MACF1       | 5.39E-146 | NM_012090    | Microtubule-actin crosslinking factor 1                      |
| 3  | DST         | 1.52E-141 | NM_001723    | Dystonin                                                     |
| 4  | UBB         | 1.61E-109 | NM_018955    | Ubiquitin B                                                  |
| 5  | DDR1        | 9.28E-103 | NM_001202521 | Discoidin domain receptor tyrosine kinase 1                  |
| 6  | ANK2        | 1.29E-98  | NM_001127493 | Ankyrin 2                                                    |
| 7  | NPNT        | 1.32E-93  | NM_001033047 | Nephronectin                                                 |
| 8  | GPR126      | 1.10E-87  | NM_001032394 | G-protein coupled receptor 126                               |
| 9  | LRBA        | 2.88E-87  | NM_001199282 | LPS responsive beige-like anchor protein                     |
| 10 | LPHN2       | 2.15E-73  | NM_012302    | Latrophilin 2                                                |
| 11 | MARK3       | 3.27E-71  | NM_001128918 | Microtubule affinity regulating kinase 3                     |
| 12 | ESYT2       | 1.93E-68  | NM_020728    | Extended synaptotagmin 2                                     |
| 13 | ITGB4       | 1.76E-61  | NM_000213    | Integrin subunit beta 4                                      |
| 14 | PLCB4       | 1.79E-61  | NM_000933    | Phospholipase c beta 4                                       |
| 15 | TPM1        | 3.80E-61  | NM_000366    | Tropomyosin 1                                                |
| 16 | LAMA5       | 3.31E-56  | NM_005560    | Laminin subunit alpha 5                                      |
| 17 | FHOD3       | 4.67E-54  | NM_025135    | Formin homology 2 domain containing 3                        |
| 18 | OSBPL6      | 4.99E-52  | NM_001201480 | Oxysterol binding protein like 6                             |
| 19 | LAMC2       | 8.60E-52  | NM_005562    | Laminin subunit alpha 5                                      |
| 20 | NIN         | 1.49E-49  | NM_016350    | Ninein                                                       |
| 21 | KIF21A      | 2.67E-49  | NM_001173463 | Kinesin family member 21A                                    |
| 22 | ERBB3       | 3.16E-47  | NM_001005915 | Erb-B2 receptor tyrosine kinase 3                            |
| 23 | TPM3        | 6.35E-47  | NM_001043351 | Tropomyosin 3                                                |
| 24 | VEPH1       | 6.80E-46  | NM_001167911 | Ventricular zone expressed PH domain containing 1            |
| 25 | ZEB1        | 2.87E-45  | NM_001128128 | Zinc finger E-box binding homeobox 1                         |
| 26 | ZNF385B     | 3.15E-45  | NM_001113397 | Zinc finger protein 385B                                     |
| 27 | VAV3        | 1.60E-43  | NM_001079874 | Vav guanine nucleotide exchange factor 3                     |
| 28 | EPB41L4B    | 1.67E-43  | NM_018424    | Erythrocyte membrane protein band 4.1 like 4B                |
| 29 | CCSER2      | 7.63E-43  | NM_018999    | Coiled-coil serine rich protein 2                            |
| 30 | NRXN3       | 8.47E-43  | NM_001105250 | Neurexin 3                                                   |
| 31 | RAI14       | 1.04E-42  | NM_001145520 | Retinoic acid induced 14                                     |
| 32 | PCNXL2      | 1.26E-42  | NM_014801    | Pecanex homolog 2                                            |
| 33 | FAT1        | 4.50E-42  | NM_005245    | FAT atypical cadherin 1                                      |
| 34 | OSBPL8      | 6.69E-42  | NM_001003712 | Oxysterol binding protein like 8                             |
| 35 | SEPT11      | 1.79E-41  | NM_018243    | Septin 11                                                    |
| 36 | SYTL2       | 3.81E-41  | NM_001162951 | Synaptotagmin like 2                                         |
| 37 | NALCN       | 2.55E-40  | NM_052867    | Sodium leak channel, non-selective                           |
| 38 | SLC12A8     | 2.86E-40  | NM_001195483 | Solute carrier family 12 member 8                            |
| 39 | ATP5C1      | 5.24E-38  | NM_001001973 | ATP synthase F1 subunit gamma                                |
| 40 | AP1S2       | 6.78E-38  | NM_003916    | Adaptor related protein complex 1 sigma 2 subunit            |
| 41 | PLEKHA1     | 3.38E-37  | NM_001001974 | Pleckstrin homology domain containing A1                     |
| 42 | MST1R       | 4.96E-37  | NM_001244937 | Macrophage stimulating 1 receptor                            |
| 43 | TPD52L1     | 9.24E-37  | NM_001003395 | Tumor protein D52 like 1                                     |
| 44 | CDH3        | 1.50E-36  | NM_001793    | Cadherin 3                                                   |
| 45 | MAP7        | 4.14E-36  | NM_001198608 | Microtubule associated protein 7                             |
| 46 | STXBP5      | 7.54E-36  | NM_001127715 | Syntaxin binding protein 5                                   |
| 47 | CASK        | 1.67E-35  | NM_001126054 | Calcium/calmodulin dependent serine protein kinase           |
| 48 | PLEKHA5     | 4.72E-35  | NM_001143821 | Pleckstrin homology domain containing A5                     |
| 49 | TIAF1       | 2.99E-34  | NM_004740    | TGFB1-induced anti-apoptotic factor 1                        |
| 50 | PRKAR1B     | 4.36E-33  | NM_001164758 | Protein kinase CAMP-dependent type I regulatory subunit beta |
| 51 | SPAG9       | 6.84E-33  | NM_001130527 | Sperm associated antigen 9                                   |
| 52 | CHODL       | 7.93E-33  | NM_001204174 | Chondrolectin                                                |
| 53 | CLSTN1      | 9.01E-33  | NM_001009566 | Calsynterin 1                                                |

|     |           |          |              |                                                   |
|-----|-----------|----------|--------------|---------------------------------------------------|
| 54  | ANK3      | 9.24E-33 | NM_001149    | Ankyrin 3                                         |
| 55  | STX2      | 9.41E-33 | NM_001980    | Syntaxin 2                                        |
| 56  | OGDH      | 9.76E-33 | NM_001003941 | Oxoglutarate dehydrogenase                        |
| 57  | JAG2      | 1.85E-32 | NM_002226    | Jagged 2                                          |
| 58  | DEPDC1    | 3.01E-31 | NM_001114120 | DEP domain containing 1                           |
| 59  | MFSD6     | 6.83E-31 | NM_017694    | Major facilitator superfamily domain containing 6 |
| 60  | GOLGA4    | 1.10E-30 | NM_001172713 | Golgin A4                                         |
| 61  | SLC29A2   | 4.12E-29 | NM_001532    | Solute carrier family 29 member 2                 |
| 62  | CKMT1A    | 9.23E-29 | NM_001015001 | Creatine kinase, mitochondrial 1A                 |
| 63  | ERBB2IP   | 1.04E-28 | NM_001006600 | ErbB2 interacting protein                         |
| 64  | ABCC3     | 1.30E-28 | NM_001144070 | ATP binding cassette subfamily c member 3         |
| 65  | H2AFY     | 7.10E-28 | NM_001040158 | H2A histone family member Y                       |
| 66  | FAM13C    | 7.99E-28 | NM_001001971 | Family with sequence similarity 13 member C       |
| 67  | SMPDL3B   | 3.46E-27 | NM_001009568 | Sphingomyelin phosphodiesterase acid like 3B      |
| 68  | SLAIN1    | 1.19E-26 | NM_001040153 | SLAIN motif family member 1                       |
| 69  | UPK3B     | 1.30E-26 | NM_030570    | Uroplakin 3B                                      |
| 70  | PHKA2     | 7.33E-26 | NM_000292    | Phosphorylase kinase regulatory subunit alpha 2   |
| 71  | SLC44A3   | 1.14E-25 | NM_001114106 | Solute carrier family 44 member 3                 |
| 72  | CAST      | 5.10E-25 | NM_001042440 | Calpastatin                                       |
| 73  | TPD52     | 6.44E-25 | NM_001025252 | Tumor protein D52                                 |
| 74  | LRRFIP1   | 1.27E-24 | NM_001137550 | LRR binding FLII interacting protein 1            |
| 75  | DLG1      | 1.50E-24 | NM_001098424 | Discs large MAGUK scaffold protein 1              |
| 76  | MPRIIP    | 1.84E-24 | NM_015134    | Myosin phosphatase Rho interacting protein        |
| 77  | CNTN4     | 2.01E-24 | NM_001206955 | Contactin 4                                       |
| 78  | AP1S3     | 2.94E-24 | NM_001039569 | Adaptor related protein complex 1 sigma 3 subunit |
| 79  | SEPT6     | 4.25E-24 | NM_015129    | Septin 6                                          |
| 80  | EPCAM     | 2.74E-23 | NM_002354    | Epithelial cell adhesion molecule                 |
| 81  | MARC1     | 3.46E-23 | NM_022746    | Mitochondrial amidoxime reducing component 1      |
| 82  | TMEM25    | 7.30E-23 | NM_001144034 | Transmembrane protein 25                          |
| 83  | DCAF6     | 1.27E-22 | NM_001017977 | DDB1 and CUL4 associated factor 6                 |
| 84  | GRB7      | 1.50E-22 | NM_001030002 | Growth factor receptor bound protein 7            |
| 85  | WDFY3     | 1.66E-22 | NM_014991    | WD repeat and FYVE domain containing 3            |
| 86  | NHSL1     | 1.70E-22 | NM_001144060 | NHS like 1                                        |
| 87  | EPB41     | 2.17E-22 | NM_001166005 | Erythrocyte membrane protein band 4.1             |
| 88  | GSAP      | 2.96E-22 | NM_017439    | Gamma-secretase activating protein                |
| 89  | CENPT     | 3.34E-22 | NM_025082    | Centromere protein T                              |
| 90  | DTNB      | 4.35E-22 | NM_001256303 | Dystrobrevin beta                                 |
| 91  | MBP       | 4.96E-22 | NM_001025081 | Myelin basic protein                              |
| 92  | VGLL4     | 7.12E-22 | NM_001128219 | Vestigial like family member 4                    |
| 93  | STX3      | 9.09E-22 | NM_001178040 | Syntaxin 3                                        |
| 94  | SPINT2    | 1.94E-21 | NM_001166103 | Serine peptidase inhibitor, Kunitz type 2         |
| 95  | STK10     | 2.32E-21 | NM_005990    | Serine/threonine kinase 10                        |
| 96  | NUMB      | 3.13E-21 | NM_001005743 | NUMB, endocytic adaptor protein                   |
| 97  | RAB11FIP4 | 3.21E-21 | NM_032932    | RAB11 family interacting protein 4                |
| 98  | WDR96     | 6.97E-21 | NM_025145    | WD repeat-containing protein 96                   |
| 99  | SVIL      | 1.62E-20 | NM_003174    | Supervillin                                       |
| 100 | FOXP1     | 3.80E-20 | NM_001012505 | Forkhead box P1                                   |

Includes only the top 100 alternatively spliced genes identified by microarray and visually verified by two independent observers; TNBC, triple-negative breast cancer.

**Table S5.** Alternatively spliced genes in TNBC cells following miR-200c restoration.

| # | Gene Symbol | p-value   | RefSeq    | Gene gene                               |
|---|-------------|-----------|-----------|-----------------------------------------|
| 1 | KIF1B       | 2.71E-153 | NM_015074 | Kinesin family member 1B                |
| 2 | MACF1       | 5.39E-146 | NM_012090 | Microtubule-actin crosslinking factor 1 |
| 3 | DST         | 1.52E-141 | NM_001723 | Dystonin                                |
| 4 | UBB         | 1.61E-109 | NM_018955 | Ubiquitin B                             |

|    |         |           |              |                                                    |
|----|---------|-----------|--------------|----------------------------------------------------|
| 5  | DDR1    | 9.28E-103 | NM_001202521 | Discoidin domain receptor tyrosine kinase 1        |
| 6  | ANK2    | 1.29E-98  | NM_001127493 | Ankyrin 2                                          |
| 9  | LRBA    | 2.88E-87  | NM_001199282 | LPS responsive beige-like anchor protein           |
| 11 | MARK3   | 3.27E-71  | NM_001128918 | Microtubule affinity regulating kinase 3           |
| 12 | ESYT2   | 1.93E-68  | NM_020728    | Extended synaptotagmin 2                           |
| 13 | ITGB4   | 1.76E-61  | NM_000213    | Integrin subunit beta 4                            |
| 15 | TPM1    | 3.80E-61  | NM_000366    | Tropomyosin 1                                      |
| 16 | LAMA5   | 3.31E-56  | NM_005560    | Laminin subunit alpha 5                            |
| 17 | FHOD3   | 4.67E-54  | NM_025135    | Formin homology 2 domain containing 3              |
| 19 | LAMC2   | 8.60E-52  | NM_005562    | Laminin subunit alpha 5                            |
| 20 | NIN     | 1.49E-49  | NM_016350    | Ninein                                             |
| 23 | TPM3    | 6.35E-47  | NM_001043351 | Tropomyosin 3                                      |
| 25 | ZEB1    | 2.87E-45  | NM_001128128 | Zinc finger E-box binding homeobox 1               |
| 29 | CCSER2  | 7.63E-43  | NM_018999    | Coiled-coil serine rich protein 2                  |
| 31 | RAI14   | 1.04E-42  | NM_001145520 | Retinoic acid induced 14                           |
| 33 | FAT1    | 4.50E-42  | NM_005245    | FAT atypical cadherin 1                            |
| 34 | OSBPL8  | 6.69E-42  | NM_001003712 | Oxysterol binding protein like 8                   |
| 39 | ATP5C1  | 5.24E-38  | NM_001001973 | ATP synthase F1 subunit gamma                      |
| 40 | AP1S2   | 6.78E-38  | NM_003916    | Adaptor related protein complex 1 sigma 2 subunit  |
| 41 | PLEKHA1 | 3.38E-37  | NM_001001974 | Pleckstrin homology domain containing A1           |
| 42 | MST1R   | 4.96E-37  | NM_001244937 | Macrophage stimulating 1 receptor                  |
| 46 | STXBP5  | 7.54E-36  | NM_001127715 | Syntaxin binding protein 5                         |
| 47 | CASK    | 1.67E-35  | NM_001126054 | Calcium/calmodulin dependent serine protein kinase |
| 48 | PLEKHA5 | 4.72E-35  | NM_001143821 | Pleckstrin homology domain containing A5           |
| 51 | SPAG9   | 6.84E-33  | NM_001130527 | Sperm associated antigen 9                         |
| 53 | CLSTN1  | 9.01E-33  | NM_001009566 | Calsyntenin 1                                      |
| 54 | ANK3    | 9.24E-33  | NM_001149    | Ankyrin 3                                          |
| 55 | STX2    | 9.41E-33  | NM_001980    | Syntaxin 2                                         |
| 56 | OGDH    | 9.76E-33  | NM_001003941 | Oxoglutarate dehydrogenase                         |
| 58 | DEPDC1  | 3.01E-31  | NM_001114120 | DEP domain containing 1                            |
| 60 | GOLGA4  | 1.10E-30  | NM_001172713 | Golgin A4                                          |
| 61 | SLC29A2 | 4.12E-29  | NM_001532    | Solute carrier family 29 member 2                  |
| 64 | ABCC3   | 1.30E-28  | NM_001144070 | ATP binding cassette subfamily c member 3          |
| 67 | SMPDL3B | 3.46E-27  | NM_001009568 | Sphingomyelin phosphodiesterase acid like 3B       |
| 70 | PHKA2   | 7.33E-26  | NM_000292    | Phosphorylase kinase regulatory subunit alpha 2    |
| 71 | SLC44A3 | 1.14E-25  | NM_001114106 | Solute carrier family 44 member 3                  |
| 72 | CAST    | 5.10E-25  | NM_001042440 | Calpastatin                                        |
| 73 | TPD52   | 6.44E-25  | NM_001025252 | Tumor protein D52                                  |
| 74 | LRRFIP1 | 1.27E-24  | NM_001137550 | LRR binding FLII interacting protein 1             |
| 75 | DLG1    | 1.50E-24  | NM_001098424 | Discs large MAGUK scaffold protein 1               |
| 76 | MPRIIP  | 1.84E-24  | NM_015134    | Myosin phosphatase Rho interacting protein         |
| 80 | EPCAM   | 2.74E-23  | NM_002354    | Epithelial cell adhesion molecule                  |
| 82 | TMEM25  | 7.30E-23  | NM_001144034 | Transmembrane protein 25                           |
| 83 | DCAF6   | 1.27E-22  | NM_001017977 | DDB1 and CUL4 associated factor 6                  |
| 85 | WDFY3   | 1.66E-22  | NM_014991    | WD repeat and FYVE domain containing 3             |
| 86 | NHSL1   | 1.70E-22  | NM_001144060 | NHS like 1                                         |
| 87 | EPB41   | 2.17E-22  | NM_001166005 | Erythrocyte membrane protein band 4.1              |
| 89 | CENPT   | 3.34E-22  | NM_025082    | Centromere protein T                               |
| 90 | DTNB    | 4.35E-22  | NM_001256303 | Dystrobrevin beta                                  |
| 92 | VGLL4   | 7.12E-22  | NM_001128219 | Vestigial like family member 4                     |

---

|     |         |          |              |                                           |
|-----|---------|----------|--------------|-------------------------------------------|
| 93  | STX3    | 9.09E-22 | NM_001178040 | Syntaxin 3                                |
| 94  | SPINT2  | 1.94E-21 | NM_001166103 | Serine peptidase inhibitor, Kunitz type 2 |
| 95  | STK10   | 2.32E-21 | NM_005990    | Serine/threonine kinase 10                |
| 96  | NUMB    | 3.13E-21 | NM_001005743 | NUMB, endocytic adaptor protein           |
| 99  | SVIL    | 1.62E-20 | NM_003174    | Supervillin                               |
| 100 | FOXP1   | 3.80E-20 | NM_001012505 | Forkhead box P1                           |
| 63  | ERBB2IP | 1.04E-28 | NM_001006600 | ErbB2 interacting protein                 |
| 65  | H2AFY   | 7.10E-28 | NM_001040158 | H2A histone family member Y               |
| 35  | SEPT11  | 1.79E-41 | NM_018243    | Septin 11                                 |
| 79  | SEPT6   | 4.25E-24 | NM_015129    | Septin 6                                  |

---

Includes only the top 100 alternatively spliced genes identified by microarray and visually verified by two independent observers; TNBC, triple-negative breast cancer.
